# Supplementary material for: Stereoselective Synthesis of trans-Decalin-Based Spirocarbocycles via Photocyclization of 1,2-Diketones
Source: PubMed Central journal article supplement — ACS Omega. 2021 Jul 13;6(29):18848–59. doi: 10.1021/acsomega.1c02054 (PMC8320103; doi:10.1021/acsomega.1c02054), 2021-07-13
Supplement: ao1c02054_si_001.pdf [file ao1c02054_si_001.pdf]

# Supporting Information

## Stereoselective Synthesis of trans-Decalin-based Spirocarbocycles via Photocyclization of 1,2-Diketones

Sijia Chen,<sup>†</sup> Zhongchao Zhang,<sup>†</sup> Chongguo Jiang,<sup>†</sup> Chunbo Zhao,<sup>†</sup> Haojie Luo,<sup>†</sup> Jun Huang,<sup>\*,†</sup> Zhen Yang<sup>\*,†,‡,¶</sup>

<sup>†</sup> State Key Laboratory of Chemical Oncogenomics and Key Laboratory of Chemical Genomics, Peking University Shenzhen Graduate School, Shenzhen 518055, China

<sup>‡</sup> Key Laboratory of Bioorganic Chemistry and Molecular Engineering of Ministry of Education and Beijing National Laboratory for Molecular Science (BNLMS), and Peking-Tsinghua Center for Life Sciences, Peking University, Beijing 100871, China

<sup>¶</sup> Shenzhen Bay Laboratory, Shenzhen 518055, China

### **Table of Contents**

|                                      |     |
|--------------------------------------|-----|
| Part I: Experimental Procedures..... | S2  |
| Part II: Computational Details.....  | S13 |
| Part III: References.....            | S19 |
| Part IV: NMR Spectra.....            | S20 |
| Part V: X-ray Crystal Images.....    | S70 |

## Part I: Experimental Procedures

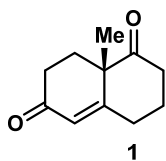

**Conditions:** Chiralcel OD-H, hexane/*i*-PrOH 40/1, 1 mL/min.

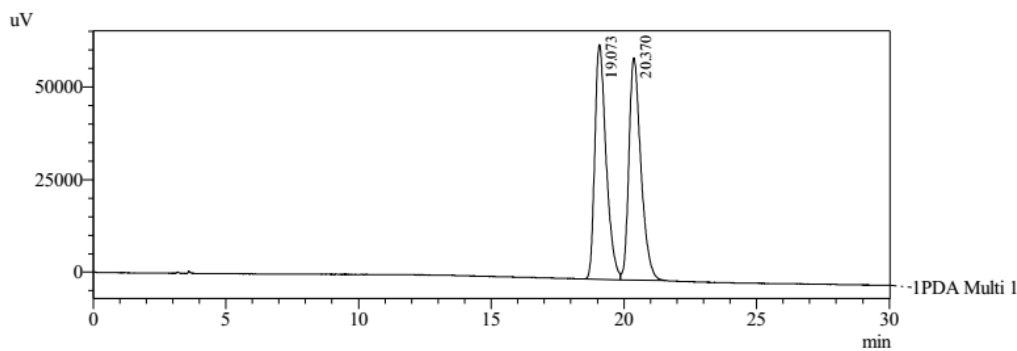

1 PDA Multi 1 / 254nm 4nm

PeakTable

| Peak# | Ret. Time | Area    | Height | Area %  | Height % |
|-------|-----------|---------|--------|---------|----------|
| 1     | 19.073    | 1876643 | 63385  | 49.877  | 51.384   |
| 2     | 20.370    | 1885915 | 59971  | 50.123  | 48.616   |
| Total |           | 3762558 | 123356 | 100.000 | 100.000  |

**Figure S1.** HPLC spectrum of ( $\pm$ ) **1**

**Conditions:** Chiralcel OD-H, hexane/*i*-PrOH 40/1, 1 mL/min. (*ee* = 89%).

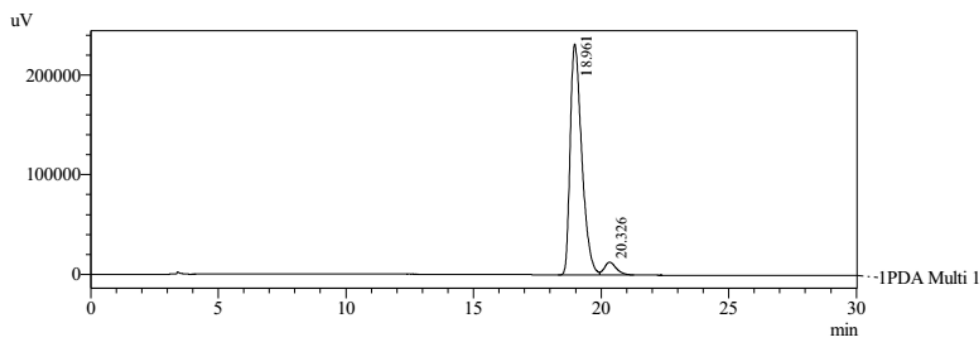

1 PDA Multi 1 / 254nm 4nm

PeakTable

| Peak# | Ret. Time | Area    | Height | Area %  | Height % |
|-------|-----------|---------|--------|---------|----------|
| 1     | 18.961    | 7311420 | 231915 | 94.608  | 94.760   |
| 2     | 20.326    | 416674  | 12824  | 5.392   | 5.240    |
| Total |           | 7728093 | 244739 | 100.000 | 100.000  |

**Figure S2.** HPLC spectrum of (+) **1**

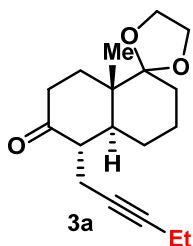

(4*aS*,5*S*,8*aS*)-8*a*-methyl-5-(pent-2-yn-1-yl)hexahydro-2*H*-spiro[naphthalene-1,2'-[1,3]dioxolan]-6(5*H*)-one (**3a**): yellowish oil (4.05 g, 50%),  $R_f = 0.43$  (silica gel, hexane/EtOAc = 5:1, KMnO<sub>4</sub>);  $[\alpha]_D^{25} = 8.00$  ( $c = 1.0$ , in CHCl<sub>3</sub>); IR (thin film)  $\nu_{max}$  2950, 1772, 1427, 1236, 1186, 1070, 969, 919 cm<sup>-1</sup>; <sup>1</sup>H NMR (500 MHz, CDCl<sub>3</sub>)  $\delta$  3.98 – 3.83 (m, 4H), 2.55 – 2.44 (m, 1H), 2.44 – 2.31 (m, 3H), 2.29 – 2.25 (m, 1H), 2.16 – 2.02 (m, 3H), 1.99 – 1.90 (m, 1H), 1.78 – 1.67 (m, 4H), 1.59 – 1.48 (m, 2H), 1.27 (dd,  $J = 9.1, 3.7$  Hz, 1H), 1.23 (s, 3H), 1.08 (t,  $J = 7.5$  Hz, 3H); <sup>13</sup>C NMR (125 MHz, CDCl<sub>3</sub>)  $\delta$  210.3, 112.4, 82.4, 77.0, 65.2, 64.9, 49.7, 45.2, 42.2, 37.5, 30.2, 30.0, 25.1, 22.7, 15.9, 14.3, 14.3, 12.5; MS (ESI,  $m/z$ ) calcd for C<sub>18</sub>H<sub>27</sub>O<sub>3</sub><sup>+</sup> [M+H]<sup>+</sup>: 291.1955, found 291.1954.

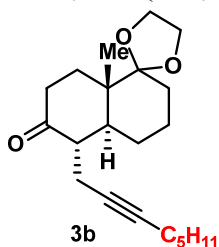

(4*aS*,5*S*,8*aS*)-8*a*-methyl-5-(oct-2-yn-1-yl)hexahydro-2*H*-spiro[naphthalene-1,2'-[1,3]dioxolan]-6(5*H*)-one (**3b**): yellowish oil (3.25 g, 35%),  $R_f = 0.45$  (silica gel, hexane/EtOAc = 5:1, KMnO<sub>4</sub>);  $[\alpha]_D^{24} = 11.47$  ( $c = 1.0$ , in CHCl<sub>3</sub>); IR (thin film)  $\nu_{max}$  2954, 2932, 2874, 1712, 1459, 1186, 1123, 1069 cm<sup>-1</sup>; <sup>1</sup>H NMR (500 MHz, CDCl<sub>3</sub>)  $\delta$  3.96 – 3.82 (m, 4H), 2.52 (dd,  $J = 16.7, 3.4$  Hz, 1H), 2.40 – 2.29 (m, 3H), 2.24 (m, 1H), 2.12 – 2.04 (m, 3H), 1.97 – 1.88 (m, 1H), 1.76 – 1.64 (m, 4H), 1.58 – 1.49 (m, 2H), 1.46 – 1.38 (m, 2H), 1.36 – 1.22 (m, 5H), 1.20 (s, 3H), 0.90 – 0.83 (m, 3H); <sup>13</sup>C NMR (125 MHz, CDCl<sub>3</sub>)  $\delta$  210.4, 112.6, 81.3, 77.7, 65.2, 65.0, 49.7, 45.1, 42.3, 37.6, 31.1, 30.2, 30.1, 28.83, 25.2, 22.8, 22.4, 18.9, 16.0, 14.4, 14.1; MS (ESI,  $m/z$ ) calcd for C<sub>21</sub>H<sub>33</sub>O<sub>3</sub><sup>+</sup> [M+H]<sup>+</sup>: 333.2424, found 333.2427.

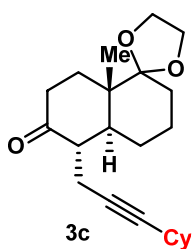

(4*aS*,5*S*,8*aS*)-5-(3-cyclohexylprop-2-yn-1-yl)-8*a*-methylhexahydro-2*H*-spiro[naphthalene-1,2'-[1,3]dioxolan]-6(5*H*)-one (**3c**): yellowish oil (3.36 g, 35%),  $R_f = 0.47$  (silica gel, hexane/EtOAc = 5:1, KMnO<sub>4</sub>);  $[\alpha]_D^{24} = 7.94$  ( $c = 1.0$ , in CHCl<sub>3</sub>); IR (thin film)  $\nu_{max}$  2930, 2855, 1711, 1447, 1187, 1122, 1023, 949 cm<sup>-1</sup>; <sup>1</sup>H NMR (500 MHz, CDCl<sub>3</sub>)  $\delta$  3.98 – 3.81 (m, 4H), 2.52 (m, 1H), 2.42 – 2.25 (m, 4H), 2.26 – 2.17 (m, 1H), 2.12 (td,  $J = 12.2, 3.3$  Hz, 1H), 1.92 (td,  $J = 12.6, 8.2$  Hz, 1H), 1.75 – 1.63 (m, 8H), 1.58 – 1.47 (m, 2H), 1.37 (d,  $J = 9.5$  Hz, 3H), 1.26 (dd,  $J = 10.9, 7.8$  Hz, 4H), 1.20 (s, 3H); <sup>13</sup>C NMR (125 MHz, CDCl<sub>3</sub>)  $\delta$  210.4, 112.6, 85.7, 77.8, 65.3, 65.1, 49.8, 45.1, 42.3, 37.6, 33.0, 33.0, 30.2, 30.2, 29.0, 26.1, 25.3, 24.8, 22.8, 16.1, 14.5; MS (ESI,  $m/z$ ) calcd for C<sub>22</sub>H<sub>33</sub>O<sub>3</sub><sup>+</sup> [M+H]<sup>+</sup>: 345.2424, found 345.2422.

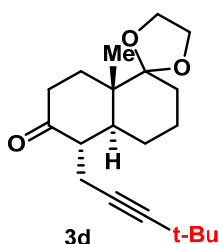

**3d**  
*(4aS,5S,8aS)-5-(4,4-dimethylpent-2-yn-1-yl)-8a-methylhexahydro-2H-spiro[naphthalene-1,2'-[1,3]dioxolan]-6(5H)-one (3d)*: yellowish oil (3.73 g, 42%),  $R_f = 0.52$  (silica gel, hexane/EtOAc = 5:1,  $\text{KMnO}_4$ );  $[\alpha]_D^{24} = -1.89$  ( $c = 1.0$ , in  $\text{CHCl}_3$ ); IR (thin film)  $\nu_{\text{max}}$  2964, 1713, 1446, 1264, 1186, 1080, 949, 876  $\text{cm}^{-1}$ ;  $^1\text{H NMR}$  (500 MHz,  $\text{CDCl}_3$ )  $\delta$  4.01 – 3.83 (m, 4H), 2.49 (dd,  $J = 16.8, 4.0$  Hz, 1H), 2.40 – 2.36 (m, 3H), 2.26 – 2.22 (m, 1H), 2.11 (td,  $J = 12.2, 3.3$  Hz, 1H), 1.94 (td,  $J = 12.6, 7.7$  Hz, 1H), 1.77 – 1.66 (m, 4H), 1.59 – 1.48 (m, 2H), 1.26 (dd,  $J = 13.2, 3.8$  Hz, 1H), 1.22 (s, 3H), 1.16 (s, 9H);  $^{13}\text{C NMR}$  (125 MHz,  $\text{CDCl}_3$ )  $\delta$  210.6, 112.6, 90.2, 76.4, 65.3, 65.1, 50.0, 45.4, 42.3, 37.6, 31.4, 31.2, 30.2, 27.5, 25.4, 22.9, 16.2, 14.6; MS (ESI,  $m/z$ ) calcd for  $\text{C}_{20}\text{H}_{31}\text{O}_3^+$   $[\text{M}+\text{H}]^+$ : 319.2268, found 319.2269.

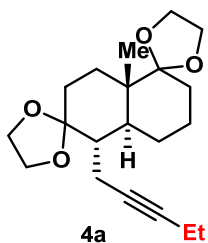

**4a**  
*(4a'S,5'S,8a'S)-8a'-methyl-5'-(pent-2-yn-1-yl)hexahydro-2'H,5'H-dispiro[[1,3]dioxolane-2,1'-naphthalene-6',2''-[1,3]dioxolane] (4a)*: colorless oil (3.25 g, 62%),  $R_f = 0.45$  (silica gel, hexane/EtOAc = 5:1,  $\text{KMnO}_4$ );  $[\alpha]_D^{24} = 2.96$  ( $c = 1.0$ , in  $\text{CHCl}_3$ ); IR (thin film)  $\nu_{\text{max}}$  2876, 1445, 1379, 1291, 1189, 1128, 1075, 954  $\text{cm}^{-1}$ ;  $^1\text{H NMR}$  (500 MHz,  $\text{CDCl}_3$ )  $\delta$  4.01 – 3.78 (m, 8H), 2.35 – 2.29 (m, 1H), 2.15 – 2.10 (m, 2H), 2.09 – 2.00 (m, 1H), 1.89 (td,  $J = 12.3, 3.3$  Hz, 1H), 1.83 (dd,  $J = 13.0, 2.3$  Hz, 1H), 1.76 – 1.64 (m, 5H), 1.57 – 1.48 (m, 3H), 1.37 – 1.30 (m, 1H), 1.22 – 1.16 (m, 1H), 1.08 (t,  $J = 7.5$  Hz, 3H), 1.03 (s, 3H);  $^{13}\text{C NMR}$  (125 MHz,  $\text{CDCl}_3$ )  $\delta$  112.8, 110.7, 81.4, 79.8, 65.3, 65.1, 64.9, 64.8, 44.4, 44.2, 42.5, 30.6, 30.3, 27.5, 24.5, 23.1, 16.3, 14.5, 14.4, 12.7; MS (ESI,  $m/z$ ) calcd for  $\text{C}_{20}\text{H}_{31}\text{O}_4^+$   $[\text{M}+\text{H}]^+$ : 335.2217, found 335.2222.

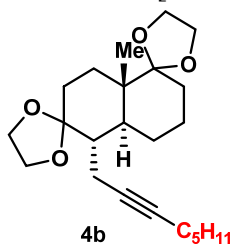

**4b**  
*(4a'S,5'S,8a'S)-8a'-methyl-5'-(oct-2-yn-1-yl)hexahydro-2'H,5'H-dispiro[[1,3]dioxolane-2,1'-naphthalene-6',2''-[1,3]dioxolane] (4b)*: colorless oil (3.76 g, 60%),  $R_f = 0.47$  (silica gel, hexane/EtOAc = 5:1,  $\text{KMnO}_4$ );  $[\alpha]_D^{24} = 2.21$  ( $c = 1.0$ , in  $\text{CHCl}_3$ ); IR (thin film)  $\nu_{\text{max}}$  2954, 2874, 1436, 1343, 1264, 1189, 1043, 955  $\text{cm}^{-1}$ ;  $^1\text{H NMR}$  (500 MHz,  $\text{CDCl}_3$ )  $\delta$  4.01 – 3.78 (m, 8H), 2.33 (dd,  $J = 17.1, 3.0$  Hz, 1H), 2.15 – 2.01 (m, 3H), 1.91 (td,  $J = 12.3, 3.3$  Hz, 1H), 1.87 – 1.80 (m, 1H), 1.80 – 1.64 (m, 5H), 1.58 – 1.42 (m, 5H), 1.39 – 1.25 (m, 5H), 1.18 (dd,  $J = 13.0, 3.8$  Hz, 1H), 1.04 (s, 3H), 0.89 (t,  $J = 7.1$  Hz, 3H);  $^{13}\text{C NMR}$  (125 MHz,  $\text{CDCl}_3$ )  $\delta$  112.8, 110.7, 80.3, 80.1, 65.3, 65.0, 64.8, 64.8,

44.4, 44.1, 42.5, 31.2, 30.6, 30.3, 29.0, 27.4, 24.6, 23.1, 22.4, 18.9, 16.3, 14.3, 14.2; MS (ESI,  $m/z$ ) calcd for  $C_{23}H_{36}NaO_4^+$   $[M+Na]^+$ : 399.2506, found 399.2514.

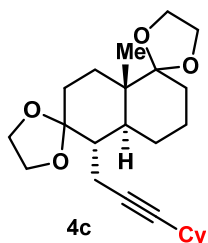

(4*a*'*S*,5'*S*,8*a*'*S*)-5'-(3-cyclohexylprop-2-yn-1-yl)-8*a*'-methylhexahydro-2'*H*,5'*H*-dispiro[[1,3]dioxolane-2,1'-naphthalene-6',2''-[1,3]dioxolane] (**4c**): colorless oil (4.01 g, 62%),  $R_f$  = 0.49 (silica gel, hexane/EtOAc = 5:1,  $KMnO_4$ );  $[\alpha]_D^{24}$  = 2.67 ( $c$  = 1.0, in  $CHCl_3$ ); IR (thin film)  $\nu_{max}$  2929, 2860, 1447, 1189, 1113, 1043, 995, 949  $cm^{-1}$ ;  $^1H$  NMR (500 MHz,  $CDCl_3$ )  $\delta$  4.01 – 3.77 (m, 8H), 2.37 – 2.24 (m, 2H), 2.11 – 2.01 (m, 1H), 1.95 – 1.86 (m, 2H), 1.75 – 1.65 (m, 9H), 1.57 – 1.42 (m, 4H), 1.41 – 1.23 (m, 6H), 1.21 – 1.11 (m, 1H), 1.03 (s, 3H);  $^{13}C$  NMR (125 MHz,  $CDCl_3$ )  $\delta$  112.8, 110.7, 84.5, 80.3, 65.3, 65.1, 64.9, 64.8, 44.5, 44.1, 42.5, 33.2, 30.7, 30.3, 29.3, 27.5, 26.2, 25.0, 24.6, 23.2, 16.3, 14.3; MS (ESI,  $m/z$ ) calcd for  $C_{24}H_{37}O_4^+$   $[M+H]^+$ : 389.2686, found 389.2685.

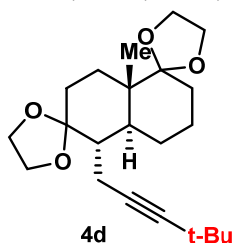

(4*a*'*S*,5'*S*,8*a*'*S*)-5'-(4,4-dimethylpent-2-yn-1-yl)-8*a*'-methylhexahydro-2'*H*,5'*H*-dispiro[[1,3]dioxolane-2,1'-naphthalene-6',2''-[1,3]dioxolane] (**4d**): colorless oil (4.10 g, 68%),  $R_f$  = 0.55 (silica gel, hexane/EtOAc = 5:1,  $KMnO_4$ );  $[\alpha]_D^{24}$  = 3.25 ( $c$  = 1.0, in  $CHCl_3$ ); IR (thin film)  $\nu_{max}$  2957, 2876, 1461, 1360, 1265, 1128, 1040, 949  $cm^{-1}$ ;  $^1H$  NMR (500 MHz,  $CDCl_3$ )  $\delta$  3.99 – 3.77 (m, 8H), 2.31 (dd,  $J$  = 17.2, 3.2 Hz, 1H), 2.02 (dd,  $J$  = 17.2, 6.5 Hz, 1H), 1.95 – 1.82 (m, 2H), 1.77 – 1.62 (m, 5H), 1.57 – 1.46 (m, 3H), 1.33 (m, 1H), 1.21 – 1.10 (m, 10H), 1.03 (s, 3H);  $^{13}C$  NMR (125 MHz,  $CDCl_3$ )  $\delta$  112.8, 110.7, 88.8, 79.0, 65.3, 65.1, 64.9, 64.8, 44.7, 44.3, 42.5, 31.4, 30.7, 30.3, 27.5, 27.5, 24.7, 23.2, 16.3, 14.3; MS (ESI,  $m/z$ ) calcd for  $C_{22}H_{35}O_4^+$   $[M+H]^+$ : 363.2530, found 363.2533.

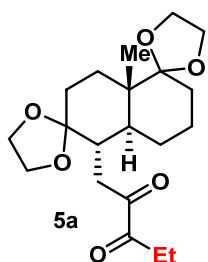

1-((4*a*'*S*,5'*S*,8*a*'*S*)-8*a*'-methylhexahydro-2'*H*,5'*H*-dispiro[[1,3]dioxolane-2,1'-naphthalene-6',2''-[1,3]dioxolan]-5'-yl)pentane-2,3-dione (**5a**): yellowish oil (1.44 g, 63%),  $R_f$  = 0.39 (silica gel, hexane/EtOAc = 5:1,  $KMnO_4$  & UV);  $[\alpha]_D^{24}$  = -31.69 ( $c$  = 1.0, in  $CHCl_3$ ); IR (thin film)  $\nu_{max}$  2939, 2882, 1706, 1457, 1381, 1265, 1117, 948  $cm^{-1}$ ;  $^1H$  NMR (500 MHz,  $CDCl_3$ )  $\delta$  3.96 – 3.77 (m, 7H), 3.59 – 3.55 (m, 1H), 2.91 – 2.83 (m, 1H), 2.73 (dd,  $J$  = 14.0, 4.4 Hz, 1H), 2.58 – 2.47 (m, 1H), 2.46 – 2.41 (m, 1H), 2.26 (dd,  $J$  = 14.0, 10.1 Hz, 1H), 1.81 – 1.62 (m, 5H), 1.54 – 1.38 (m, 4H), 1.37 – 1.29

(m, 1H), 1.23 – 1.16 (m, 2H), 1.09 – 0.99 (m, 6H);  $^{13}\text{C}$  NMR (125 MHz,  $\text{CDCl}_3$ )  $\delta$  200.9, 199.1, 112.7, 110.2, 65.3, 65.1, 64.4, 63.2, 43.4, 42.8, 42.7, 35.3, 30.0, 29.7, 29.2, 27.2, 24.4, 22.8, 14.3, 7.1; MS (ESI,  $m/z$ ) calcd for  $\text{C}_{20}\text{H}_{30}\text{NaO}_6^+$   $[\text{M}+\text{Na}]^+$ : 389.1935, found 389.1936.

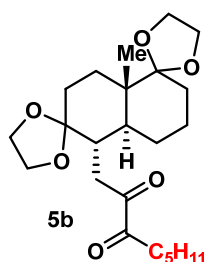

*1-((4a'S,5'S,8a'S)-8a'-methylhexahydro-2'H,5'H-dispiro[[1,3]dioxolane-2,1'-naphthalene-6',2''-[1,3]dioxolan]-5'-yl)octane-2,3-dione (5b)*: yellowish oil (1.58 g, 62%),  $R_f = 0.35$  (silica gel, hexane/EtOAc = 5:1,  $\text{KMnO}_4$  & UV);  $[\alpha]_D^{24} = -25.89$  ( $c = 1.0$ , in  $\text{CHCl}_3$ ); IR (thin film)  $\nu_{\text{max}}$  2955, 2934, 2874, 1699, 1451, 1116, 1081, 948  $\text{cm}^{-1}$ ;  $^1\text{H}$  NMR (500 MHz,  $\text{CDCl}_3$ )  $\delta$  3.95 – 3.74 (m, 7H), 3.57 (dd,  $J = 13.5, 7.0$  Hz, 1H), 2.83 – 2.76 (m, 1H), 2.70 (dd,  $J = 14.1, 4.4$  Hz, 1H), 2.56 – 2.37 (m, 2H), 2.24 (dd,  $J = 14.1, 10.0$  Hz, 1H), 1.79 – 1.59 (m, 5H), 1.59 – 1.51 (m, 2H), 1.51 – 1.36 (m, 4H), 1.34 – 1.22 (m, 5H), 1.16 (dd,  $J = 12.9, 4.3$  Hz, 1H), 1.02 (s, 3H), 0.86 (t,  $J = 7.0$  Hz, 3H);  $^{13}\text{C}$  NMR (125 MHz,  $\text{CDCl}_3$ )  $\delta$  200.5, 199.1, 112.6, 110.2, 65.2, 65.0, 64.3, 63.2, 43.4, 42.7, 42.6, 35.7, 35.3, 31.4, 30.0, 29.7, 27.2, 24.4, 22.8, 22.7, 22.5, 14.2, 14.0; MS (ESI,  $m/z$ ) Calcd for  $\text{C}_{23}\text{H}_{36}\text{NaO}_6^+$   $[\text{M}+\text{Na}]^+$ : 431.2404, found 431.2403.

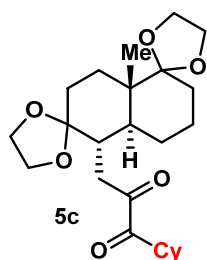

*1-cyclohexyl-3-((4a'S,5'S,8a'S)-8a'-methylhexahydro-2'H,5'H-dispiro[[1,3]dioxolane-2,1'-naphthalene-6',2''-[1,3]dioxolan]-5'-yl)propane-1,2-dione (5c)*: yellowish oil (1.52 g, 58%),  $R_f = 0.45$  (silica gel, hexane/EtOAc = 5:1,  $\text{KMnO}_4$  & UV);  $[\alpha]_D^{24} = -15.81$  ( $c = 1.0$ , in  $\text{CHCl}_3$ ); IR (thin film)  $\nu_{\text{max}}$  2932, 2862, 1708, 1446, 1189, 1117, 1044, 948  $\text{cm}^{-1}$ ;  $^1\text{H}$  NMR (500 MHz,  $\text{CDCl}_3$ )  $\delta$  3.97 – 3.78 (m, 7H), 3.66 – 3.62 (m, 1H), 3.07 – 3.03 (m, 1H), 2.66 (dd,  $J = 14.7, 4.5$  Hz, 1H), 2.49 – 2.41 (m, 1H), 2.37 (dd,  $J = 14.7, 8.8$  Hz, 1H), 1.86 – 1.59 (m, 10H), 1.54 – 1.41 (m, 3H), 1.38 – 1.10 (m, 8H), 1.05 (s, 3H);  $^{13}\text{C}$  NMR (125 MHz,  $\text{CDCl}_3$ )  $\delta$  202.6, 199.0, 112.7, 110.3, 65.3, 65.1, 64.4, 63.6, 43.5, 43.4, 42.7, 42.2, 35.2, 30.0, 29.8, 29.0, 28.0, 27.3, 26.0, 25.8, 25.7, 24.6, 22.9, 14.3; MS (ESI,  $m/z$ ) calcd for  $\text{C}_{24}\text{H}_{37}\text{O}_6^+$   $[\text{M}+\text{H}]^+$ : 421.2585, found 421.2586.

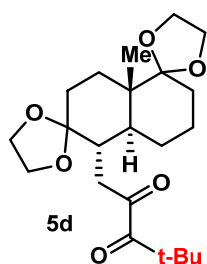

*4,4-dimethyl-1-((4a'S,5'S,8a'S)-8a'-methylhexahydro-2'H,5'H-dispiro[[1,3]dioxolane-2,1'-*

*naphthalene-6',2''-[1,3]dioxolan]-5'-yl)pentane-2,3-dione (5d)*: yellowish oil (1.55 g, 63%),  $R_f = 0.44$  (silica gel, hexane/EtOAc = 5:1, KMnO<sub>4</sub> & UV);  $[\alpha]_D^{24} = -10.5$  (c = 1.0, in CHCl<sub>3</sub>); IR (thin film)  $\nu_{max}$  2956, 1776, 1699, 1460, 1264, 1116, 1044, 948 cm<sup>-1</sup>; <sup>1</sup>H NMR (500 MHz, CDCl<sub>3</sub>)  $\delta$  3.99 – 3.73 (m, 8H), 2.57 (dd,  $J = 5.9, 1.9$  Hz, 2H), 2.47 – 2.43 (m, 1H), 1.79 – 1.66 (m, 3H), 1.64 (d,  $J = 5.9$  Hz, 2H), 1.55 – 1.43 (m, 3H), 1.39 – 1.32 (m, 1H), 1.27 (s, 1H), 1.25 (d,  $J = 17.5$  Hz, 9H), 1.17 – 1.11 (m, 1H), 1.07 (s, 3H); <sup>13</sup>C NMR (125 MHz, CDCl<sub>3</sub>)  $\delta$  206.4, 200.6, 112.7, 110.3, 65.3, 65.1, 64.5, 64.1, 43.7, 42.7, 42.4, 40.5, 36.6, 30.1, 29.7, 27.4, 26.5, 24.7, 22.9, 14.3; MS (ESI,  $m/z$ ) calcd for C<sub>22</sub>H<sub>34</sub>NaO<sub>6</sub><sup>+</sup> [M+Na]<sup>+</sup>: 417.2248, found 417.2243.

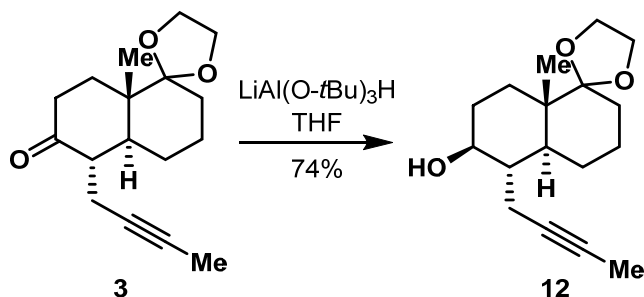

To a solution of **3** (2.00 g, 7.24 mmol) in THF (20 mL) was added lithium tri-tert-butoxyaluminum hydride (3.68 g, 14.47 mmol) at 0 °C in a portion-wise manner under Ar, and the reaction mixture was then warmed up to room temperature, and stirred at room temperature for 4 h. The reaction mixture was carefully quenched by addition of a saturated aqueous solution of potassium sodium tartrate (20 mL) at 0 °C, and the resulting mixture was stirred vigorously for another 4 hours. The mixture was extracted with ethyl acetate (3×30 mL), and the combined extracts were washed with brine (15 mL), and dried over Na<sub>2</sub>SO<sub>4</sub>. The solvent was removed under vacuum. The residue was purified by a flash column chromatography on silica gel (EtOAc: Hexane = 1:9) to give **12** (1.49 g, 74%) as a colorless oil.

(4*aS*,5*S*,6*S*,8*aS*)-5-(but-2-yn-1-yl)-8*a*-methyloctahydro-2*H*-spiro[naphthalene-1,2'-[1,3]dioxolan]-6-ol (**12**): colorless oil (1.49 g, 74%),  $R_f = 0.34$  (silica gel, hexane/EtOAc = 5:1, KMnO<sub>4</sub>);  $[\alpha]_D^{25} = -23.42$  (c = 1.0, in CHCl<sub>3</sub>); IR (thin film)  $\nu_{max}$  2943, 2873, 1437, 1371, 1289, 1187, 1085, 916 cm<sup>-1</sup>; <sup>1</sup>H NMR (500 MHz, CDCl<sub>3</sub>)  $\delta$  4.00 – 3.78 (m, 4H), 3.51 (td,  $J = 10.4, 5.1$  Hz, 1H), 2.66 – 2.52 (m, 1H), 2.21 – 2.16 (m, 1H), 1.89 – 1.82 (m, 1H), 1.78 (t,  $J = 2.6$  Hz, 3H), 1.74 – 1.39 (m, 10H), 1.35 (s, 1H), 1.12 – 1.02 (m, 1H), 1.00 (s, 3H); <sup>13</sup>C NMR (125 MHz, CDCl<sub>3</sub>)  $\delta$  113.1, 76.3, 72.7, 65.3, 65.0, 42.9, 42.4, 42.0, 30.4, 30.2, 28.2, 23.6, 23.0, 17.9, 15.0, 3.8; MS (ESI,  $m/z$ ) calcd for C<sub>17</sub>H<sub>26</sub>NaO<sub>3</sub><sup>+</sup> [M+Na]<sup>+</sup>: 301.1774, found 301.1775.

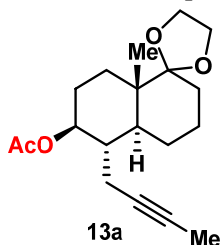

To a solution of **12** (600mg, 2.16 mmol) in DCM (20 mL) was sequentially added Et<sub>3</sub>N (0.9 mL, 6.48 mmol), Ac<sub>2</sub>O (0.4 mL, 4.32 mmol) and DMAP (25 mg, 0.22 mmol) at room temperature, and the resultant reaction mixture was stirred at room temperature for 1 h. The reaction was quenched by saturated aqueous solution of NaHCO<sub>3</sub> (10 mL) at room temperature, and the resulting mixture was extracted with DCM (3×30 mL), and the combined extracts were washed with brine (15 mL), and dried over Na<sub>2</sub>SO<sub>4</sub>. The solvent was removed under vacuum, and the residue was purified by a flash column

chromatography on silica gel (EtOAc: Hexane = 1: 20) to give **13a** (576 mg, 76%) as a colorless oil. (*4aS,5S,6S,8aS*)-5-(*but-2-yn-1-yl*)-8*a*-methyloctahydro-2*H*-spiro[naphthalene-1,2'-[1,3]dioxolan]-6-yl acetate (**13a**): colorless oil (576 mg, 76%),  $R_f = 0.41$  (silica gel, hexane/EtOAc = 10:1,  $\text{KMnO}_4$ );  $[\alpha]_D^{25} = 19.49$  ( $c = 1.0$ , in  $\text{CHCl}_3$ ); IR (thin film)  $\nu_{\text{max}}$  2982, 2875, 1733, 1440, 1378, 1244, 1188, 1080, 962  $\text{cm}^{-1}$ ;  $^1\text{H}$  NMR (500 MHz,  $\text{CDCl}_3$ )  $\delta$  4.66 (td,  $J = 10.8, 5.1$  Hz, 1H), 3.98 – 3.80 (m, 4H), 2.36 – 2.24 (m, 1H), 2.18 – 2.14 (m, 1H), 2.03 (s, 3H), 1.99 (dd,  $J = 9.4, 4.7$  Hz, 1H), 1.76 (t,  $J = 2.6$  Hz, 3H), 1.74 – 1.60 (m, 5H), 1.58 – 1.47 (m, 3H), 1.46 – 1.36 (m, 2H), 1.11 – 1.02 (m, 1H), 1.01 (s, 3H);  $^{13}\text{C}$  NMR (125 MHz,  $\text{CDCl}_3$ )  $\delta$  170.7, 112.8, 77.3, 75.1, 65.4, 65.1, 42.3, 41.9, 39.8, 30.3, 27.9, 26.5, 23.6, 23.0, 21.5, 17.6, 14.9, 3.8; MS (ESI,  $m/z$ ) calcd for  $\text{C}_{19}\text{H}_{28}\text{NaO}_4^+$   $[\text{M}+\text{Na}]^+$ : 343.1880, found 343.1881.

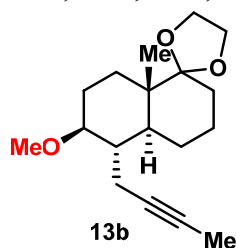

To a solution of **12** (500 mg, 1.80 mmol) in THF (20 mL) was added *n*-BuLi (2.5M, 0.9 mL, 2.16 mmol) at 0 °C under Ar, and the resultant mixture was stirred at 0 °C for 20 min. To this solution was added MeI (0.2 mL, 3.60 mmol) at 0 °C, and the resultant mixture was then slowly warmed up to room temperature, and stirred at room temperature for 8 h. The reaction was quenched with water (5 mL) at room temperature, and the resultant mixture was extracted with ethyl acetate (3×30 mL). The combined organic phases were washed with brine (15 mL), and dried over  $\text{Na}_2\text{SO}_4$ . The solvent was removed under vacuum, and the residue was purified by a flash column chromatography on silica gel (EtOAc: Hexane = 1:20) to give **13b** (455 mg, 87%) as a colorless oil. (*4aS,5S,6S,8aS*)-5-(*but-2-yn-1-yl*)-6-methoxy-8*a*-methyloctahydro-2*H*-spiro[naphthalene-1,2'-[1,3]dioxolane] (**13b**): colorless oil (455 mg, 87%),  $R_f = 0.45$  (silica gel, hexane/EtOAc = 10:1,  $\text{KMnO}_4$ );  $[\alpha]_D^{26} = 35.50$  ( $c = 1.0$ , in  $\text{CHCl}_3$ ); IR (thin film)  $\nu_{\text{max}}$  2925, 2821, 1736, 1439, 1379, 1188, 1080, 949  $\text{cm}^{-1}$ ;  $^1\text{H}$  NMR (500 MHz,  $\text{CDCl}_3$ )  $\delta$  4.01 – 3.81 (m, 4H), 3.37 (s, 3H), 3.04 (td,  $J = 10.8, 5.0$  Hz, 1H), 2.65 – 2.53 (m, 1H), 2.23 – 2.13 (m, 1H), 2.08 – 1.97 (m, 1H), 1.79 (t,  $J = 2.6$  Hz, 3H), 1.72 – 1.40 (m, 8H), 1.39 – 1.26 (m, 2H), 1.09 – 1.00 (m, 1H), 0.99 (s, 3H);  $^{13}\text{C}$  NMR (125 MHz,  $\text{CDCl}_3$ )  $\delta$  113.1, 80.7, 76.6, 76.3, 65.3, 65.0, 56.8, 42.4, 42.0, 41.4, 30.4, 28.0, 25.7, 23.7, 23.1, 17.2, 14.9, 3.8; MS (ESI,  $m/z$ ) calcd for  $\text{C}_{18}\text{H}_{28}\text{NaO}_3^+$   $[\text{M}+\text{Na}]^+$ : 315.1931, found 315.1927.

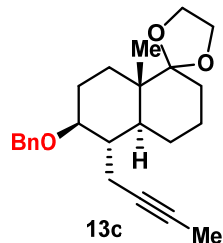

To a solution of **12** (365 mg, 1.31 mmol) in THF (20 mL) was carefully added NaH (60%, 157 mg, 3.93 mmol) and imidazole (9 mg, 0.13 mmol) at 0 °C under Ar, and the resultant mixture was stirred at 0 °C for 30 min. To this solution was sequentially added BnBr (0.2 mL, 1.97 mmol) and TBAI (48 mg, 0.13 mmol) at 0 °C, and the resultant reaction was then warmed up to room temperature, and stirred for 12 h. The reaction mixture was quenched by addition of a saturated aqueous solution of  $\text{NH}_4\text{Cl}$  (10 mL) at 0 °C, and the mixture was extracted with ethyl acetate (3×20 mL). The combined organic phases



were washed with brine (15 mL), and dried over Na<sub>2</sub>SO<sub>4</sub>. The solvent was removed under vacuum, and the residue was purified by a flash column chromatography on silica gel (EtOAc: Hexane = 1:20) to give **13c** (383 mg, 79%) as a colorless oil. (*4aS,5S,6S,8aS*)-6-(benzyloxy)-5-(*but-2-yn-1-yl*)-8a-methyloctahydro-2*H*-spiro[naphthalene-1,2'-[1,3]dioxolane] (**13c**): colorless oil (383 mg, 79%), *R<sub>f</sub>* = 0.42 (silica gel, hexane/EtOAc = 15:1, KMnO<sub>4</sub>); [ $\alpha$ ]<sub>D</sub><sup>26</sup> = 52.08 (c = 1.0, in CHCl<sub>3</sub>); IR (thin film)  $\nu_{max}$  2930, 2870, 1733, 1453, 1287, 1188, 1079, 949 cm<sup>-1</sup>; <sup>1</sup>H NMR (500 MHz, CDCl<sub>3</sub>)  $\delta$  7.38 – 7.26 (m, 5H), 4.65 (d, *J* = 11.3 Hz, 1H), 4.49 (d, *J* = 11.3 Hz, 1H), 3.98 – 3.76 (m, 4H), 3.38 – 3.21 (m, 1H), 2.79 – 2.61 (m, 1H), 2.23 – 2.14 (m, 1H), 2.11 – 1.97 (m, 1H), 1.77 (t, *J* = 2.5 Hz, 3H), 1.73 – 1.61 (m, 4H), 1.60 – 1.40 (m, 6H), 1.04 (dd, *J* = 13.3, 3.3 Hz, 1H), 1.00 (s, 3H); <sup>13</sup>C NMR (125 MHz, CDCl<sub>3</sub>)  $\delta$  139.2, 128.4, 128.1, 127.6, 113.1, 79.2, 76.7, 76.2, 71.4, 65.3, 65.0, 42.3, 41.9, 41.4, 30.3, 28.1, 26.5, 23.7, 23.1, 17.3, 15.0, 3.9; MS (ESI, *m/z*) calcd for C<sub>24</sub>H<sub>32</sub>NaO<sub>3</sub><sup>+</sup> [*M*+Na]<sup>+</sup>: 391.2242, found 391.2242.

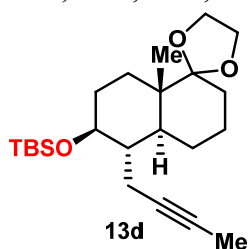

To a solution of **12** (500 mg, 1.80 mmol) in DCM (20 mL) was added TBSCl (543 mg, 3.60 mmol) and imidazole (367 mg, 5.40 mmol) at room temperature under Ar, and the resultant mixture was stirred at the same temperature for 12 h. The reaction mixture was quenched by addition of a saturated aqueous solution of NH<sub>4</sub>Cl (10 mL), and the resultant mixture was extracted with DCM (3×20 mL). The combined extracts were washed with brine (15 mL), and dried over Na<sub>2</sub>SO<sub>4</sub>. The solvent was removed under vacuum, and the residue was purified by a flash column chromatography on silica gel (EtOAc: Hexane = 1:20) to give **13d** (424 mg, 60%) as a colorless oil. (((*4aS,5S,6S,8aS*)-5-(*but-2-yn-1-yl*)-8a-methyloctahydro-2*H*-spiro[naphthalene-1,2'-[1,3]dioxolan]-6-yl)oxy)(*tert*-butyl)dimethylsilane (**13d**): colorless oil (424 mg, 60%), *R<sub>f</sub>* = 0.35 (silica gel, hexane/EtOAc = 10:1, KMnO<sub>4</sub>); [ $\alpha$ ]<sub>D</sub><sup>26</sup> = 32.75 (c = 1.0, in CHCl<sub>3</sub>); IR (thin film)  $\nu_{max}$  2929, 2857, 1460, 1257, 1187, 1089, 1016, 834 cm<sup>-1</sup>; <sup>1</sup>H NMR (500 MHz, CDCl<sub>3</sub>)  $\delta$  4.02 – 3.76 (m, 4H), 3.48 (td, *J* = 10.3, 4.9 Hz, 1H), 2.62 – 2.47 (m, 1H), 2.16 – 2.10 (m, 1H), 1.77 (t, *J* = 2.5 Hz, 4H), 1.71 – 1.41 (m, 9H), 1.37 (d, *J* = 12.3 Hz, 2H), 1.08 – 0.97 (m, 3H), 0.89 (s, 9H), 0.10 – 0.06 (m, 6H); <sup>13</sup>C NMR (125 MHz, CDCl<sub>3</sub>)  $\delta$  113.2, 76.4, 72.8, 65.4, 65.0, 43.0, 42.3, 41.6, 31.1, 30.3, 28.3, 26.1, 23.7, 23.1, 18.2, 17.3, 15.1, 3.8, -4.0, -4.7; MS (ESI, *m/z*) calcd for C<sub>23</sub>H<sub>41</sub>O<sub>3</sub>Si<sup>+</sup> [*M*+H]<sup>+</sup>: 393.2819, found 393.2816.

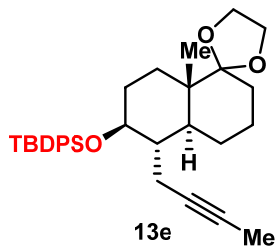

To a solution of **12** (365 mg, 1.31 mmol) in DCM (20 mL) was added TBDPSCl (682 mL, 2.62 mmol) and imidazole (357 mg, 5.24 mmol) at room temperature under Ar, and the resultant mixture was stirred at the same temperature for 12 h. The reaction mixture was quenched by addition of a saturated aqueous solution of NH<sub>4</sub>Cl (10 mL) at room temperature, and the resultant mixture was extracted with DCM (3×20 mL). The combined extracts were washed with brine (15 mL), and dried over Na<sub>2</sub>SO<sub>4</sub>. The

solvent was removed under vacuum, and the residue was purified by a flash column chromatography on silica gel (EtOAc: Hexane = 1:30) to give **13e** (550 mg, 82%) as a colorless oil. (((4*aS*,5*S*,6*S*,8*aS*)-5-(but-2-yn-1-yl)-8*a*-methyloctahydro-2*H*-spiro[naphthalene-1,2'-[1,3]dioxolan]-6-yl)oxy)(*tert*-butyl)diphenylsilane (**13e**): colorless oil (550 mg, 82%),  $R_f = 0.55$  (silica gel, hexane/EtOAc = 15:1,  $\text{KMnO}_4$ );  $[\alpha]_D^{26} = 9.09$  ( $c = 1.0$ , in  $\text{CHCl}_3$ ); IR (thin film)  $\nu_{\text{max}}$  2930, 2857, 1187, 1044, 916, 824, 702, 505  $\text{cm}^{-1}$ ;  $^1\text{H}$  NMR (500 MHz,  $\text{CDCl}_3$ )  $\delta$  7.78 – 7.71 (m, 4H), 7.42 – 7.35 (m, 6H), 3.93 – 3.67 (m, 4H), 3.61 (dd,  $J = 9.9, 4.7$  Hz, 1H), 2.93 – 2.68 (m, 1H), 2.34 – 2.12 (m, 1H), 1.76 (t,  $J = 2.5$  Hz, 3H), 1.70 – 1.39 (m, 9H), 1.32 – 1.20 (m, 2H), 1.17 (dd,  $J = 10.3, 6.7$  Hz, 1H), 1.05 (d,  $J = 11.8$  Hz, 9H), 0.98 (s, 3H);  $^{13}\text{C}$  NMR (125 MHz,  $\text{CDCl}_3$ )  $\delta$  136.3, 136.1, 135.6, 134.1, 129.5, 129.4, 127.5, 127.4, 113.1, 76.8, 76.4, 74.3, 65.2, 64.9, 43.4, 42.2, 41.7, 30.9, 30.3, 28.1, 27.2, 23.7, 23.1, 19.6, 17.6, 15.1, 4.0; MS (ESI,  $m/z$ ) calcd for  $\text{C}_{33}\text{H}_{45}\text{O}_3\text{Si}^+ [\text{M}+\text{H}]^+$ : 517.3132, found 517.3136.

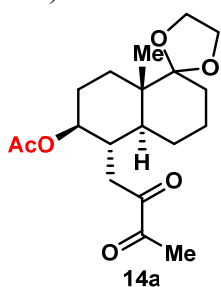

(4*aS*,5*S*,6*S*,8*aS*)-5-(2,3-dioxobutyl)-8*a*-methyloctahydro-2*H*-spiro[naphthalene-1,2'-[1,3]dioxolan]-6-yl acetate (**14a**): yellowish oil (1.39 g, 63%),  $R_f = 0.43$  (silica gel, hexane/EtOAc = 5:1,  $\text{KMnO}_4$  & UV);  $[\alpha]_D^{24} = 3.15$  ( $c = 1.0$ , in  $\text{CHCl}_3$ ); IR (thin film)  $\nu_{\text{max}}$  2949, 2875, 1713, 1376, 1243, 1123, 1027, 952  $\text{cm}^{-1}$ ;  $^1\text{H}$  NMR (500 MHz,  $\text{CDCl}_3$ )  $\delta$  4.45 (td,  $J = 10.8, 4.9$  Hz, 1H), 4.06 – 3.75 (m, 4H), 2.84 (dd,  $J = 17.2, 5.7$  Hz, 1H), 2.42 (dd,  $J = 17.2, 5.4$  Hz, 1H), 2.33 (d,  $J = 4.2$  Hz, 3H), 2.24 – 2.13 (m, 1H), 1.95 (s, 3H), 1.71 – 1.61 (m, 4H), 1.57 – 1.39 (m, 5H), 1.23 – 1.17 (m, 1H), 1.11 (dd,  $J = 12.8, 3.9$  Hz, 1H), 1.05 (s, 3H);  $^{13}\text{C}$  NMR (125 MHz,  $\text{CDCl}_3$ )  $\delta$  198.8, 197.6, 170.5, 112.5, 77.3, 65.3, 65.1, 44.6, 42.7, 37.8, 36.9, 30.0, 27.9, 26.8, 24.6, 24.0, 22.8, 21.3, 14.7; MS (ESI,  $m/z$ ) calcd for  $\text{C}_{19}\text{H}_{28}\text{NaO}_6^+ [\text{M}+\text{Na}]^+$ : 375.1778, found 375.1782.

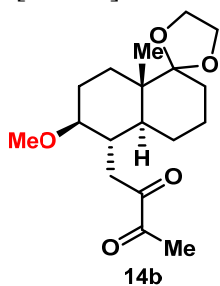

1-((4*aS*,5*S*,6*S*,8*aS*)-6-methoxy-8*a*-methyloctahydro-2*H*-spiro[naphthalene-1,2'-[1,3]dioxolan]-5-yl)butane-2,3-dione (**14b**): yellowish oil (870 mg, 43%),  $R_f = 0.35$  (silica gel, hexane/EtOAc = 5:1,  $\text{KMnO}_4$  & UV);  $[\alpha]_D^{24} = -18.33$  ( $c = 1.0$ , in  $\text{CHCl}_3$ ); IR (thin film)  $\nu_{\text{max}}$  2927, 2871, 2354, 1702, 1188, 1083, 1044, 939;  $^1\text{H}$  NMR (500 MHz,  $\text{CDCl}_3$ )  $\delta$  4.01 – 3.74 (m, 4H), 3.05 (s, 3H), 2.79 (dd,  $J = 12.9, 3.9$  Hz, 1H), 2.66 (td,  $J = 10.8, 4.8$  Hz, 1H), 2.24 (s, 3H), 2.11 (dd,  $J = 12.9, 10.8$  Hz, 1H), 2.06 – 1.91 (m, 2H), 1.72 – 1.64 (m, 2H), 1.54 – 1.41 (m, 5H), 1.41 – 1.33 (m, 1H), 1.32 – 1.14 (m, 2H), 1.00 (s, 3H);  $^{13}\text{C}$  NMR (125 MHz,  $\text{CDCl}_3$ )  $\delta$  198.3, 198.0, 112.8, 84.4, 65.2, 65.1, 54.8, 45.1, 42.8, 42.7, 39.4, 30.0, 27.8, 25.3, 24.1, 23.4, 22.8, 14.9; MS (ESI,  $m/z$ ) calcd for  $\text{C}_{18}\text{H}_{28}\text{NaO}_5^+ [\text{M}+\text{Na}]^+$ : 347.1829, found 347.1828.

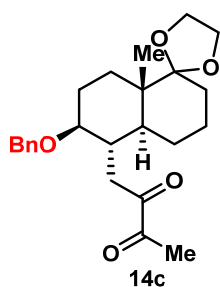

*1-((4a*S*,5*S*,6*S*,8a*S*)-6-(benzyloxy)-8a-methyloctahydro-2*H*-spiro[naphthalene-1,2'-[1,3]dioxolan]-5-yl)butane-2,3-dione (14c)*: yellowish oil (999 mg, 40%),  $R_f = 0.31$  (silica gel, hexane/EtOAc = 10:1,  $\text{KMnO}_4$  & UV);  $[\alpha]_D^{25} = -9.33$  ( $c = 1.0$ , in  $\text{CHCl}_3$ ); IR (thin film)  $\nu_{\text{max}}$  2942, 2870, 1703, 1454, 1354, 1295, 1085, 901  $\text{cm}^{-1}$ ;  $^1\text{H}$  NMR (500 MHz,  $\text{CDCl}_3$ )  $\delta$  7.34 – 7.18 (m, 5H), 4.45 (d,  $J = 11.6$  Hz, 1H), 4.16 (d,  $J = 11.6$  Hz, 1H), 4.01 – 3.75 (m, 4H), 3.03 – 2.88 (m, 1H), 2.81 (dd,  $J = 13.1, 3.1$  Hz, 1H), 2.27 – 2.07 (m, 2H), 2.05 – 1.93 (m, 1H), 1.80 (s, 3H), 1.74 – 1.66 (m, 2H), 1.54 – 1.35 (m, 7H), 1.29 – 1.16 (m, 1H), 1.05 (s, 3H);  $^{13}\text{C}$  NMR (125 MHz,  $\text{CDCl}_3$ )  $\delta$  198.5, 198.1, 138.3, 128.4, 128.2, 127.7, 112.9, 83.2, 70.1, 65.2, 65.1, 45.0, 42.8, 41.9, 39.5, 30.0, 28.0, 26.1, 24.2, 23.3, 22.8, 15.0; MS (ESI,  $m/z$ ) calcd for  $\text{C}_{24}\text{H}_{32}\text{NaO}_5^+$   $[\text{M}+\text{Na}]^+$ : 423.2142, found 423.2144.

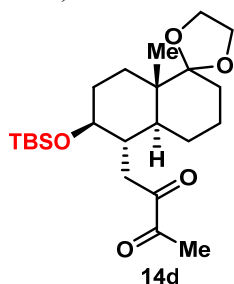

*1-((4a*S*,5*S*,6*S*,8a*S*)-6-((tert-butyl dimethylsilyl)oxy)-8a-methyloctahydro-2*H*-spiro[naphthalene-1,2'-[1,3]dioxolan]-5-yl)butane-2,3-dione (14d)*: yellowish oil (1.85 g, 70%),  $R_f = 0.40$  (silica gel, hexane/EtOAc = 10:1,  $\text{KMnO}_4$  & UV);  $[\alpha]_D^{25} = 4.42$  ( $c = 1.0$ , in  $\text{CHCl}_3$ ); IR (thin film)  $\nu_{\text{max}}$  2927, 2856, 1713, 1256, 1043, 895, 836, 773  $\text{cm}^{-1}$ ;  $^1\text{H}$  NMR (500 MHz,  $\text{CDCl}_3$ )  $\delta$  3.93 – 3.83 (m, 4H), 3.32 (dd,  $J = 12.6, 7.8$  Hz, 1H), 2.85 (dd,  $J = 18.8, 3.3$  Hz, 1H), 2.75 (dd,  $J = 18.9, 7.0$  Hz, 1H), 2.32 (s, 3H), 2.07 – 1.95 (m, 1H), 1.79 (dd,  $J = 6.7, 3.5$  Hz, 1H), 1.71 – 1.33 (m, 11H), 1.05 (s, 4H), 1.00 – 0.94 (m, 1H), 0.83 (s, 9H), 0.04 – -0.01 (m, 6H);  $^{13}\text{C}$  NMR (125 MHz,  $\text{CDCl}_3$ )  $\delta$  199.4, 198.1, 112.9, 75.2, 65.2, 65.1, 44.8, 42.7, 40.4, 36.5, 31.3, 30.1, 28.4, 26.0, 25.2, 24.1, 23.1, 18.2, 15.0, -3.6, -4.5; MS (ESI,  $m/z$ ) calcd for  $\text{C}_{23}\text{H}_{40}\text{NaO}_5^+$   $[\text{M}+\text{Na}]^+$ : 447.2537, found 447.2538.

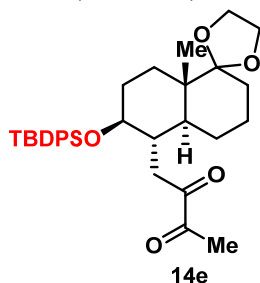

*1-((4a*S*,5*S*,6*S*,8a*S*)-6-((tert-butyl diphenylsilyl)oxy)-8a-methyloctahydro-2*H*-spiro[naphthalene-1,2'-[1,3]dioxolan]-5-yl)butane-2,3-dione (14e)*: yellowish oil (2.84 g, 83%),  $R_f = 0.31$  (silica gel, hexane/EtOAc = 15:1,  $\text{KMnO}_4$  & UV);  $[\alpha]_D^{25} = 3.90$  ( $c = 1.0$ , in  $\text{CHCl}_3$ ); IR (thin film)  $\nu_{\text{max}}$  2950, 1713, 1471, 1350, 1111, 1090, 966, 823  $\text{cm}^{-1}$ ;  $^1\text{H}$  NMR (500 MHz,  $\text{CDCl}_3$ )  $\delta$  7.68 – 7.62 (m, 4H), 7.50 – 7.30 (m, 6H), 3.90 – 3.70 (m, 4H), 3.37 (td,  $J = 10.6, 5.0$  Hz, 1H), 2.97 (dd,  $J = 19.4, 1.9$  Hz, 1H),

2.70 (dd,  $J = 19.4, 7.8$  Hz, 1H), 2.28 (s, 3H), 2.22 – 2.16 (m, 1H), 1.70 – 1.51 (m, 4H), 1.43 (d,  $J = 13.4$  Hz, 1H), 1.36 – 1.20 (m, 4H), 1.06 – 0.99 (m, 4H), 0.97 (s, 9H), 0.89 – 0.82 (m, 1H);  $^{13}\text{C}$  NMR (125 MHz,  $\text{CDCl}_3$ )  $\delta$  199.3, 197.8, 136.1, 135.9, 134.7, 134.2, 129.7, 129.7, 127.8, 127.6, 112.8, 76.1, 65.2, 65.0, 45.2, 42.6, 39.9, 37.2, 31.0, 30.1, 28.2, 27.2, 25.1, 24.1, 23.1, 19.5, 14.9; MS (ESI,  $m/z$ ) calcd for  $\text{C}_{33}\text{H}_{44}\text{NaO}_5\text{Si}^+$   $[\text{M}+\text{Na}]^+$ : 571.2850, found 571.2842.

## Part II: Computational Details:

### Computational Details:

The calculations were performed with the Gaussian 09 program package<sup>1</sup>. The geometry optimizations were performed using B3LYP functional<sup>2</sup> with def-SVP basis set<sup>4</sup> for all atoms. Frequency calculations were also performed at the same level of theory to identify all the stationary points as minima (zero imaginary frequencies) or transition states (one imaginary frequency), and the free energies at 298.15 K. An IRC<sup>3</sup> analysis was performed to confirm that all the stationary points were smoothly connected to each other. Higher level of single point electronic energies for those structures were calculated at B3LYP/def2-TZVP level.<sup>2,4</sup> Dispersion correction using DFT-D3 method<sup>5</sup> and solvation effect using SMD method<sup>6</sup> were applied in all calculations. Vibrational harmonic frequencies and thermal corrections were calculated using the same level as the optimization at 298.15 K; the vibrational harmonic frequency calculations, combined with near-zero gradients, confirmed that the optimized transition state structures are indeed the first order saddle points.

**Table S1.** Calculated imaginary frequencies of all transition states species:

| Species | Frequencies |
|---------|-------------|
| A-TS-T  | -1349.71    |
| B-TS-T  | -1354.58    |

**Table S2.** energy values:

| <b>Species</b> | Zero-point correction (Hartree) | Thermal correction to Energy (Hartree) | Thermal correction to Enthalpy (Hartree) | Thermal correction to Gibbs Free Energy (Hartree) | Sum of electronic and zero-point Energie (Hartree) | Sum of electronic and thermal Energies (Hartree) | Sum of electronic and thermal Enthalpies (Hartree) | Sum of electronic and thermal Free Energies (Hartree) | Solvated Electronic Energy (Hartree) | Solvated Gibbs Free Energy (Hartree) |
|----------------|---------------------------------|----------------------------------------|------------------------------------------|---------------------------------------------------|----------------------------------------------------|--------------------------------------------------|----------------------------------------------------|-------------------------------------------------------|--------------------------------------|--------------------------------------|
| <b>A-T</b>     | 0.453419                        | 0.476673                               | 0.477617                                 | 0.400505                                          | -1190.894576                                       | -1190.871322                                     | -1190.870378                                       | -1190.947490                                          | -1192.6701431                        | -1192.2696381                        |
| <b>A-TS-T</b>  | 0.448119                        | 0.470812                               | 0.471756                                 | 0.396525                                          | -1190.883888                                       | -1190.861195                                     | -1190.860251                                       | -1190.935482                                          | -1192.6563538                        | -1192.2598288                        |
| <b>A-H-T</b>   | 0.453936                        | 0.476948                               | 0.477892                                 | 0.401775                                          | -1190.900937                                       | -1190.877925                                     | -1190.876981                                       | -1190.953098                                          | -1192.6744827                        | -1192.2727077                        |
| <b>B-T</b>     | 0.453580                        | 0.476838                               | 0.477782                                 | 0.400181                                          | -1190.896556                                       | -1190.873298                                     | -1190.872354                                       | -1190.949956                                          | -1192.6715559                        | -1192.2713749                        |
| <b>B-TS-T</b>  | 0.448206                        | 0.470843                               | 0.471787                                 | 0.396602                                          | -1190.884088                                       | -1190.861452                                     | -1190.860508                                       | -1190.935692                                          | -1192.6555022                        | -1192.2589002                        |
| <b>B-H-T</b>   | 0.452793                        | 0.476026                               | 0.476970                                 | 0.400586                                          | -1190.893709                                       | -1190.870476                                     | -1190.869532                                       | -1190.945916                                          | -1192.6679921                        | -1192.2674061                        |

**Table S3.** Data for calculated geometries**A-T**

|   |           |           |           |
|---|-----------|-----------|-----------|
| C | 2.695429  | -0.754778 | 0.120014  |
| C | 1.087830  | -0.771778 | 2.065054  |
| C | 1.563602  | 1.383302  | 0.839429  |
| C | 0.272364  | 2.104800  | 1.215191  |
| C | -0.856026 | 1.803209  | 0.227054  |
| C | -1.085490 | 0.278164  | 0.078523  |
| C | 1.378218  | -0.141865 | 0.687328  |
| C | 0.235850  | -0.407283 | -0.350716 |
| C | 0.095089  | -1.902772 | -0.681161 |
| C | 1.419117  | -2.507019 | -1.164505 |
| C | 2.564546  | -2.249823 | -0.186119 |
| C | -2.277991 | 0.046563  | -0.867417 |
| C | -2.982591 | -1.301952 | -0.741710 |
| O | -3.039363 | -2.108639 | -1.683149 |
| C | -3.644383 | -1.593409 | 0.551230  |
| O | -3.630361 | -0.767654 | 1.482596  |
| O | 3.753268  | -0.515661 | 1.037256  |
| C | 4.341239  | 0.525439  | -0.922288 |
| C | 4.917252  | -0.206102 | 0.285773  |
| O | -0.574941 | 2.343737  | -1.058576 |
| H | 1.957538  | -0.639774 | 2.725324  |
| H | 0.223903  | -0.301740 | 2.554752  |
| H | 0.874612  | -1.847649 | 2.004549  |
| H | 2.348121  | 1.587496  | 1.583634  |
| H | 1.912203  | 1.785833  | -0.122724 |
| H | 0.427761  | 3.195245  | 1.231948  |
| H | -0.079853 | 1.820517  | 2.218144  |
| H | 0.554007  | 0.092932  | -1.280969 |
| H | -0.279272 | -2.453014 | 0.199638  |
| H | -0.653857 | -2.043214 | -1.470703 |
| H | 1.301272  | -3.589252 | -1.339322 |
| H | 3.524001  | -2.596808 | -0.601153 |
| H | 2.401766  | -2.790182 | 0.758703  |
| H | -3.050455 | 0.789784  | -0.615560 |
| H | -1.984339 | 0.180692  | -1.916325 |
| H | 4.941599  | 0.396844  | -1.836717 |
| H | 4.225933  | 1.606317  | -0.718831 |
| H | 5.455932  | -1.124279 | -0.016495 |
| H | 5.585854  | 0.413707  | 0.901300  |
| H | 1.683247  | -2.052724 | -2.134349 |
| O | 3.071799  | -0.089848 | -1.095900 |

|   |           |           |           |
|---|-----------|-----------|-----------|
| C | -1.147971 | 3.642459  | -1.102871 |
| C | -4.338996 | -2.926827 | 0.708867  |
| H | -5.403356 | -2.766962 | 0.946748  |
| H | -4.240378 | -3.498353 | -0.225239 |
| H | -3.885710 | -3.483193 | 1.545666  |
| O | -2.039271 | 2.462237  | 0.679452  |
| C | -2.406413 | 3.472927  | -0.254985 |
| H | -1.379262 | -0.065818 | 1.080903  |
| H | -1.352488 | 3.906383  | -2.150663 |
| H | -3.262469 | 3.137346  | -0.869592 |
| H | -2.694239 | 4.389740  | 0.283383  |
| H | -0.465173 | 4.397227  | -0.669621 |

**A-TS-T**

|   |           |           |           |
|---|-----------|-----------|-----------|
| C | 2.691184  | -0.629915 | 0.044431  |
| C | 1.011154  | -0.935109 | 1.905333  |
| C | 1.381422  | 1.354611  | 0.915649  |
| C | 0.025955  | 1.935514  | 1.314883  |
| C | -1.027106 | 1.698807  | 0.234665  |
| C | -1.104467 | 0.227271  | -0.194764 |
| C | 1.316464  | -0.156924 | 0.609646  |
| C | 0.252394  | -0.396648 | -0.510820 |
| C | 0.197530  | -1.868742 | -0.954230 |
| C | 1.571445  | -2.347893 | -1.438586 |
| C | 2.668466  | -2.096557 | -0.401858 |
| C | -2.242318 | -0.097318 | -1.127065 |
| C | -3.072196 | -1.344417 | -0.739469 |
| O | -3.782112 | -1.911049 | -1.579595 |
| C | -3.028496 | -1.763502 | 0.645045  |
| O | -2.242934 | -1.194432 | 1.522606  |
| O | 3.695198  | -0.411713 | 1.023121  |
| C | 4.275495  | 0.854454  | -0.802121 |
| C | 4.859568  | 0.051728  | 0.356022  |
| O | -0.740467 | 2.451775  | -0.941173 |
| H | 1.836097  | -0.798128 | 2.619673  |
| H | 0.087784  | -0.585627 | 2.384148  |
| H | 0.888908  | -2.013024 | 1.737765  |
| H | 2.124011  | 1.536195  | 1.706745  |
| H | 1.727275  | 1.879805  | 0.013169  |
| H | 0.101253  | 3.020908  | 1.485274  |
| H | -0.349599 | 1.493857  | 2.250091  |
| H | 0.612162  | 0.185545  | -1.383232 |
| H | -0.156996 | -2.497944 | -0.121182 |
| H | -0.531449 | -1.995809 | -1.768021 |

|              |           |           |           |            |           |           |           |
|--------------|-----------|-----------|-----------|------------|-----------|-----------|-----------|
| H            | 1.531133  | -3.418611 | -1.696981 | O          | 0.830669  | 2.668254  | 0.658779  |
| H            | 3.660132  | -2.339514 | -0.814577 | H          | -1.227921 | -1.671011 | -2.014535 |
| H            | 2.520250  | -2.730314 | 0.485351  | H          | 0.407594  | -1.346830 | -1.397292 |
| H            | -2.961549 | 0.734729  | -1.151406 | H          | -0.674697 | -2.385859 | -0.479884 |
| H            | -1.898224 | -0.266351 | -2.158757 | H          | -1.388157 | 0.887923  | -2.230387 |
| H            | 4.916262  | 0.857968  | -1.697934 | H          | -1.432301 | 1.876519  | -0.760597 |
| H            | 4.070959  | 1.899566  | -0.504235 | H          | 0.682144  | 2.323460  | -1.925508 |
| H            | 5.476235  | -0.792349 | -0.006932 | H          | 1.089808  | 0.599223  | -1.970891 |
| H            | 5.456307  | 0.653939  | 1.056961  | H          | -0.957041 | 0.914852  | 1.403008  |
| H            | 1.832871  | -1.804128 | -2.361888 | H          | -0.344454 | -2.070191 | 1.714098  |
| O            | 3.064083  | 0.168460  | -1.088396 | H          | -0.365161 | -0.869427 | 3.002224  |
| C            | -1.449193 | 3.679625  | -0.833068 | H          | -2.538928 | -2.146222 | 2.878526  |
| C            | -3.878532 | -2.890183 | 1.140420  | H          | -4.119138 | -1.571517 | 0.980345  |
| H            | -4.539533 | -2.545113 | 1.954110  | H          | -2.709621 | -2.483613 | 0.405584  |
| H            | -4.484842 | -3.281988 | 0.313007  | H          | 3.009183  | 0.002930  | 1.433079  |
| H            | -3.246359 | -3.695908 | 1.552164  | H          | 1.840264  | -0.960206 | 2.355924  |
| O            | -2.292180 | 2.157635  | 0.699810  | H          | -5.090862 | 1.723810  | 0.071061  |
| C            | -2.716742 | 3.268873  | -0.085663 | H          | -3.807795 | 2.137154  | -1.115639 |
| H            | -1.551313 | -0.364925 | 0.861498  | H          | -5.394191 | -0.488694 | -0.882150 |
| H            | -1.638539 | 4.070096  | -1.843443 | H          | -4.879896 | 0.359773  | -2.379007 |
| H            | -3.517340 | 2.962516  | -0.783496 | H          | -2.752465 | -0.399819 | 2.662394  |
| H            | -3.105627 | 4.061308  | 0.573107  | O          | -3.262299 | 0.814990  | 0.403429  |
| H            | -0.865148 | 4.425838  | -0.262651 | C          | 1.855783  | 3.643841  | 0.531361  |
|              |           |           |           | C          | 3.441162  | -2.946708 | -1.523339 |
|              |           |           |           | H          | 4.524211  | -3.017916 | -1.722836 |
|              |           |           |           | H          | 3.090133  | -3.862884 | -1.034168 |
|              |           |           |           | H          | 2.940966  | -2.851389 | -2.504820 |
|              |           |           |           | O          | 2.658373  | 1.663843  | -0.274188 |
|              |           |           |           | C          | 3.115094  | 2.793183  | 0.476759  |
|              |           |           |           | H          | 3.373161  | 0.206366  | -0.679930 |
|              |           |           |           | H          | 1.819282  | 4.320074  | 1.398101  |
|              |           |           |           | H          | 3.442123  | 2.483606  | 1.485388  |
|              |           |           |           | H          | 3.952752  | 3.260041  | -0.060060 |
|              |           |           |           | H          | 1.737090  | 4.234738  | -0.396602 |
|              |           |           |           |            |           |           |           |
|              |           |           |           | <b>B-T</b> |           |           |           |
|              |           |           |           | C          | 3.051989  | -0.391340 | 0.097405  |
|              |           |           |           | C          | 1.492673  | -0.926246 | 2.008895  |
|              |           |           |           | C          | 1.372597  | 1.326591  | 0.876949  |
|              |           |           |           | C          | -0.066337 | 1.637618  | 1.275592  |
|              |           |           |           | C          | -1.071087 | 1.089687  | 0.257738  |
|              |           |           |           | C          | -0.874286 | -0.416007 | 0.001879  |
|              |           |           |           | C          | 1.612583  | -0.183012 | 0.663022  |
|              |           |           |           | C          | 0.598243  | -0.702908 | -0.409830 |
|              |           |           |           |            |           |           |           |
| <b>A-H-T</b> |           |           |           |            |           |           |           |
| C            | -2.710471 | -0.398081 | -0.131476 |            |           |           |           |
| C            | -0.641907 | -1.482900 | -1.102914 |            |           |           |           |
| C            | -0.929292 | 1.023534  | -1.239277 |            |           |           |           |
| C            | 0.553743  | 1.367577  | -1.392687 |            |           |           |           |
| C            | 1.250097  | 1.482060  | -0.033112 |            |           |           |           |
| C            | 0.969755  | 0.287212  | 0.841291  |            |           |           |           |
| C            | -1.181990 | -0.236080 | -0.379564 |            |           |           |           |
| C            | -0.492339 | -0.014262 | 1.019779  |            |           |           |           |
| C            | -0.815492 | -1.126358 | 2.029048  |            |           |           |           |
| C            | -2.327902 | -1.305493 | 2.197279  |            |           |           |           |
| C            | -3.025838 | -1.529313 | 0.853716  |            |           |           |           |
| C            | 2.078753  | -0.580655 | 1.352327  |            |           |           |           |
| C            | 2.337619  | -1.846261 | 0.502467  |            |           |           |           |
| O            | 1.825086  | -2.931910 | 0.836457  |            |           |           |           |
| C            | 3.150940  | -1.754195 | -0.680022 |            |           |           |           |
| O            | 3.681080  | -0.618886 | -1.135582 |            |           |           |           |
| O            | -3.363592 | -0.606904 | -1.375328 |            |           |           |           |
| C            | -4.235697 | 1.325934  | -0.497640 |            |           |           |           |
| C            | -4.588787 | 0.110299  | -1.347991 |            |           |           |           |



|   |           |           |           |               |           |           |           |
|---|-----------|-----------|-----------|---------------|-----------|-----------|-----------|
| C | 0.868767  | -2.170461 | -0.786500 | H             | -1.262382 | 3.796296  | -0.515197 |
| C | 2.309645  | -2.376261 | -1.269449 |               |           |           |           |
| C | 3.336342  | -1.852043 | -0.265784 | <b>B-TS-T</b> |           |           |           |
| C | -1.855843 | -0.946668 | -1.060661 | C             | 2.920074  | -0.450207 | 0.062782  |
| C | -3.331463 | -0.722083 | -0.758037 | C             | 1.190037  | -1.168808 | 1.756384  |
| O | -4.045585 | 0.016260  | -1.454752 | C             | 1.290329  | 1.237962  | 1.007679  |
| C | -3.884997 | -1.470192 | 0.391393  | C             | -0.149947 | 1.580279  | 1.381401  |
| O | -3.173848 | -2.257712 | 1.045749  | C             | -1.107737 | 1.294404  | 0.230571  |
| O | 3.996974  | 0.088376  | 1.042702  | C             | -0.943296 | -0.122533 | -0.347042 |
| C | 4.289060  | 1.334616  | -0.863124 | C             | 1.458991  | -0.230503 | 0.562336  |
| C | 5.035679  | 0.739349  | 0.326085  | C             | 0.505502  | -0.504102 | -0.649410 |
| O | -0.984057 | 1.776864  | -0.980060 | C             | 0.701294  | -1.914139 | -1.230616 |
| H | 2.273960  | -0.574045 | 2.698453  | C             | 2.158667  | -2.148012 | -1.646650 |
| H | 0.520046  | -0.749284 | 2.487870  | C             | 3.139988  | -1.854292 | -0.511048 |
| H | 1.604693  | -2.013933 | 1.906378  | C             | -2.029569 | -0.466382 | -1.333509 |
| H | 2.074085  | 1.708217  | 1.634009  | C             | -3.356637 | -0.920645 | -0.685316 |
| H | 1.590187  | 1.850332  | -0.065461 | O             | -4.429279 | -0.798196 | -1.290045 |
| H | -0.218946 | 2.725029  | 1.364080  | C             | -3.264508 | -1.546627 | 0.615977  |
| H | -0.320239 | 1.204891  | 2.254696  | O             | -2.137794 | -1.603902 | 1.280969  |
| H | 0.786059  | -0.099645 | -1.314207 | O             | 3.818736  | -0.191788 | 1.129904  |
| H | 0.653932  | -2.826134 | 0.075277  | C             | 4.321711  | 1.314971  | -0.528181 |
| H | 0.188041  | -2.486076 | -1.590434 | C             | 4.942701  | 0.491553  | 0.595895  |
| H | 2.491556  | -3.443224 | -1.479211 | O             | -0.902203 | 2.207143  | -0.847286 |
| H | 4.355577  | -1.906031 | -0.679615 | H             | 1.936440  | -0.987011 | 2.543317  |
| H | 3.325215  | -2.453128 | 0.655876  | H             | 0.196315  | -1.002992 | 2.192498  |
| H | -1.640081 | -0.493357 | -2.036766 | H             | 1.242806  | -2.231274 | 1.485715  |
| H | -1.745145 | -2.038556 | -1.135677 | H             | 1.964092  | 1.442538  | 1.852786  |
| H | 4.908628  | 1.416124  | -1.770100 | H             | 1.595604  | 1.892189  | 0.177674  |
| H | 3.876863  | 2.331473  | -0.619878 | H             | -0.246652 | 2.645874  | 1.641545  |
| H | 5.809077  | 0.019006  | -0.001811 | H             | -0.494519 | 1.005194  | 2.253677  |
| H | 5.502291  | 1.492435  | 0.978093  | H             | 0.816752  | 0.214753  | -1.434359 |
| H | 2.445990  | -1.834389 | -2.220477 | H             | 0.381551  | -2.669288 | -0.492524 |
| O | 3.241495  | 0.399828  | -1.085297 | H             | 0.058975  | -2.054094 | -2.112293 |
| C | -1.821411 | 2.919920  | -0.891142 | H             | 2.289228  | -3.182121 | -2.004988 |
| C | -5.315473 | -1.187039 | 0.785572  | H             | 4.180399  | -1.914885 | -0.867035 |
| H | -5.818600 | -2.116795 | 1.091064  | H             | 3.030340  | -2.587425 | 0.302126  |
| H | -5.322934 | -0.491391 | 1.643151  | H             | -2.271189 | 0.398814  | -1.967981 |
| H | -5.838607 | -0.720271 | -0.061886 | H             | -1.724099 | -1.281921 | -2.005051 |
| O | -2.392286 | 1.335062  | 0.736612  | H             | 5.009675  | 1.493686  | -1.369520 |
| C | -2.926360 | 2.486173  | 0.088997  | H             | 3.950753  | 2.287969  | -0.156274 |
| H | -1.088520 | -0.927454 | 0.951693  | H             | 5.696700  | -0.219437 | 0.208033  |
| H | -2.203919 | 3.152439  | -1.895935 | H             | 5.401011  | 1.099331  | 1.390003  |
| H | -3.851090 | 2.197872  | -0.435062 | H             | 2.397065  | -1.482336 | -2.493057 |
| H | -3.159215 | 3.272003  | 0.827440  | O             | 3.241489  | 0.500087  | -0.963447 |

|              |           |           |           |   |           |           |           |
|--------------|-----------|-----------|-----------|---|-----------|-----------|-----------|
| C            | -1.887675 | 3.228721  | -0.742688 | H | 0.145464  | -1.065823 | 2.069349  |
| C            | -4.468728 | -2.127216 | 1.285468  | H | 1.158791  | -2.289261 | 1.294473  |
| H            | -4.296583 | -3.184608 | 1.550085  | H | 1.922928  | 1.359817  | 1.921961  |
| H            | -4.680916 | -1.584712 | 2.223656  | H | 1.621053  | 1.899824  | 0.260940  |
| H            | -5.333721 | -2.048293 | 0.613475  | H | -0.281942 | 2.582931  | 1.667950  |
| O            | -2.443870 | 1.501969  | 0.680809  | H | -0.533549 | 0.924593  | 2.226857  |
| C            | -3.073144 | 2.488333  | -0.131831 | H | 0.909113  | 0.343536  | -1.457872 |
| H            | -1.326329 | -0.887728 | 0.616777  | H | 0.431389  | -2.605664 | -0.776416 |
| H            | -2.086400 | 3.634150  | -1.745591 | H | 0.195372  | -1.846564 | -2.351934 |
| H            | -3.705725 | 2.009426  | -0.900729 | H | 2.414250  | -3.002537 | -2.216044 |
| H            | -3.706188 | 3.128332  | 0.501663  | H | 4.245525  | -1.850364 | -0.882936 |
| H            | -1.540337 | 4.046824  | -0.084069 | H | 3.024530  | -2.586227 | 0.171697  |
|              |           |           |           | H | -2.225241 | 0.167391  | -2.105113 |
|              |           |           |           | H | -1.724031 | -1.506715 | -1.837340 |
| <b>B-H-T</b> |           |           |           | H | 5.110315  | 1.590555  | -1.120131 |
| C            | 2.950205  | -0.435837 | 0.075718  | H | 3.996356  | 2.302174  | 0.095809  |
| C            | 1.140549  | -1.246983 | 1.640062  | H | 5.717460  | -0.234526 | 0.361255  |
| C            | 1.282234  | 1.202502  | 1.041443  | H | 5.374632  | 1.002279  | 1.617581  |
| C            | -0.170727 | 1.525756  | 1.379735  | H | 2.550768  | -1.270027 | -2.562661 |
| C            | -1.105121 | 1.266304  | 0.200567  | O | 3.323857  | 0.578038  | -0.868121 |
| C            | -0.881509 | -0.083004 | -0.457946 | C | -1.946670 | 3.223858  | -0.690102 |
| C            | 1.469504  | -0.238627 | 0.521918  | C | -4.604268 | -2.011900 | 1.295936  |
| C            | 0.560866  | -0.432419 | -0.742933 | H | -4.602014 | -3.098466 | 1.492824  |
| C            | 0.790514  | -1.790543 | -1.428330 | H | -4.677759 | -1.507492 | 2.276968  |
| C            | 2.266950  | -1.998824 | -1.785077 | H | -5.479925 | -1.748485 | 0.690007  |
| C            | 3.187768  | -1.799824 | -0.580676 | O | -2.447895 | 1.423113  | 0.655370  |
| C            | -2.010466 | -0.579223 | -1.318594 | C | -3.108164 | 2.404889  | -0.139729 |
| C            | -3.359051 | -0.857868 | -0.633120 | H | -1.462563 | -1.486889 | 0.775778  |
| O            | -4.420213 | -0.501920 | -1.172583 | H | -2.150200 | 3.673288  | -1.673335 |
| C            | -3.359162 | -1.602157 | 0.598053  | H | -3.693527 | 1.920216  | -0.940972 |
| O            | -2.217065 | -1.949607 | 1.210853  | H | -3.788207 | 2.986464  | 0.501079  |
| O            | 3.799670  | -0.257210 | 1.198569  | H | -1.644826 | 4.019841  | 0.016671  |
| C            | 4.383644  | 1.356585  | -0.326456 |   |           |           |           |
| C            | 4.950278  | 0.453606  | 0.763956  |   |           |           |           |
| O            | -0.919521 | 2.250023  | -0.831536 |   |           |           |           |
| H            | 1.870927  | -1.151123 | 2.456578  |   |           |           |           |

## Part III: References

1. Frisch, M. J.; Trucks, G. W.; Schlegel, H. B.; Scuseria, G. E.; Robb, M. A.; Cheeseman, J. R.; Scalmani, G.; Barone, V.; Mennucci, B.; Petersson, G. A.; Nakatsuji, H.; Caricato, M.; Li, X.; Hratchian, H. P.; Izmaylov, A. F.; Bloino, J.; Zheng, G.; Sonnenberg, J. L.; Hada, M.; Ehara, M.; Toyota, K.; Fukuda, R.; Hasegawa, J.; Ishida, M.; Nakajima, T.; Honda, Y.; Kitao, O.; Nakai, H.; Vreven, T.; Montgomery, J. A.; Peralta, J. E.; Ogliaro, F.; Bearpark, M.; Heyd, J. J.; Brothers, E.; Kudin, K. N.; Staroverov, V. N.; Kobayashi, R.; Normand, J.; Raghavachari, K.; Rendell, A.; Burant, J. C.; Iyengar, S. S.; Tomasi, J.; Cossi, M.; Rega, N.; Millam, J. M.; Klene, M.; Knox, J. E.; Cross, J. B.; Bakken, V.; Adamo, C.; Jaramillo, J.; Gomperts, R.; Stratmann, R. E.; Yazyev, O.; Austin, A. J.; Cammi, R.; Pomelli, C.; Ochterski, J. W.; Martin, R. L.; Morokuma, K.; Zakrzewski, V. G.; Voth, G. A.; Salvador, P.; Dannenberg, J. J.; Dapprich, S.; Daniels, A. D.; Farkas; Foresman, J. B.; Ortiz, J. V.; Cioslowski, J.; Fox, D. J., Gaussian 09, Revision E.01. Gaussian Inc: Wallingford, CT, 2009.
2. (a) Head-Gordon, M.; Pople, J. A.; Frisch, M. J. MP2 energy evaluation by direct methods. *Chem. Phys. Lett.* **1988**, *153*, 503-506. (b) Becke, A. D. Density-functional thermochemistry. III. The role of exact exchange. *J. Chem. Phys.* **1993**, *98*, 5648-5652. (c) Lee, C.; Yang, W.; Parr, R. G. Development of the Colle-Salvetti correlation-energy formula into a functional of the electron density. *Phys. Rev. B: Condens. Matter Mater. Phys.* **1988**, *37*, 785-789. (d) Vosko, S. H.; Wilk, L.; Nusair, M. Accurate spin-dependent electron liquid correlation energies for local spin density calculations: a critical analysis. *Can. J. Phys.* **1980**, *58*, 1200-1211. (e) Stephens, P. J.; Devlin, F. J.; Chabalowski, C. F.; Frisch, M. J. Ab Initio Calculation of Vibrational Absorption and Circular Dichroism Spectra Using Density Functional Force Fields. *J. Phys. Chem.* **1994**, *98*, 11623-11627.
3. (a) Fukui, K. Formulation of the reaction coordinate. *J. Phys. Chem.* **1970**, *74*, 4161-4163. (b) Fukui, K. The path of chemical reactions-the IRC approach. *Acc. Chem. Res.*, **1981**, *14*, 363-368.
4. Weigend, F.; Ahlrichs, R., Balanced basis sets of split valence, triple zeta valence and quadruple zeta valence quality for H to Rn: Design and assessment of accuracy. *Phys. Chem. Chem. Phys.* **2005**, *7*, 3297-3305.
5. Grimme, S.; Antony, J.; Ehrlich, S.; Krieg, H., A consistent and accurate ab initio parametrization of density functional dispersion correction (DFT-D) for the 94 elements H-Pu. *J. Chem. Phys.* **2010**, *132*, 154104-154104.
6. Marenich, A. V.; Cramer, C. J.; Truhlar, D. G., Universal Solvation Model Based on Solute Electron Density and on a Continuum Model of the Solvent Defined by the Bulk Dielectric Constant and Atomic Surface Tensions. *J. Phys. Chem. B* **2009**, *113*, 6378-6396.

## Part IV: NMR Spectra

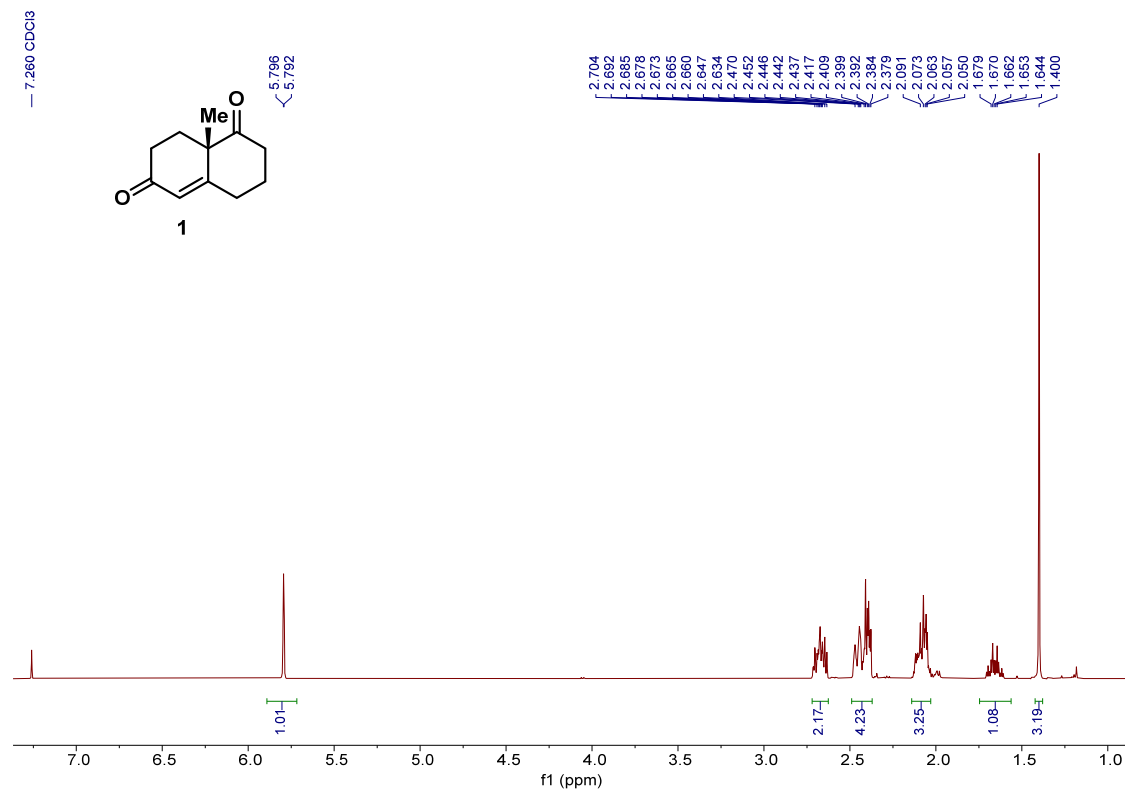

Figure S3. <sup>1</sup>H NMR Spectra of **1** (CDCl<sub>3</sub>, 500 MHz)

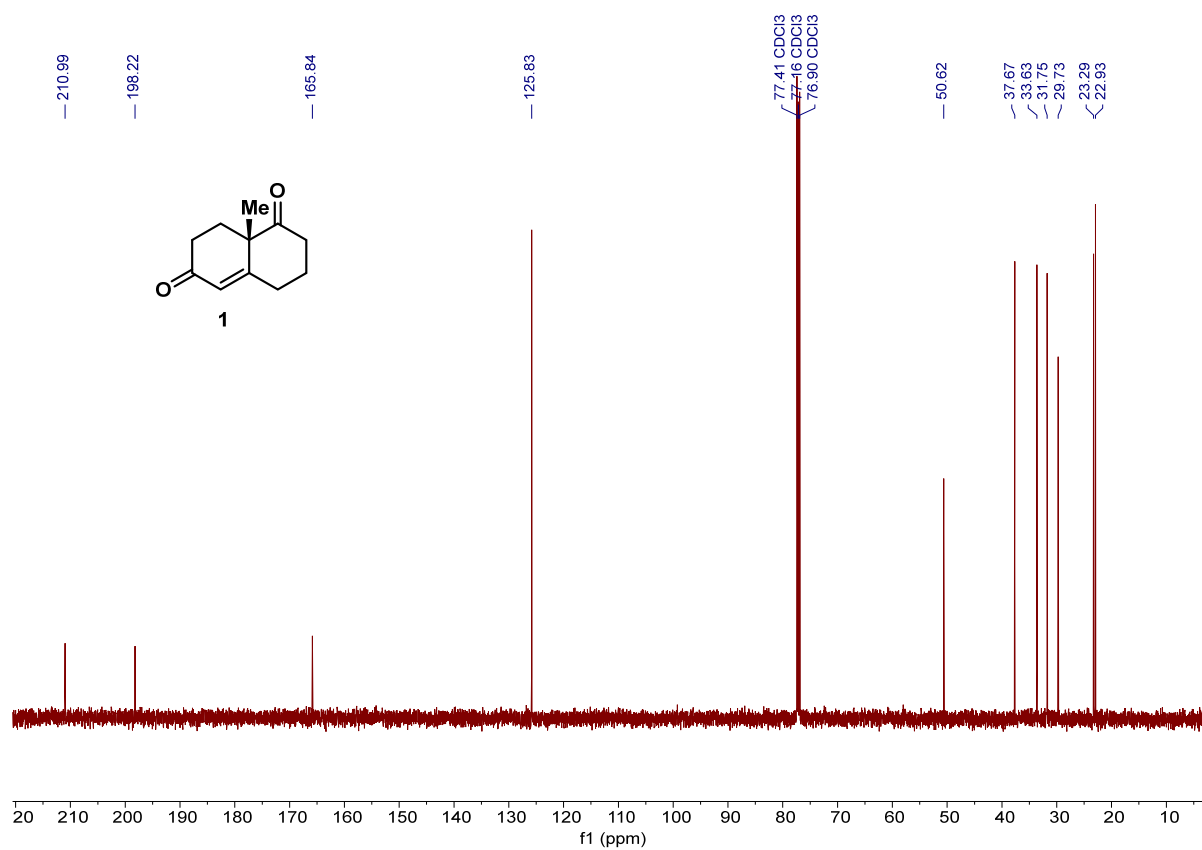

Figure S4. <sup>13</sup>C NMR Spectra of **1** (CDCl<sub>3</sub>, 125 MHz)



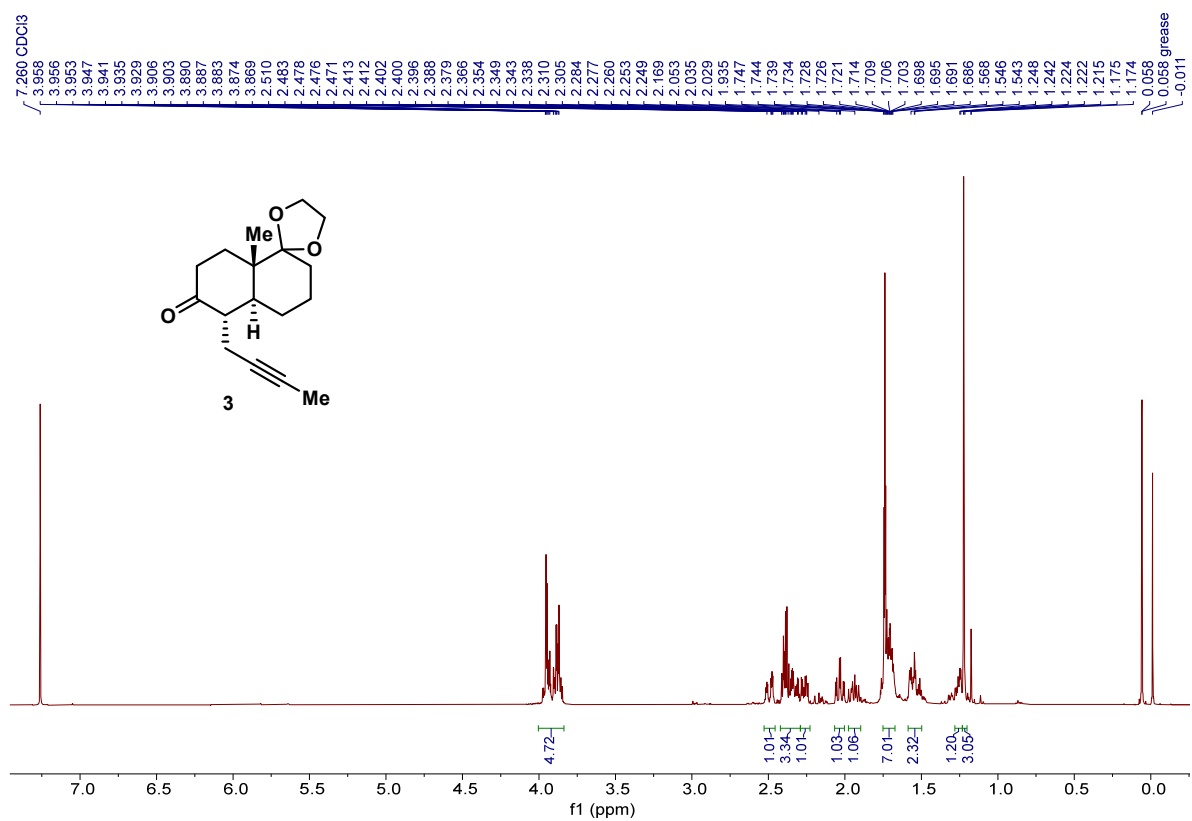

Figure S7.  $^1\text{H}$  NMR Spectra of **3** ( $\text{CDCl}_3$ , 500 MHz)

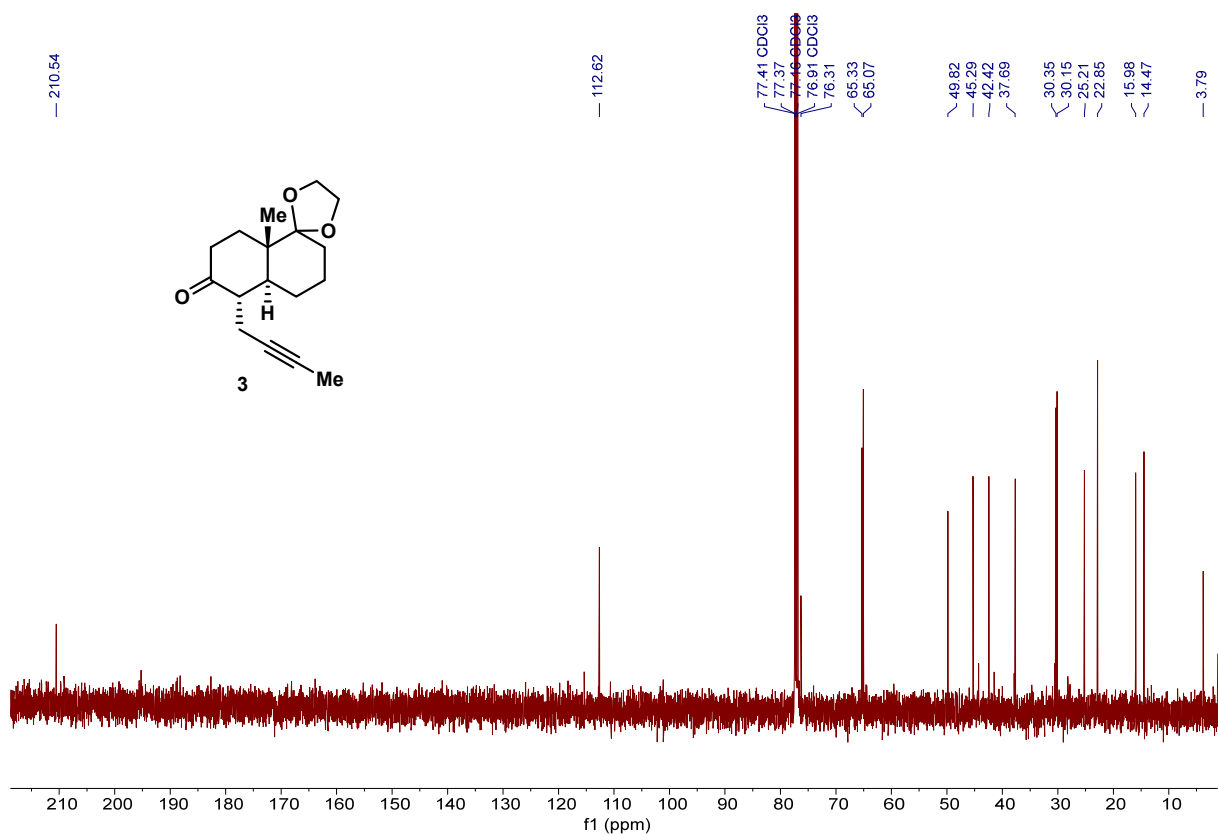

Figure S8.  $^{13}\text{C}$  NMR Spectra of **3** ( $\text{CDCl}_3$ , 125 MHz)

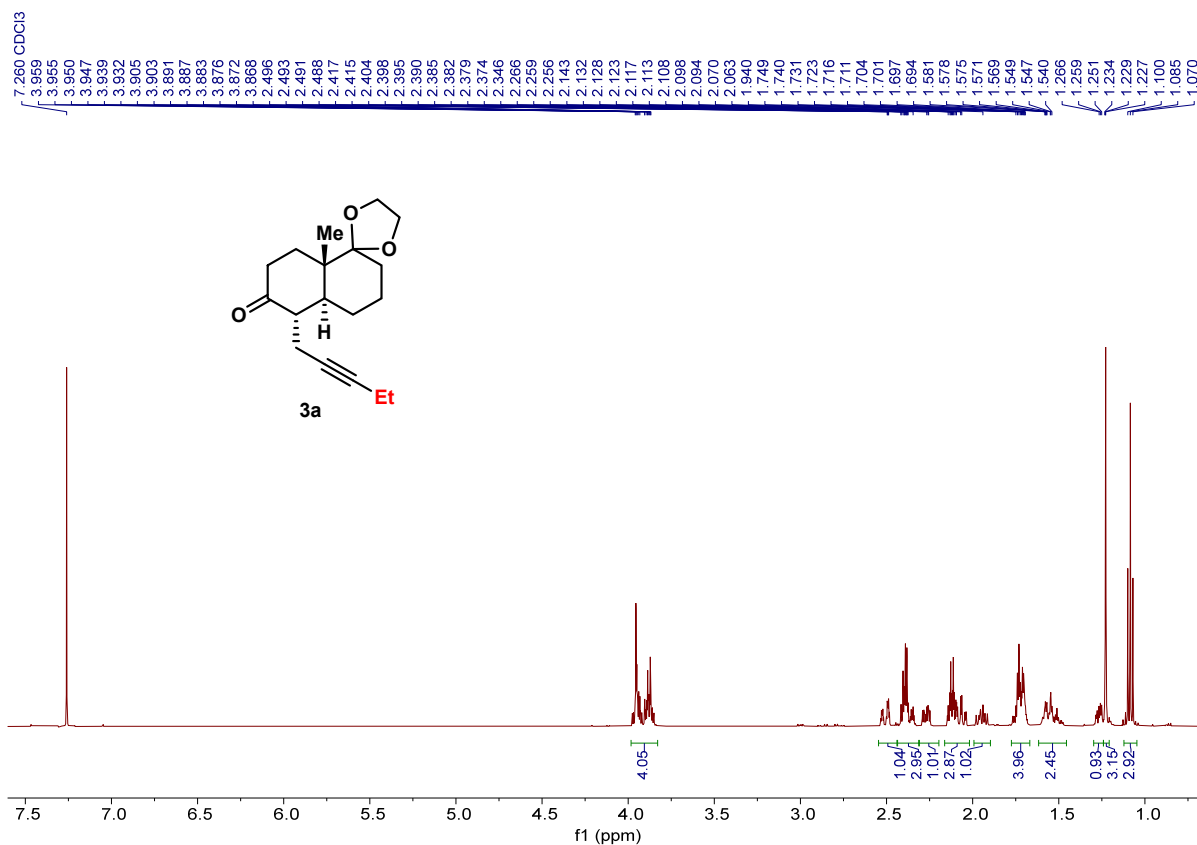

Figure S9. <sup>1</sup>H NMR Spectra of **3a** (CDCl<sub>3</sub>, 500 MHz)

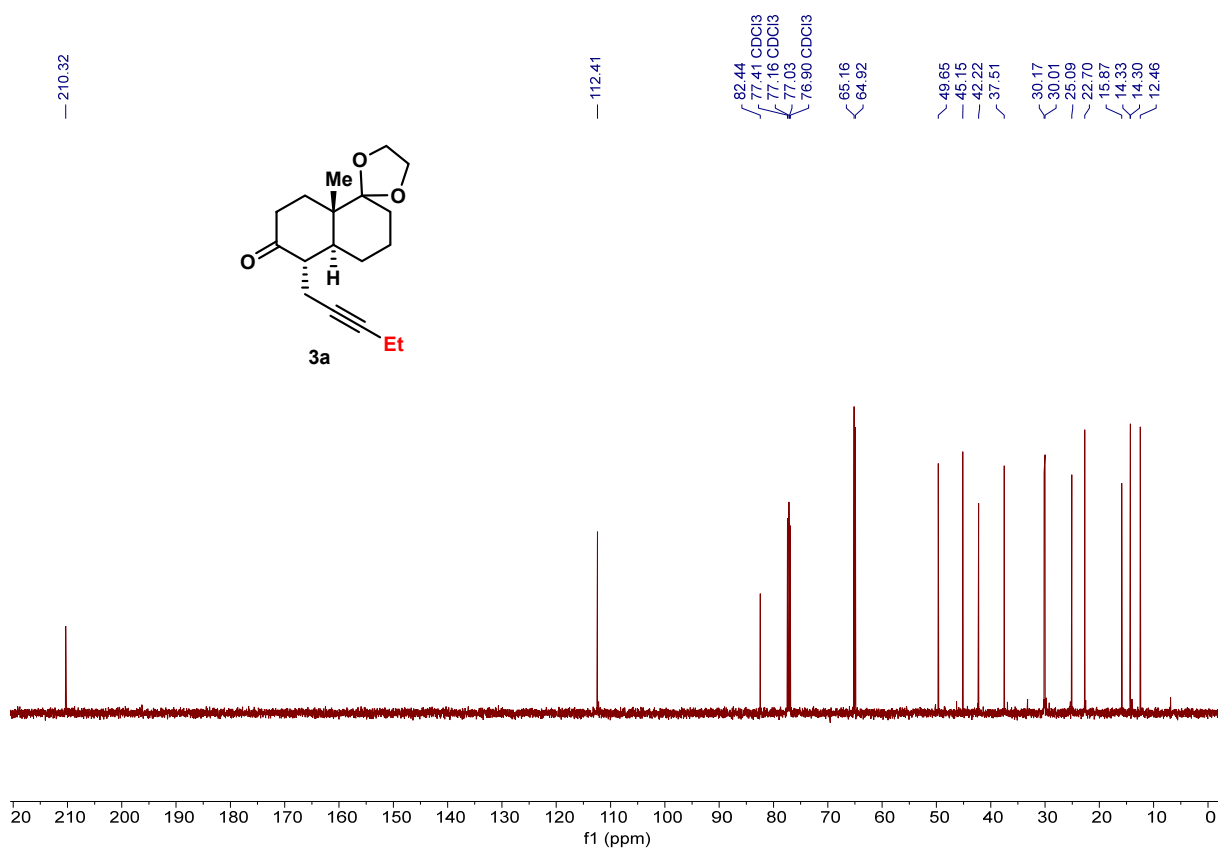

Figure S10. <sup>13</sup>C NMR Spectra of **3a** (CDCl<sub>3</sub>, 125 MHz)

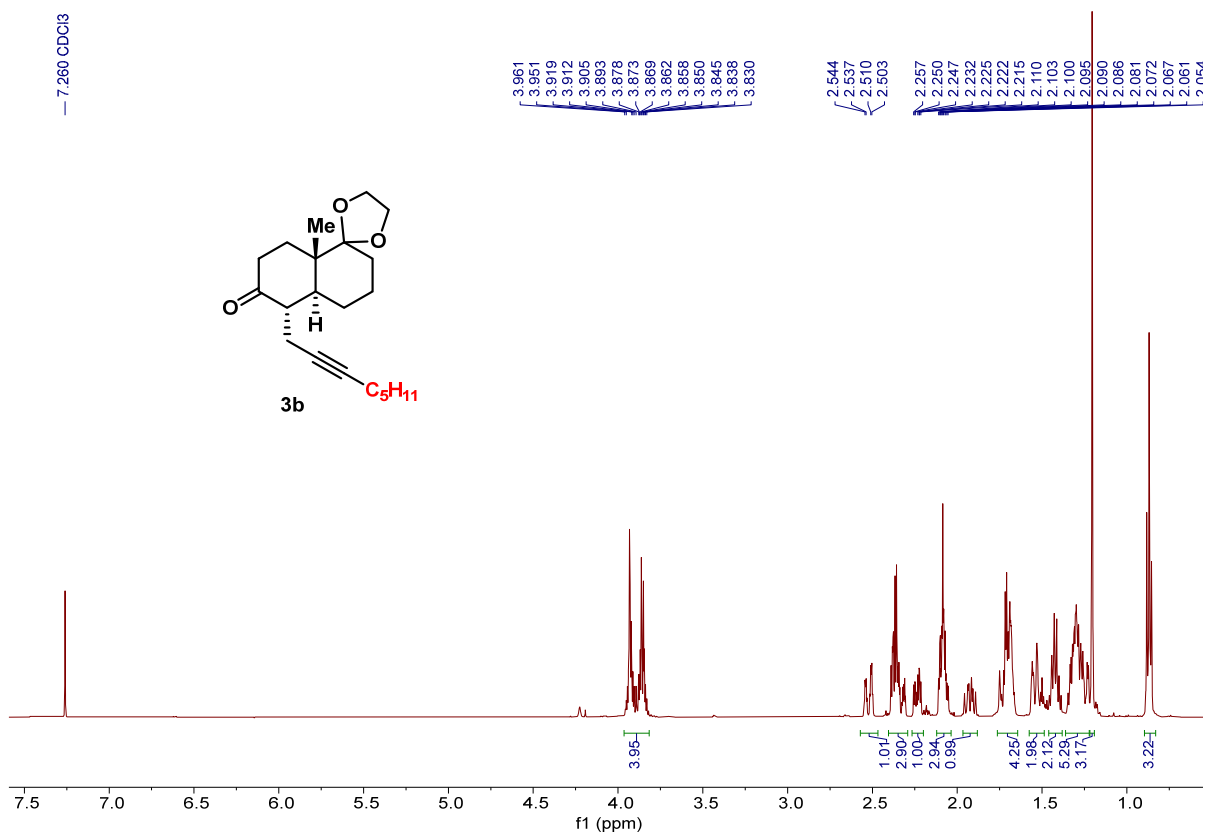

Figure S11. <sup>1</sup>H NMR Spectra of **3b** (CDCl<sub>3</sub>, 500 MHz)

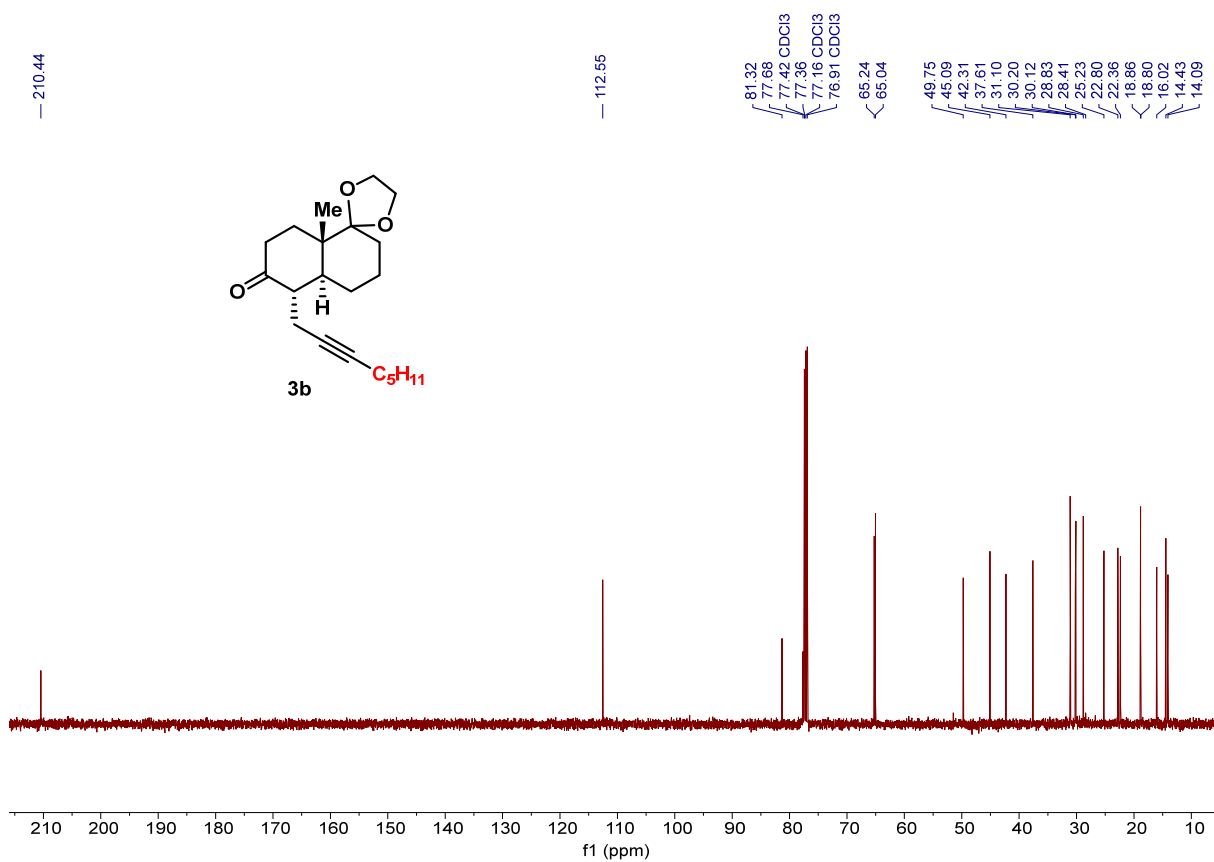

Figure S12. <sup>13</sup>C NMR Spectra of **3b** (CDCl<sub>3</sub>, 125 MHz)



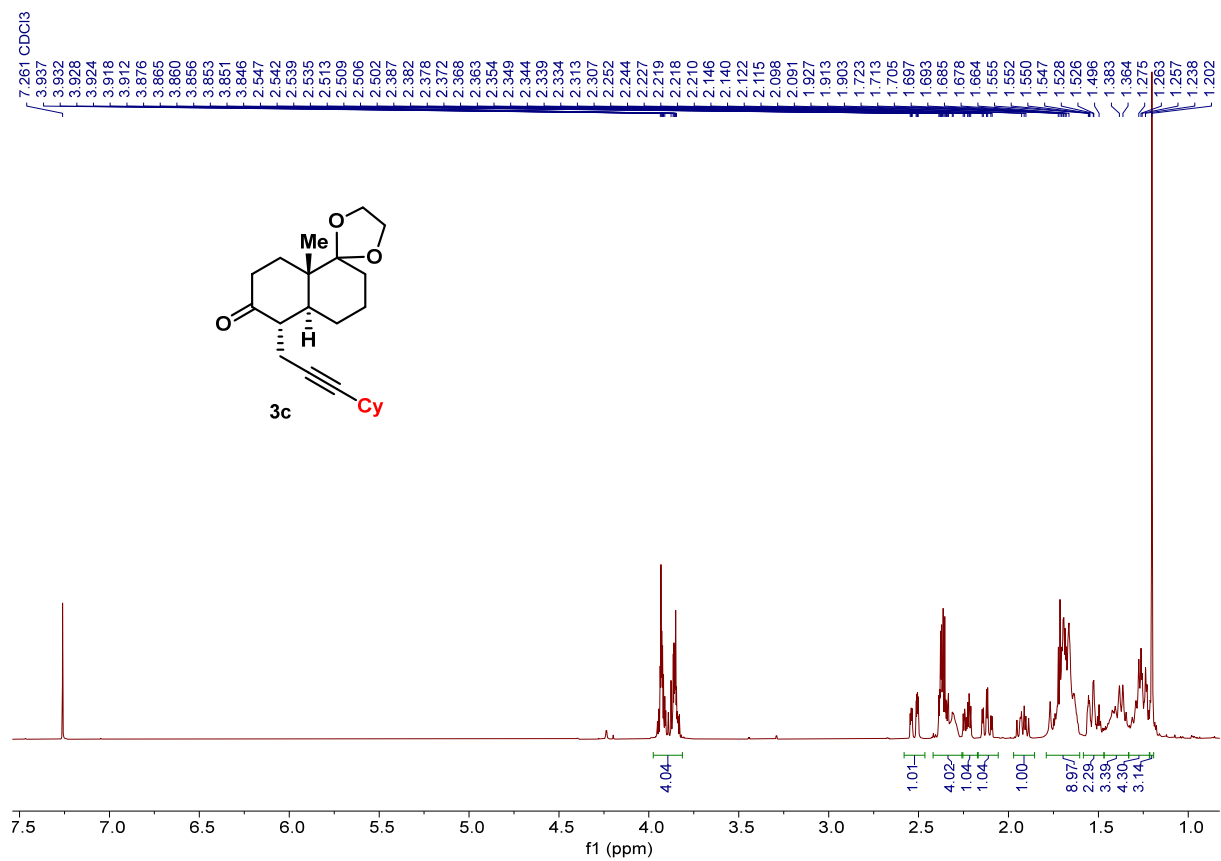

Figure S13.  $^1\text{H}$  NMR Spectra of **3c** ( $\text{CDCl}_3$ , 500 MHz)

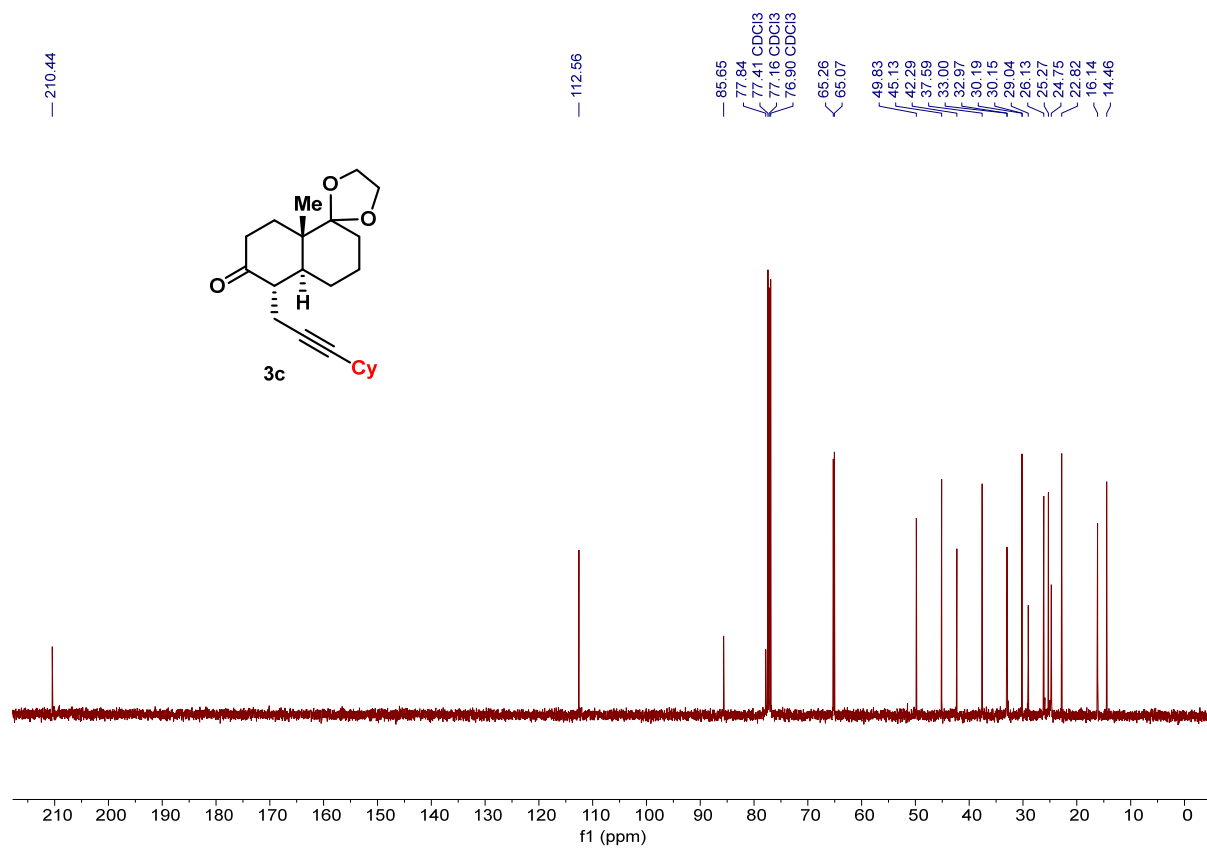

Figure S14.  $^{13}\text{C}$  NMR Spectra of **3c** ( $\text{CDCl}_3$ , 125 MHz)

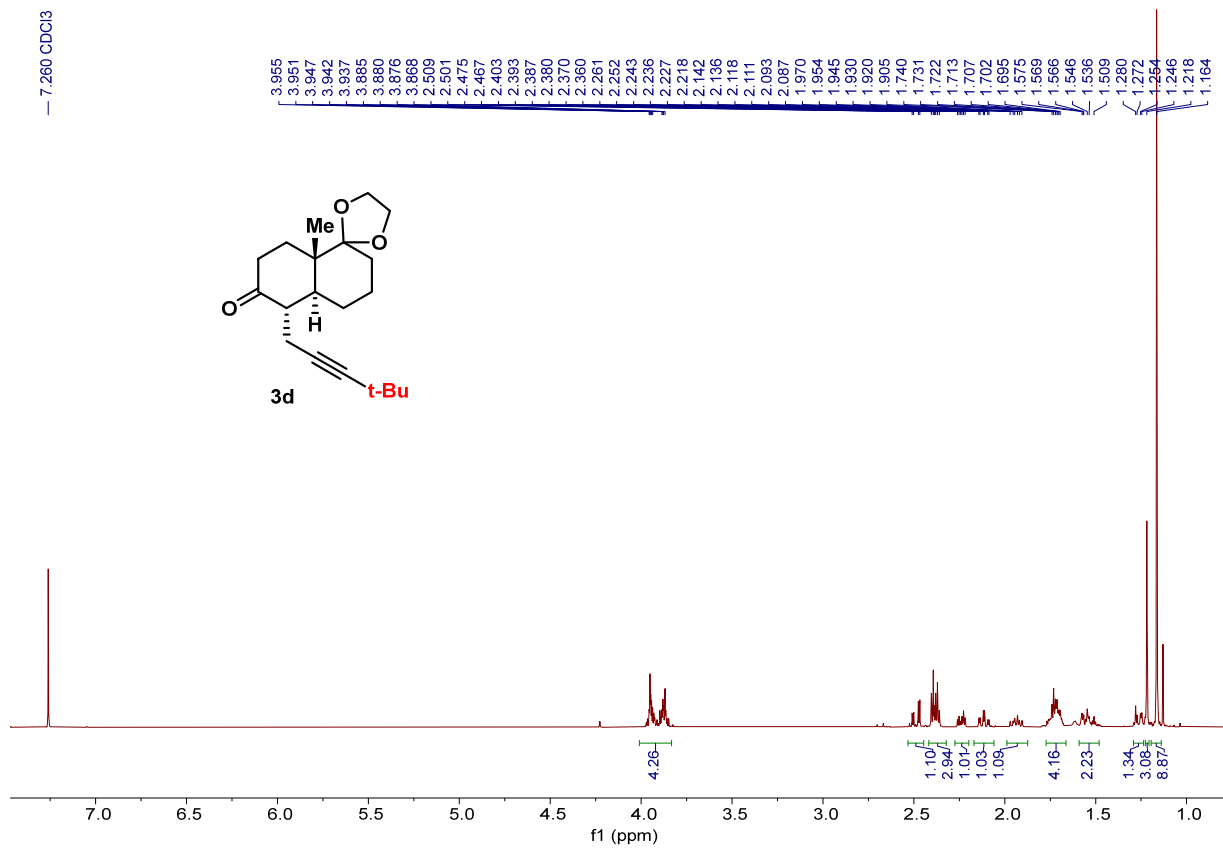

Figure S15. <sup>1</sup>H NMR Spectra of **3d** (CDCl<sub>3</sub>, 500 MHz)

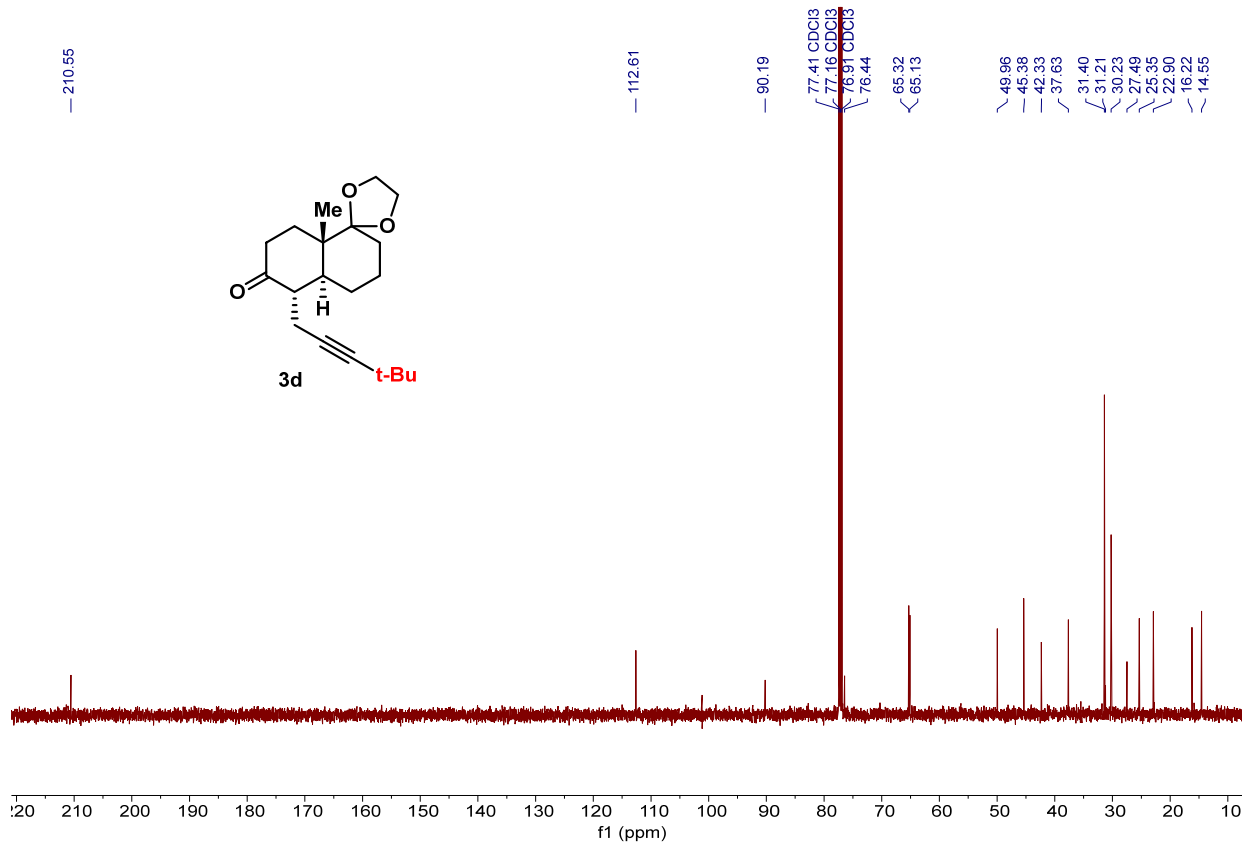

Figure S16. <sup>13</sup>C NMR Spectra of **3d** (CDCl<sub>3</sub>, 125 MHz)

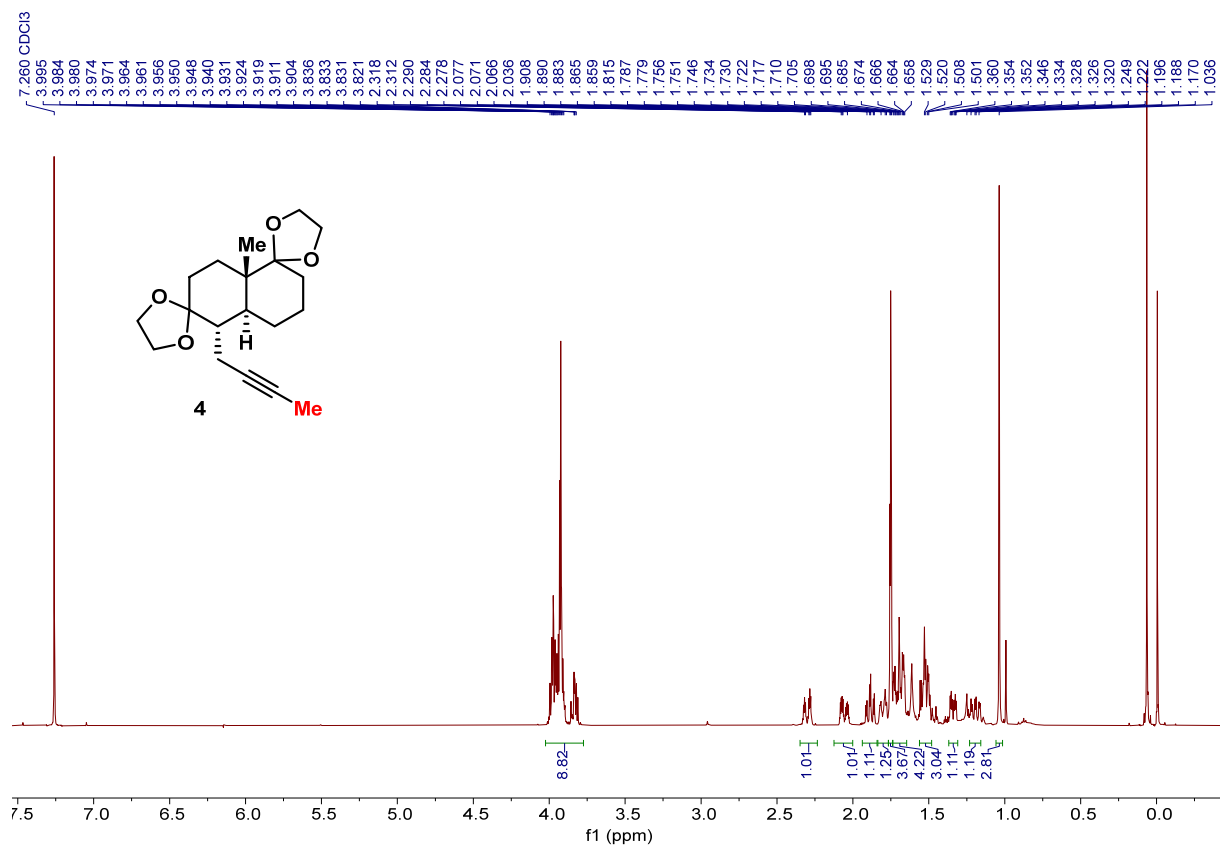

Figure S17. <sup>1</sup>H NMR Spectra of **4** (CDCl<sub>3</sub>, 500 MHz)

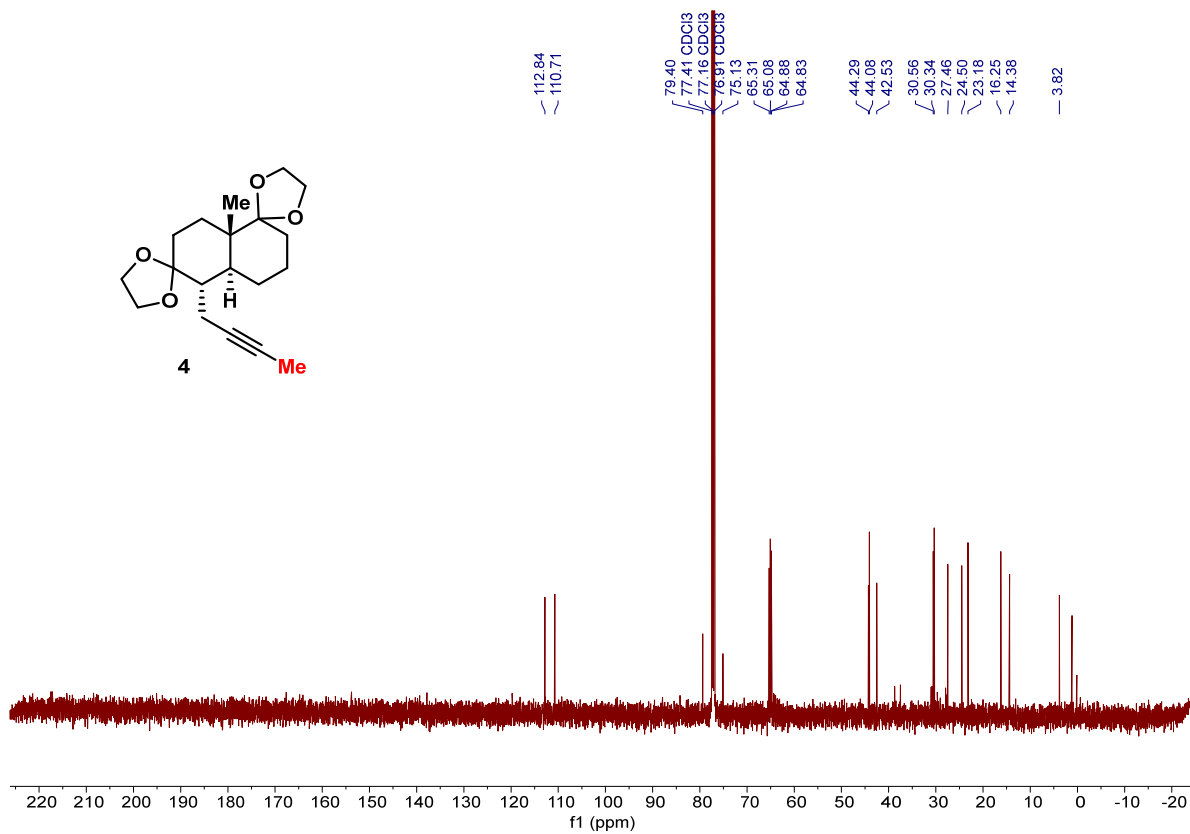

Figure S18. <sup>13</sup>C NMR Spectra of **4** (CDCl<sub>3</sub>, 125 MHz)

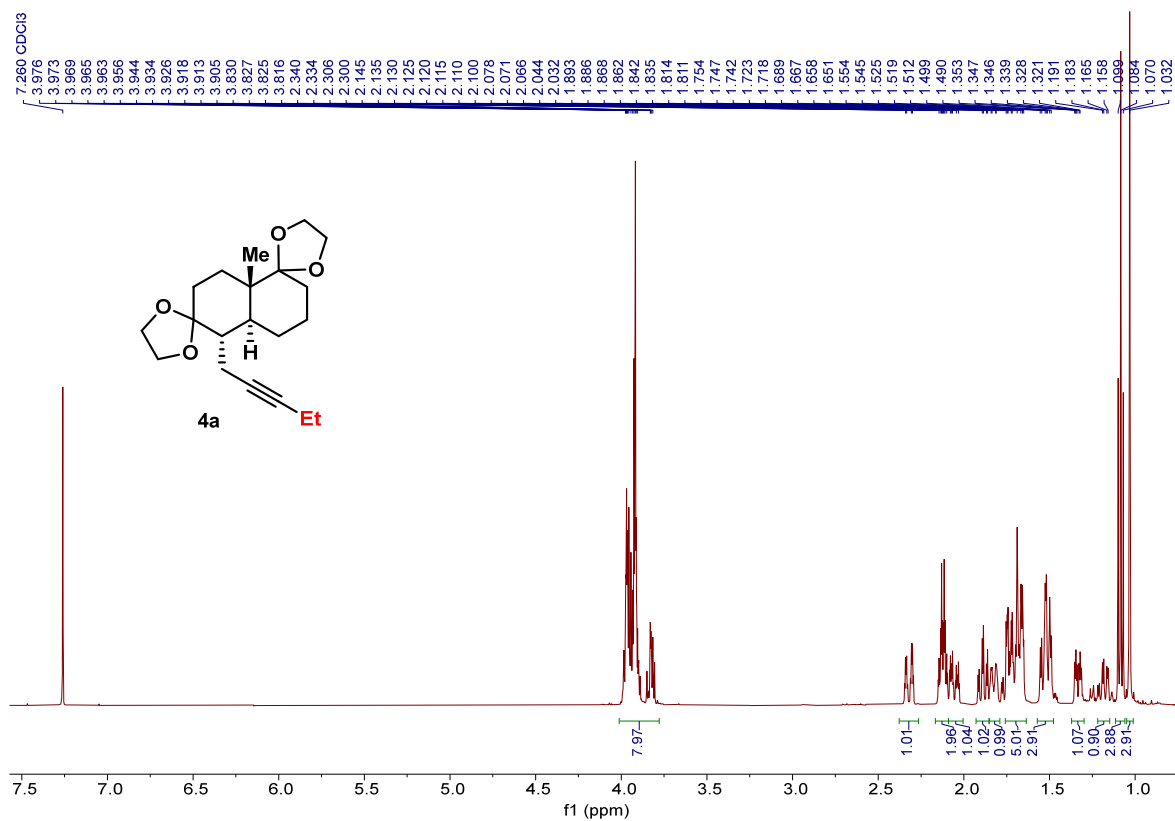

Figure S19. <sup>1</sup>H NMR Spectra of 4a (CDCl<sub>3</sub>, 500 MHz)

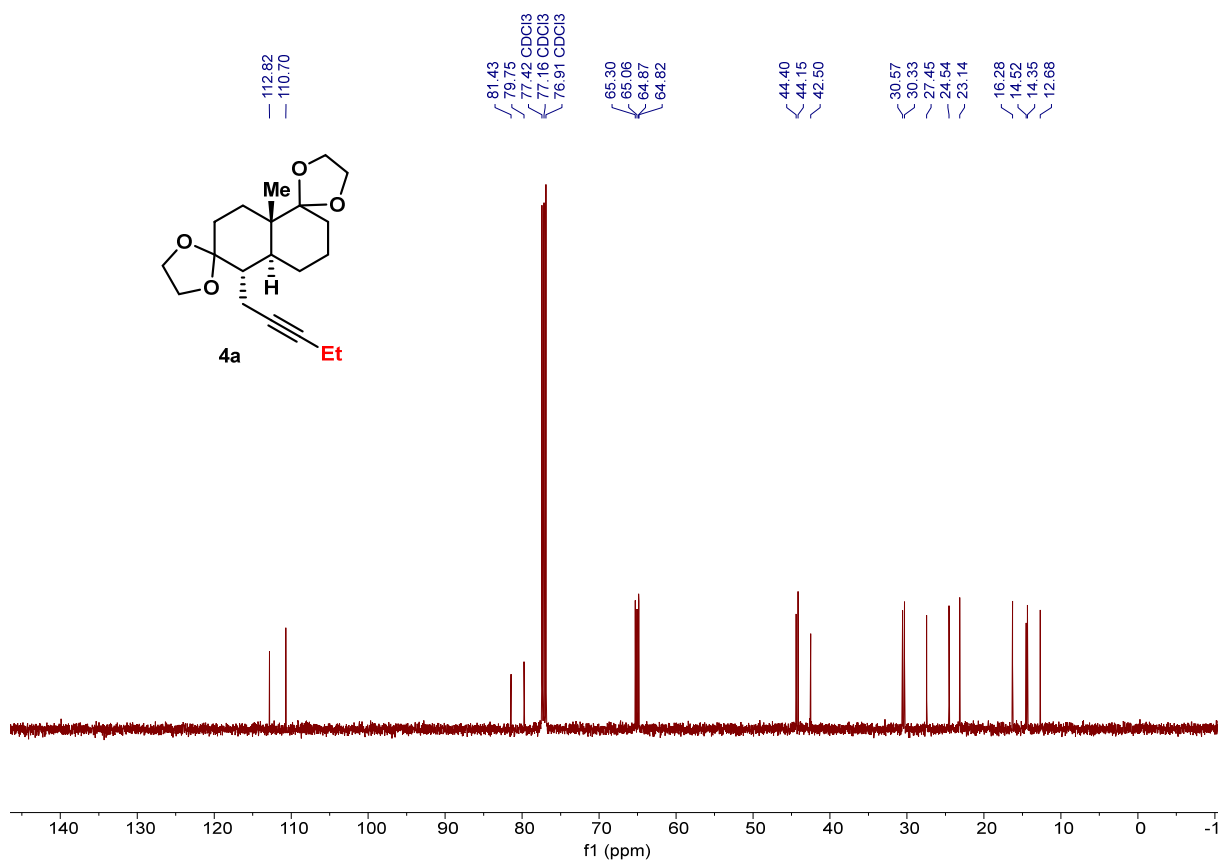

Figure S20. <sup>13</sup>C NMR Spectra of 4a (CDCl<sub>3</sub>, 125 MHz)

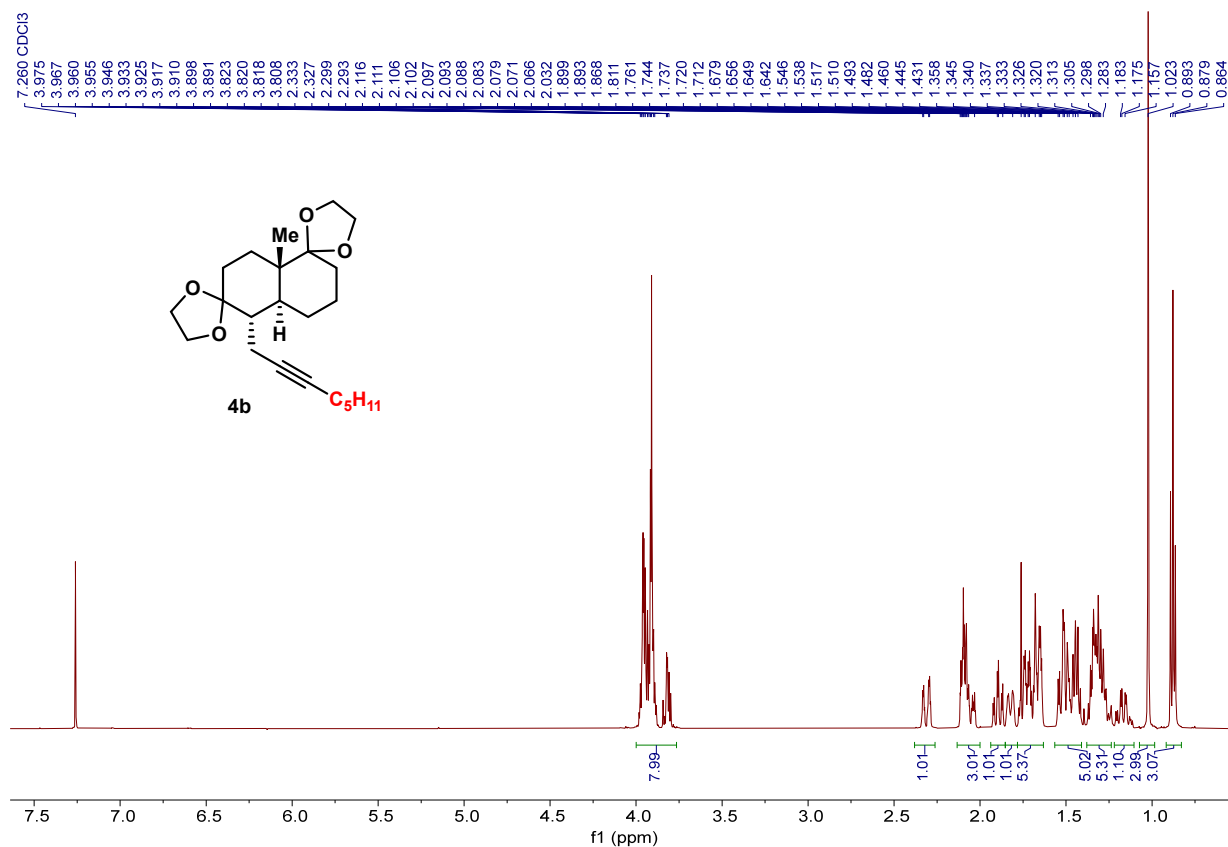

Figure S21. <sup>1</sup>H NMR Spectra of **4b** (CDCl<sub>3</sub>, 500 MHz)

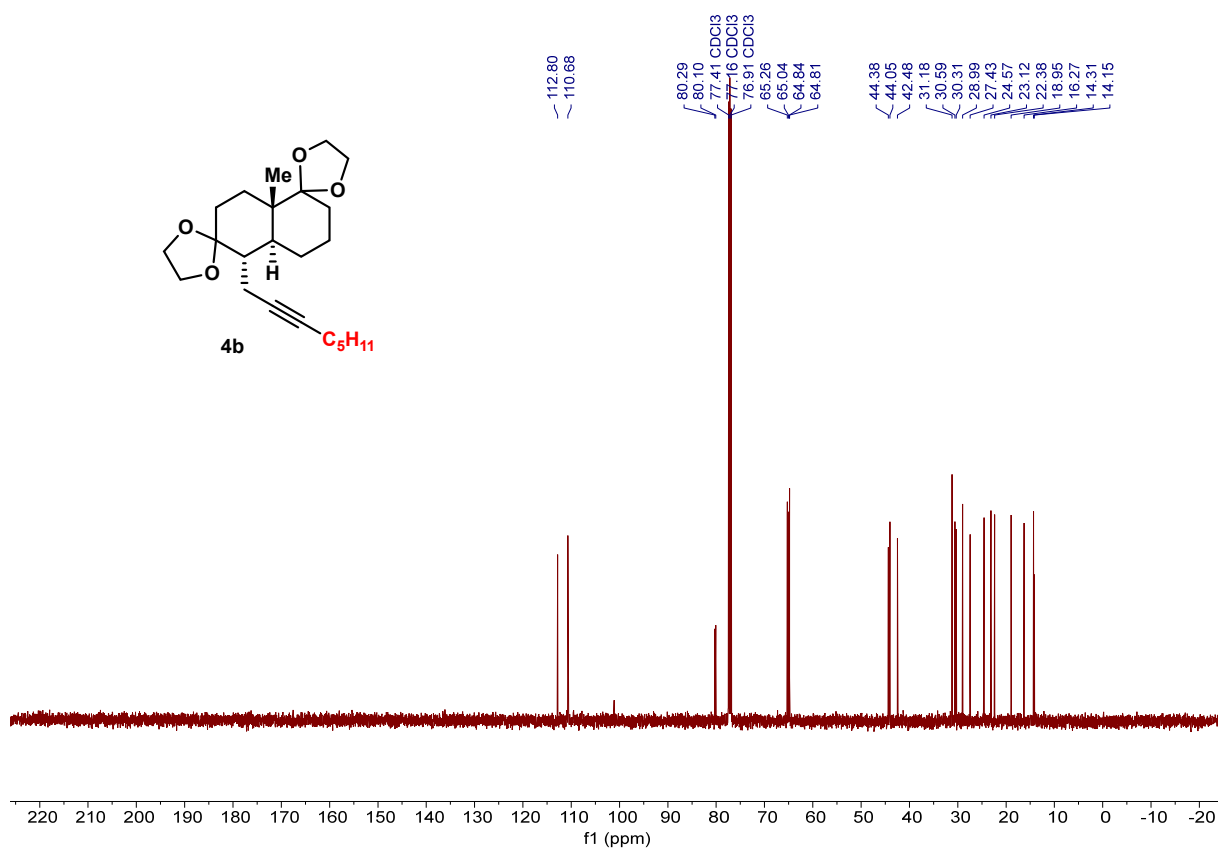

Figure S22. <sup>13</sup>C NMR Spectra of **4b** (CDCl<sub>3</sub>, 125 MHz)



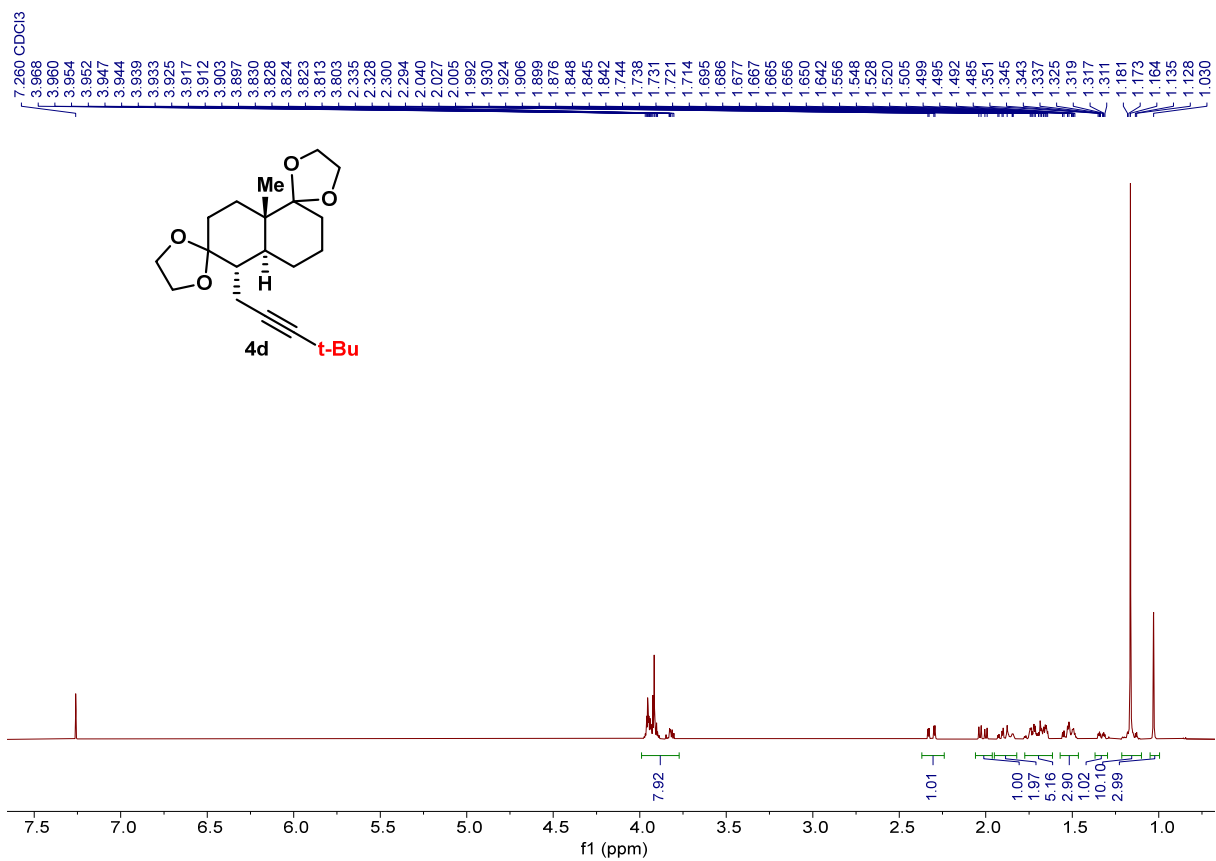

Figure S25. <sup>1</sup>H NMR Spectra of **4d** (CDCl<sub>3</sub>, 500 MHz)

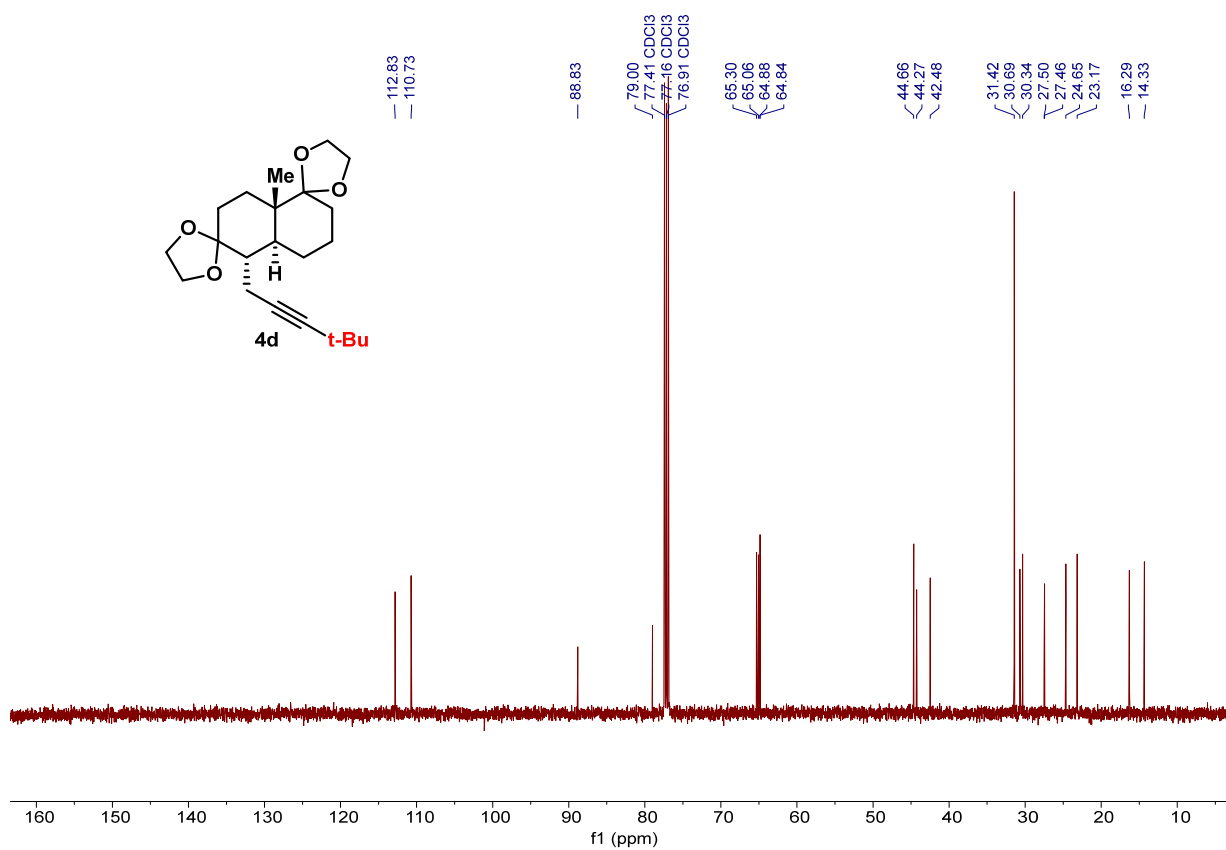

Figure S26. <sup>13</sup>C NMR Spectra of **4d** (CDCl<sub>3</sub>, 125 MHz)

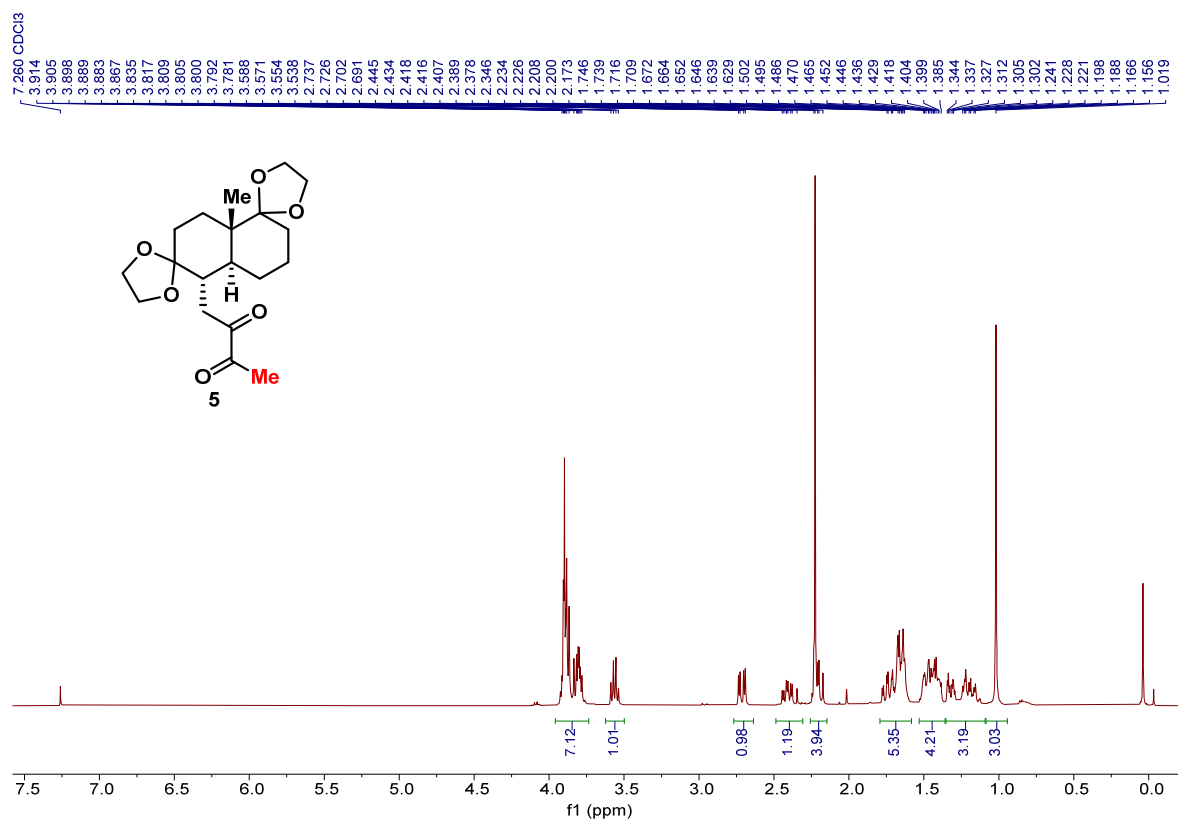

Figure S27. <sup>1</sup>H NMR Spectra of 5 (CDCl<sub>3</sub>, 400 MHz)

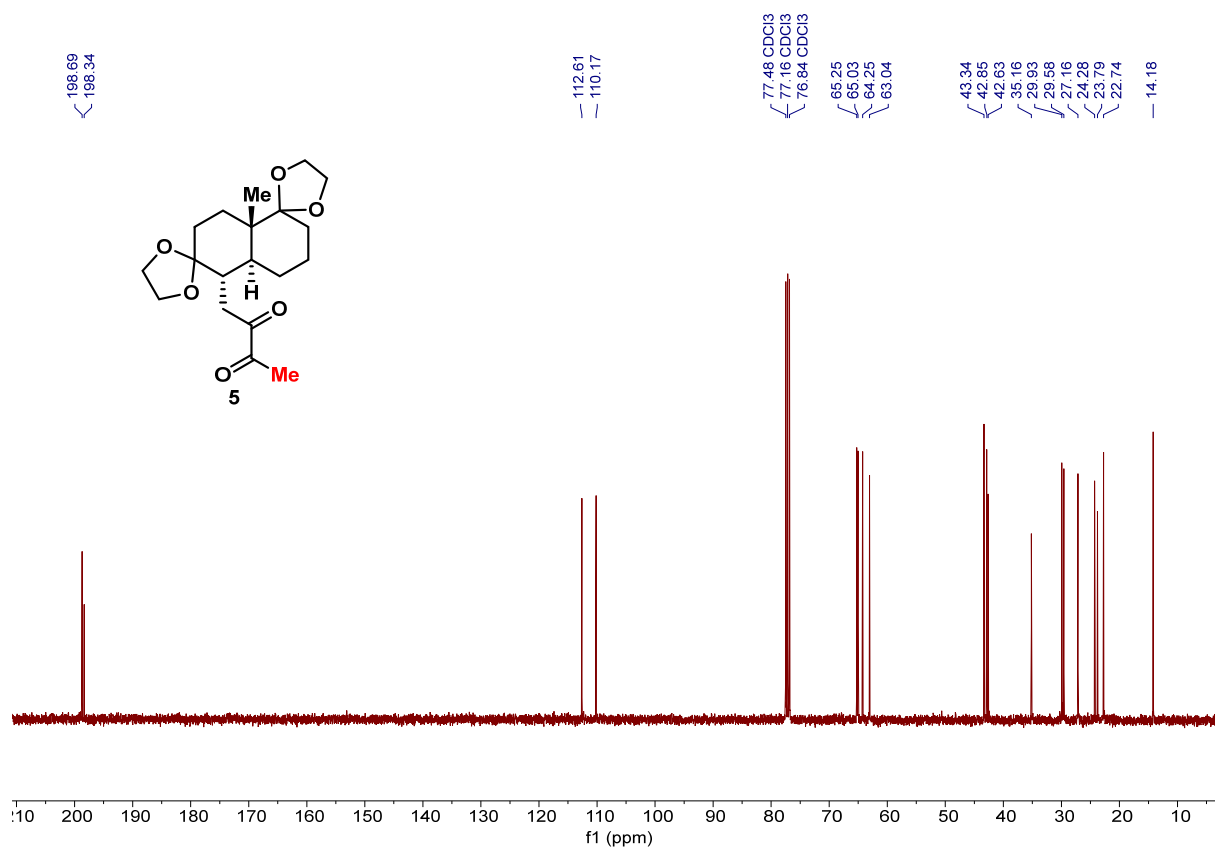

Figure S28. <sup>13</sup>C NMR Spectra of 5 (CDCl<sub>3</sub>, 100 MHz)



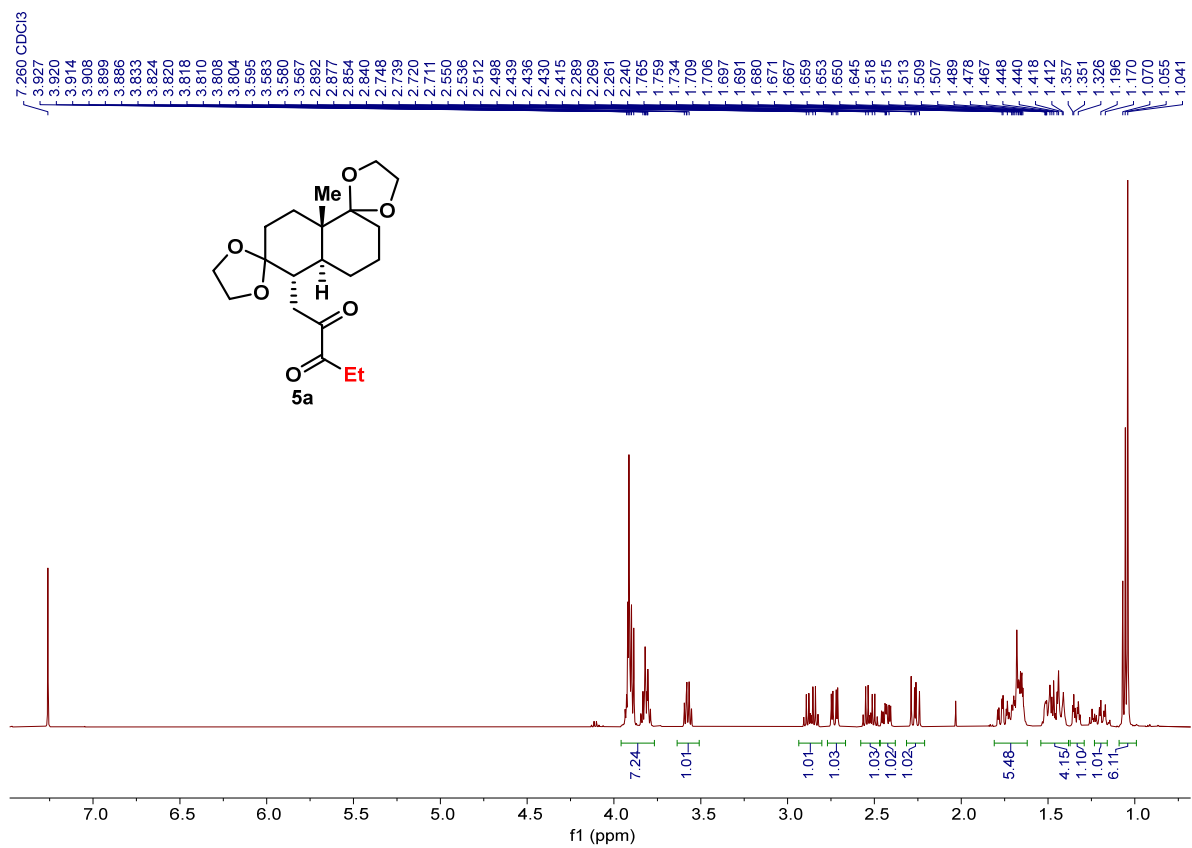

Figure S29. <sup>1</sup>H NMR Spectra of 5a (CDCl<sub>3</sub>, 500 MHz)

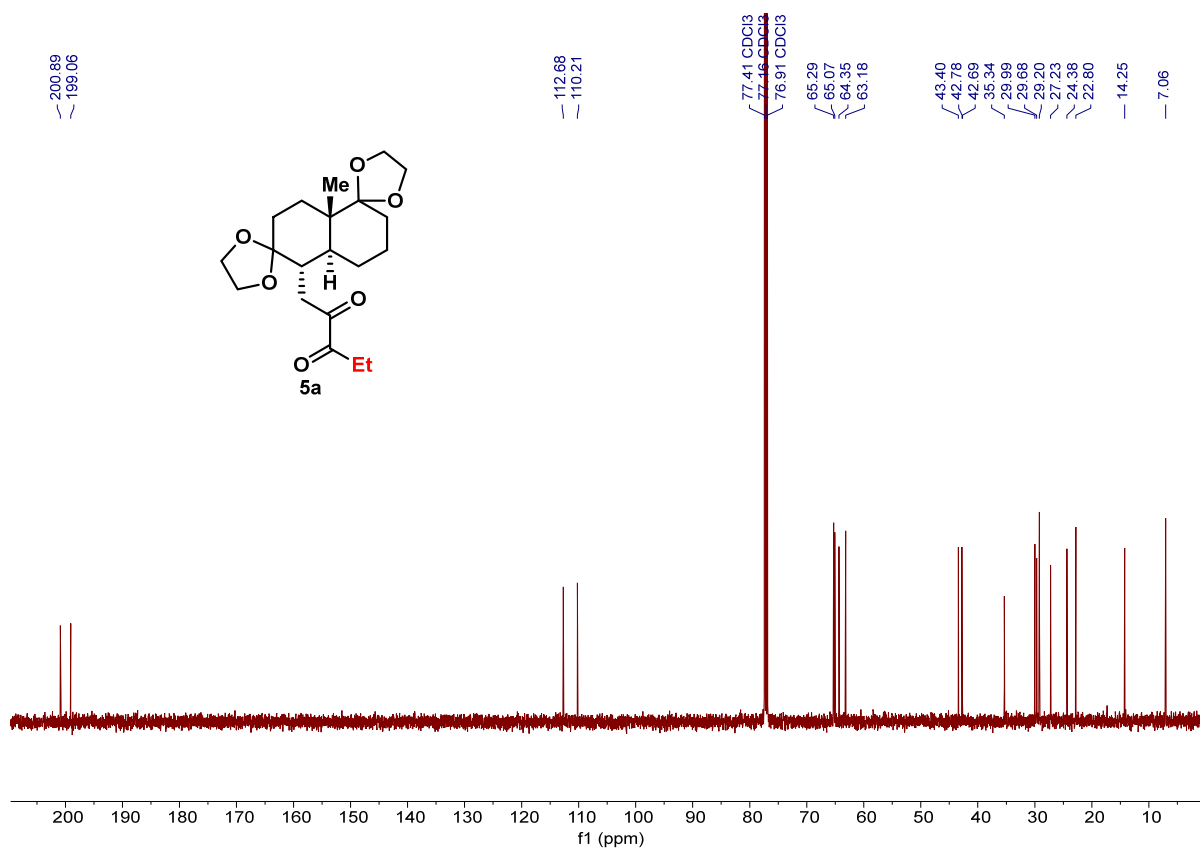

Figure S30. <sup>13</sup>C NMR Spectra of 5a (CDCl<sub>3</sub>, 125 MHz)

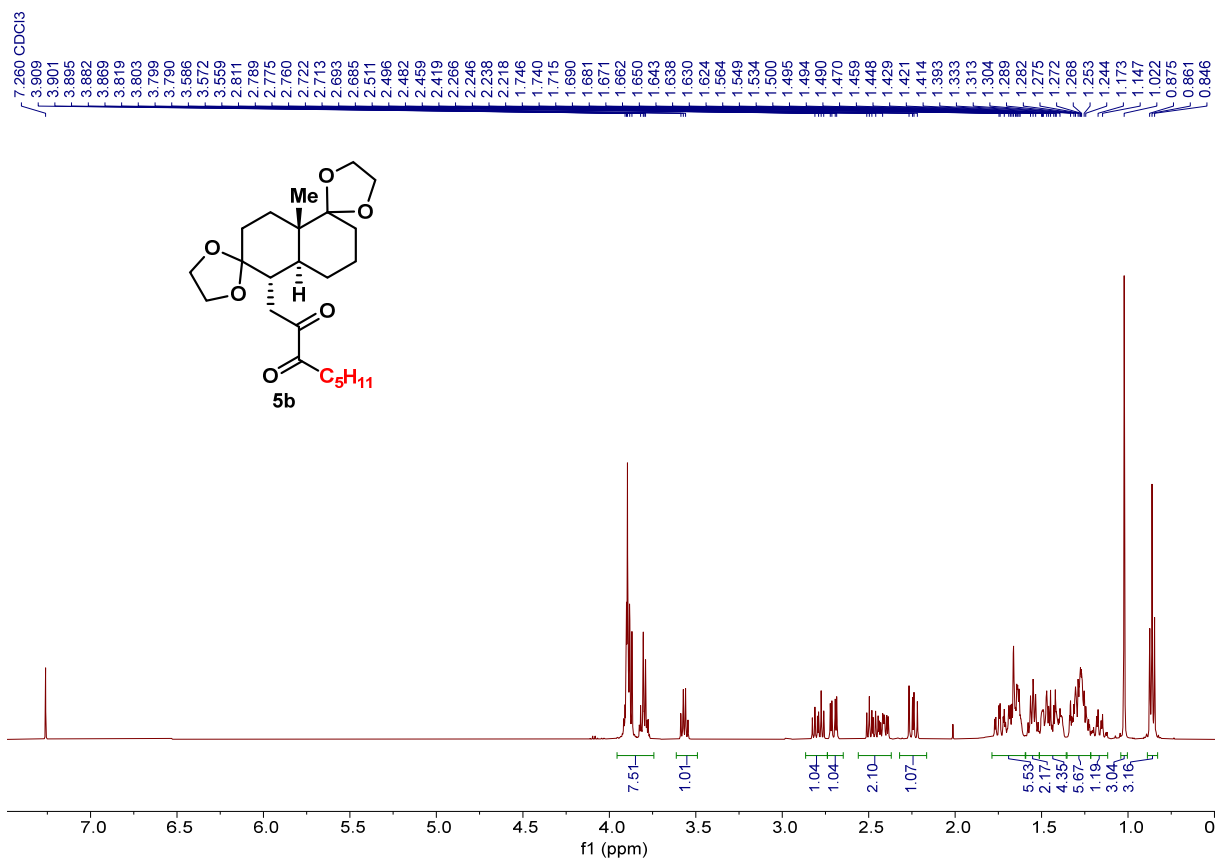

Figure S31. <sup>1</sup>H NMR Spectra of **5b** (CDCl<sub>3</sub>, 500 MHz)

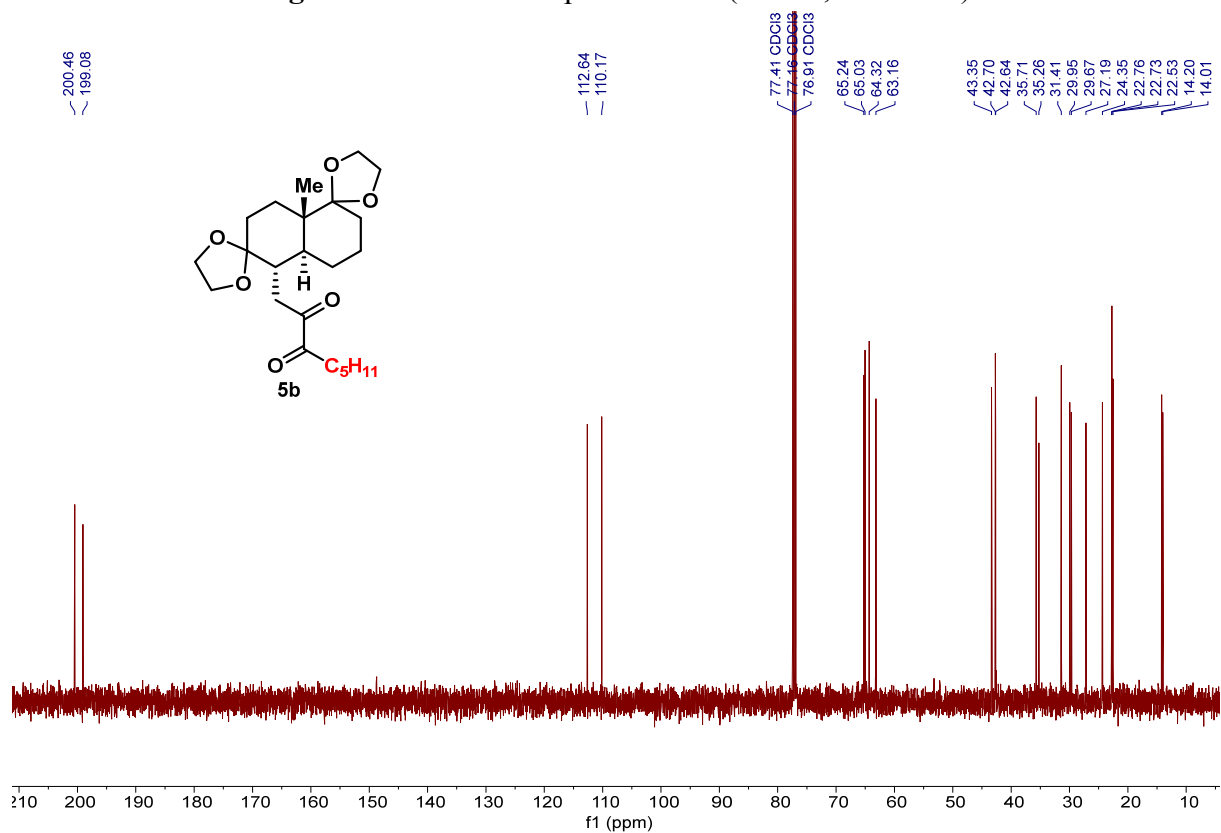

Figure S32. <sup>13</sup>C NMR Spectra of **5b** (CDCl<sub>3</sub>, 125 MHz)

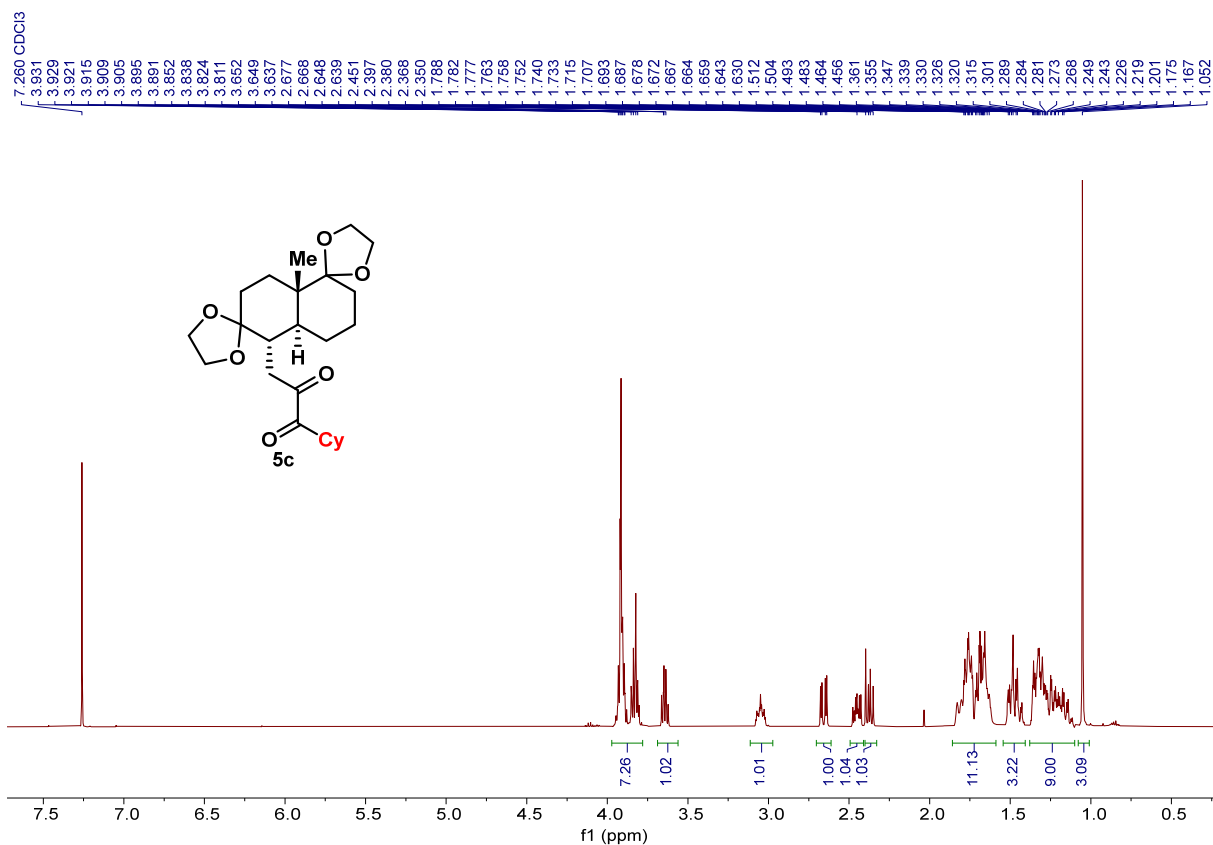

Figure S33. <sup>1</sup>H NMR Spectra of **5c** (CDCl<sub>3</sub>, 500 MHz)

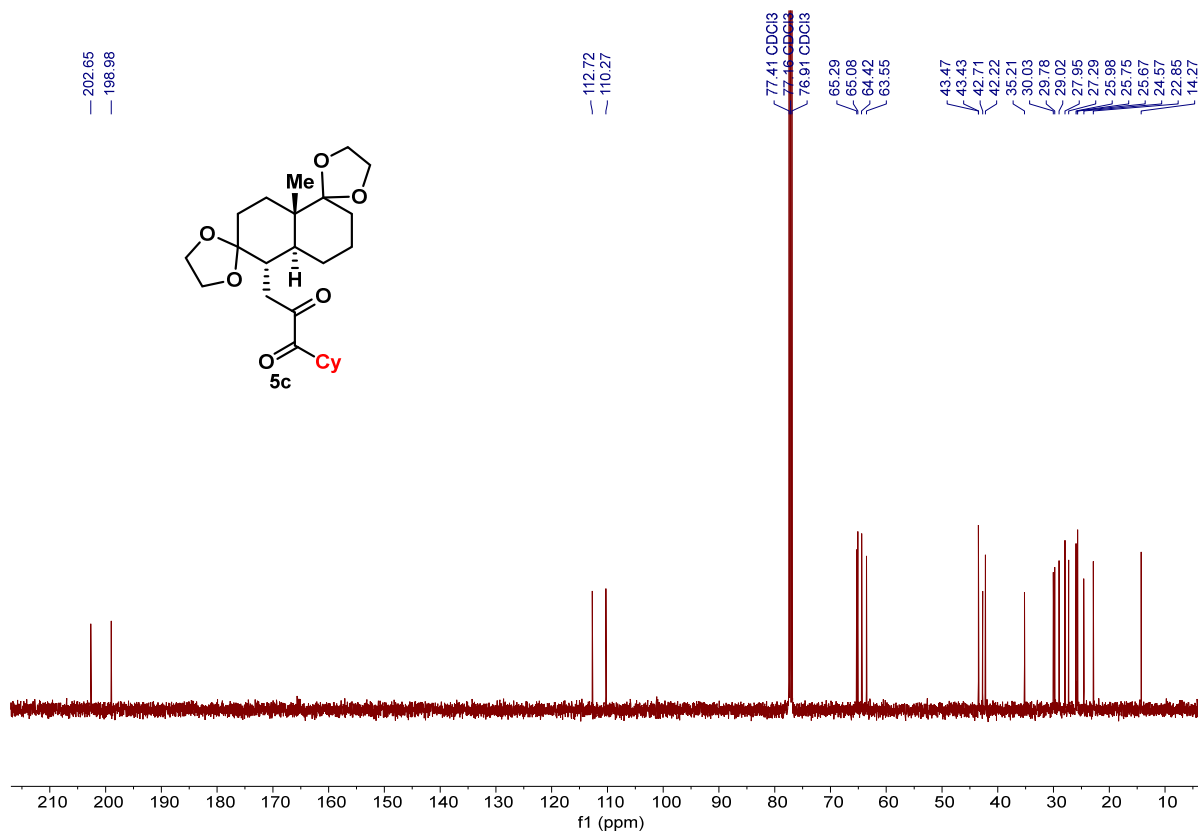

Figure S34. <sup>13</sup>C NMR Spectra of **5c** (CDCl<sub>3</sub>, 125 MHz)



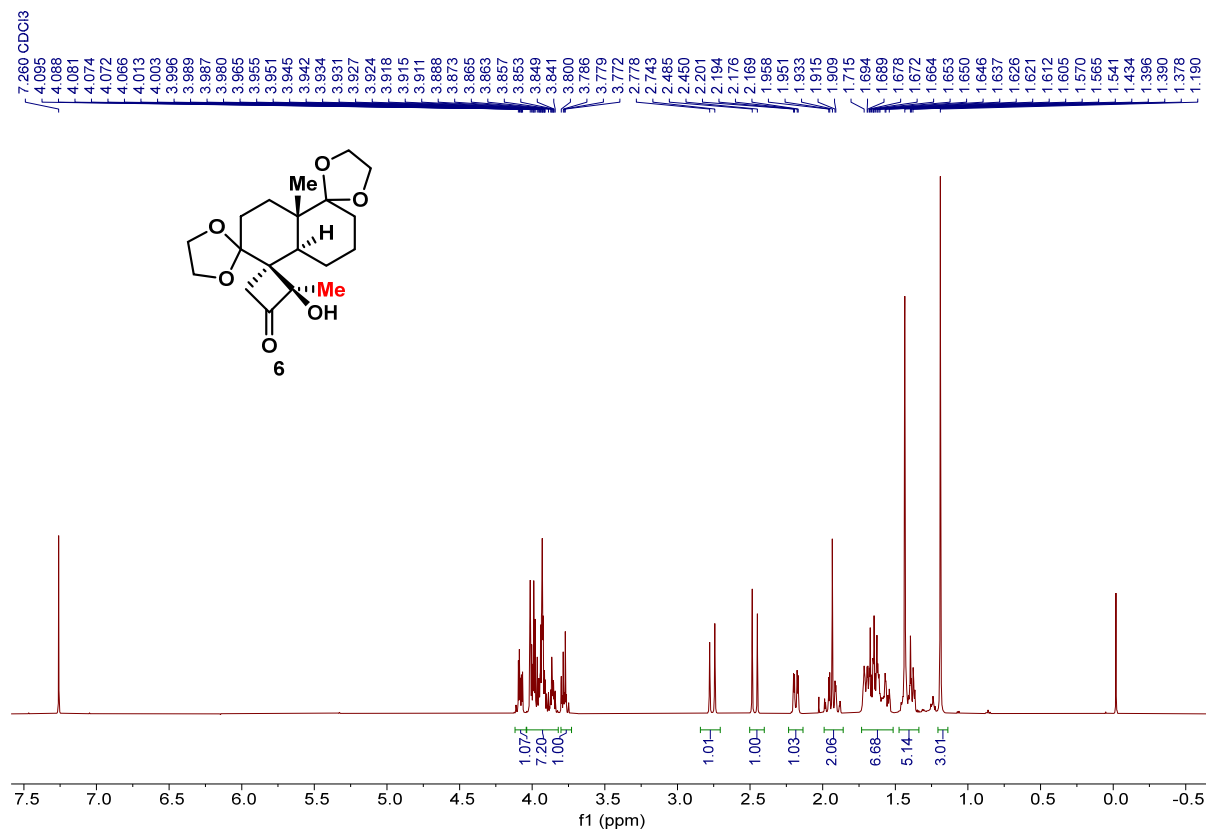

Figure S37. <sup>1</sup>H NMR Spectra of Compound 6 (CDCl<sub>3</sub>, 500 MHz)

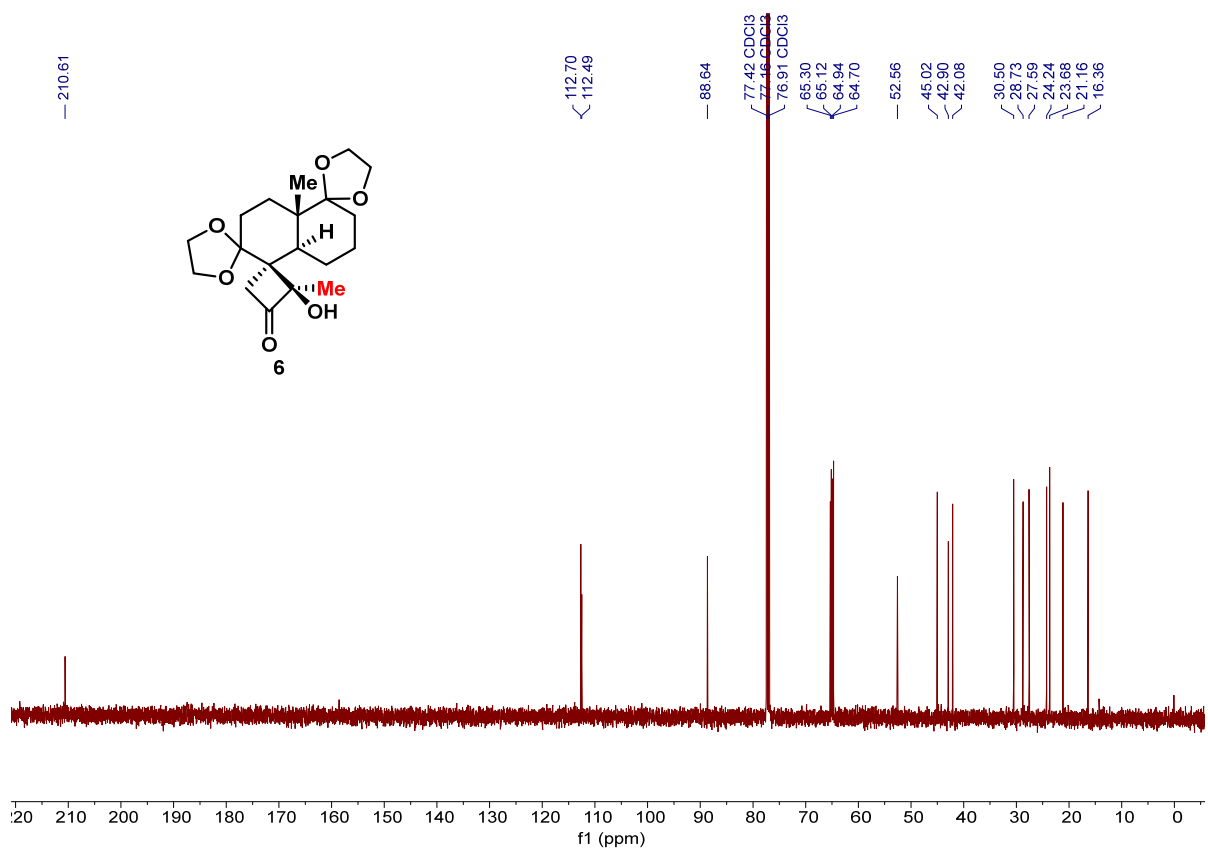

Figure S38. <sup>13</sup>C NMR Spectra of Compound 6 (CDCl<sub>3</sub>, 125 MHz)

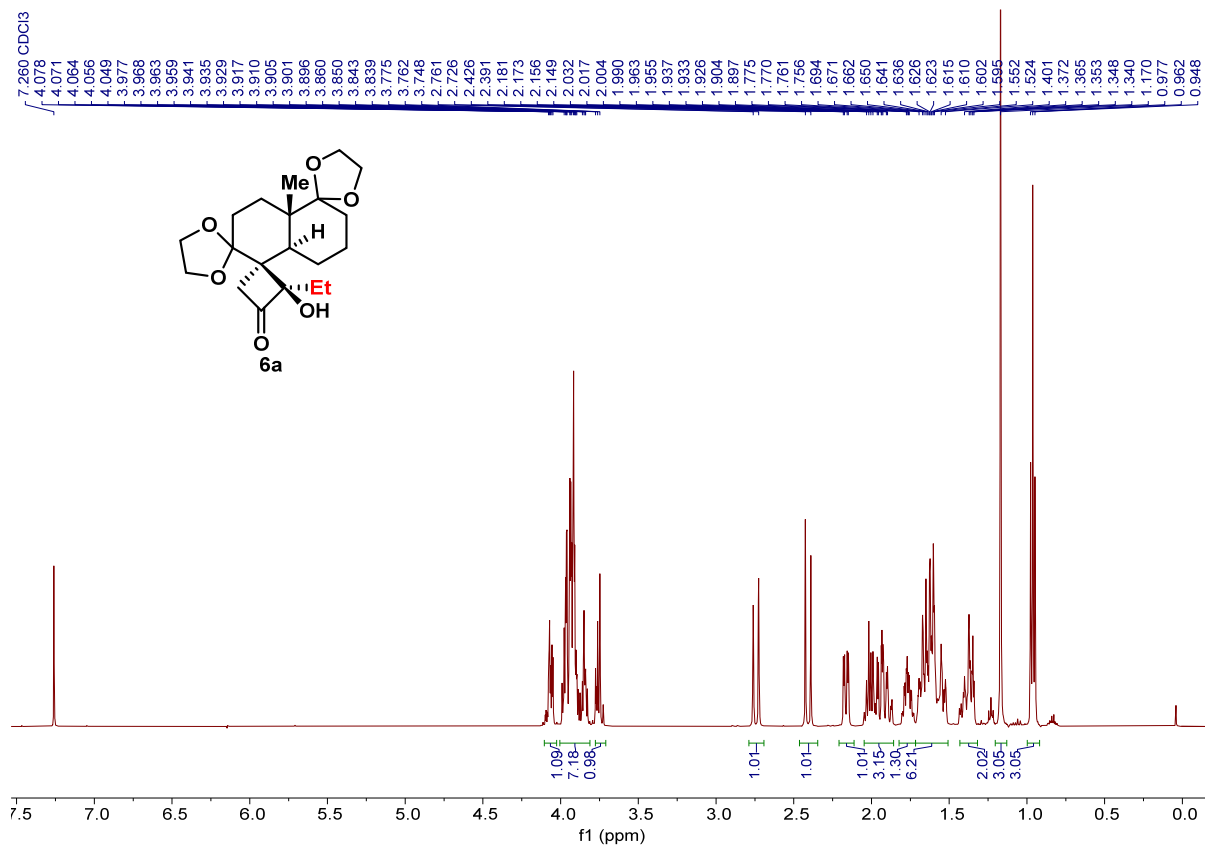

Figure S39. <sup>1</sup>H NMR Spectra of Compound 6a (CDCl<sub>3</sub>, 500 MHz)

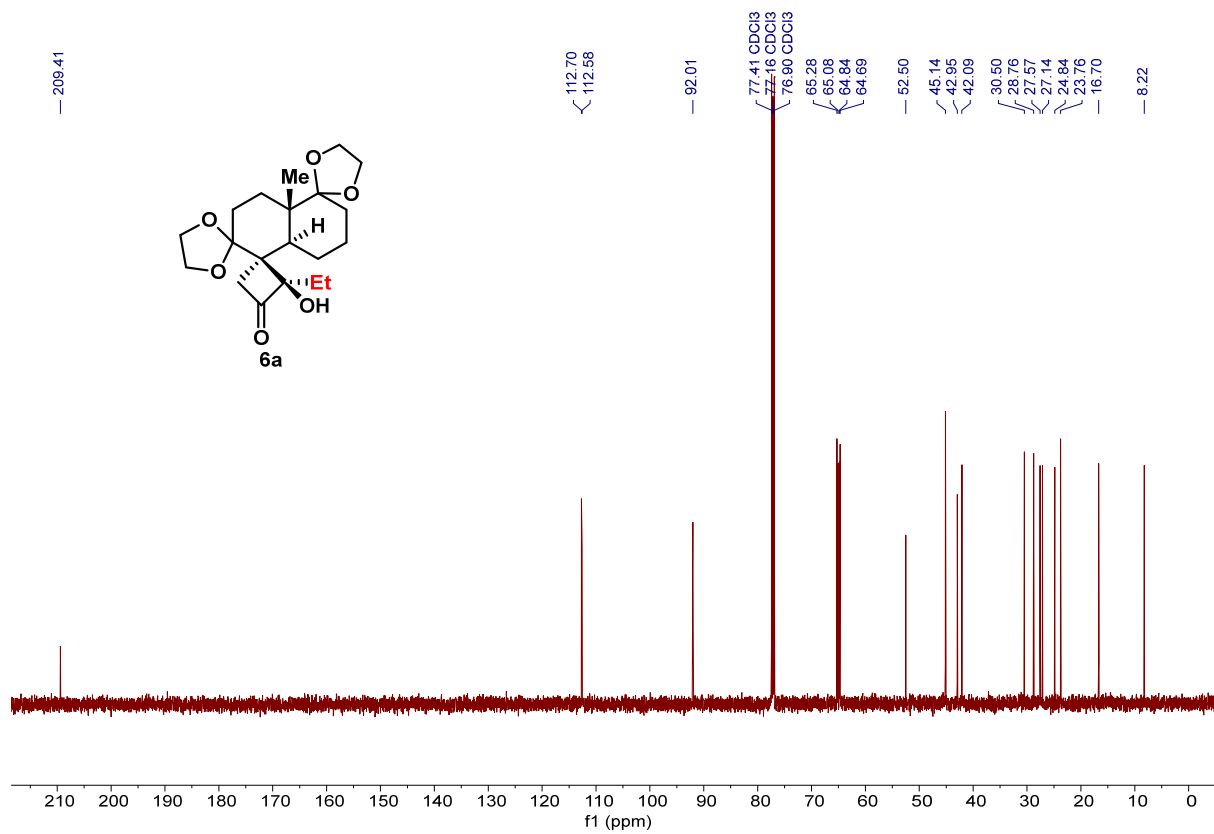

Figure S40. <sup>13</sup>C NMR Spectra of Compound 6a (CDCl<sub>3</sub>, 125 MHz)

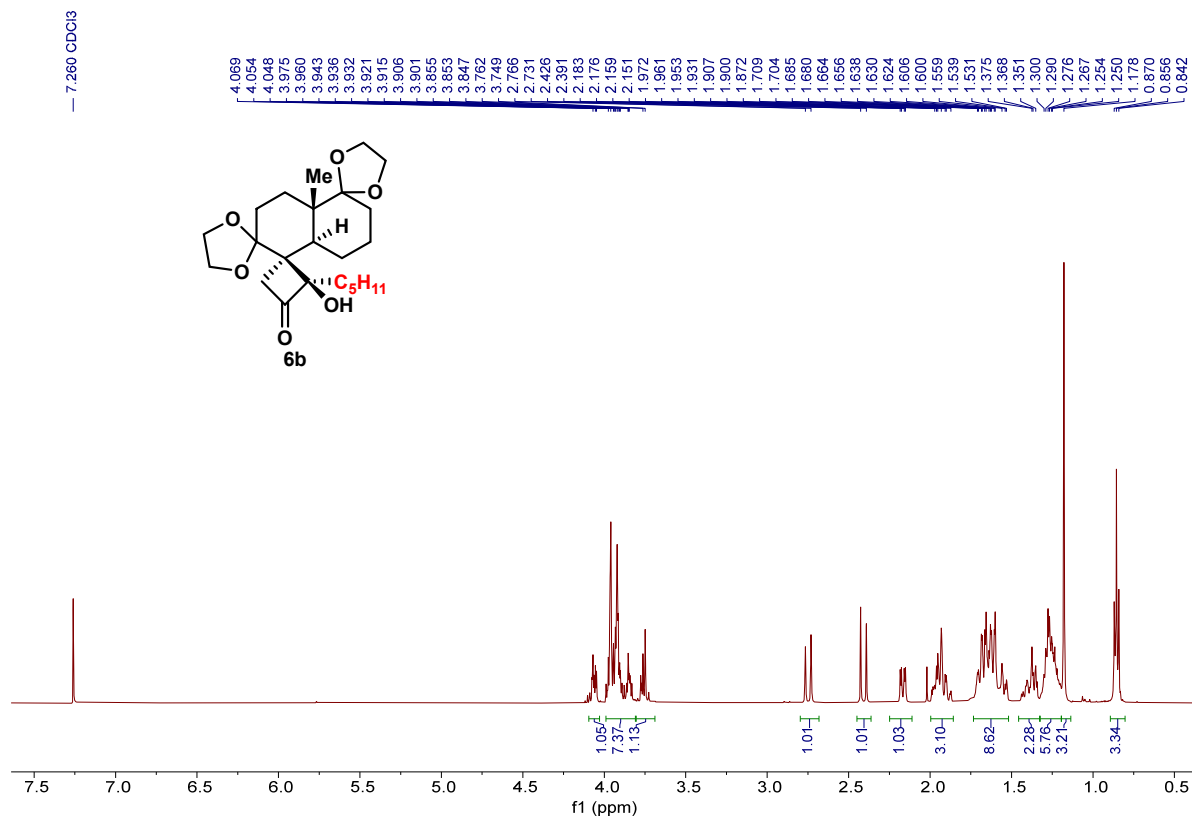

Figure S41. <sup>1</sup>H NMR Spectra of Compound **6b** (CDCl<sub>3</sub>, 500 MHz)

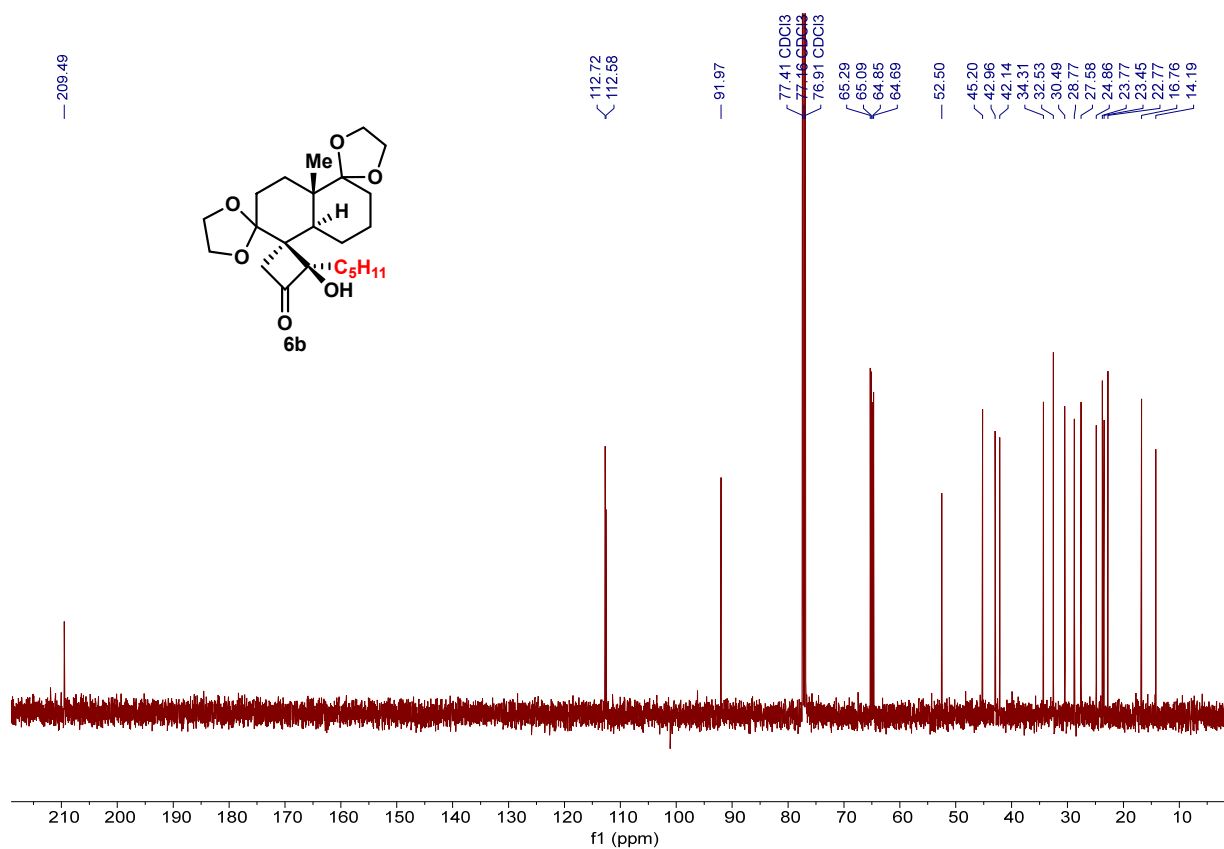

Figure S42. <sup>13</sup>C NMR Spectra of Compound **6b** (CDCl<sub>3</sub>, 125 MHz)

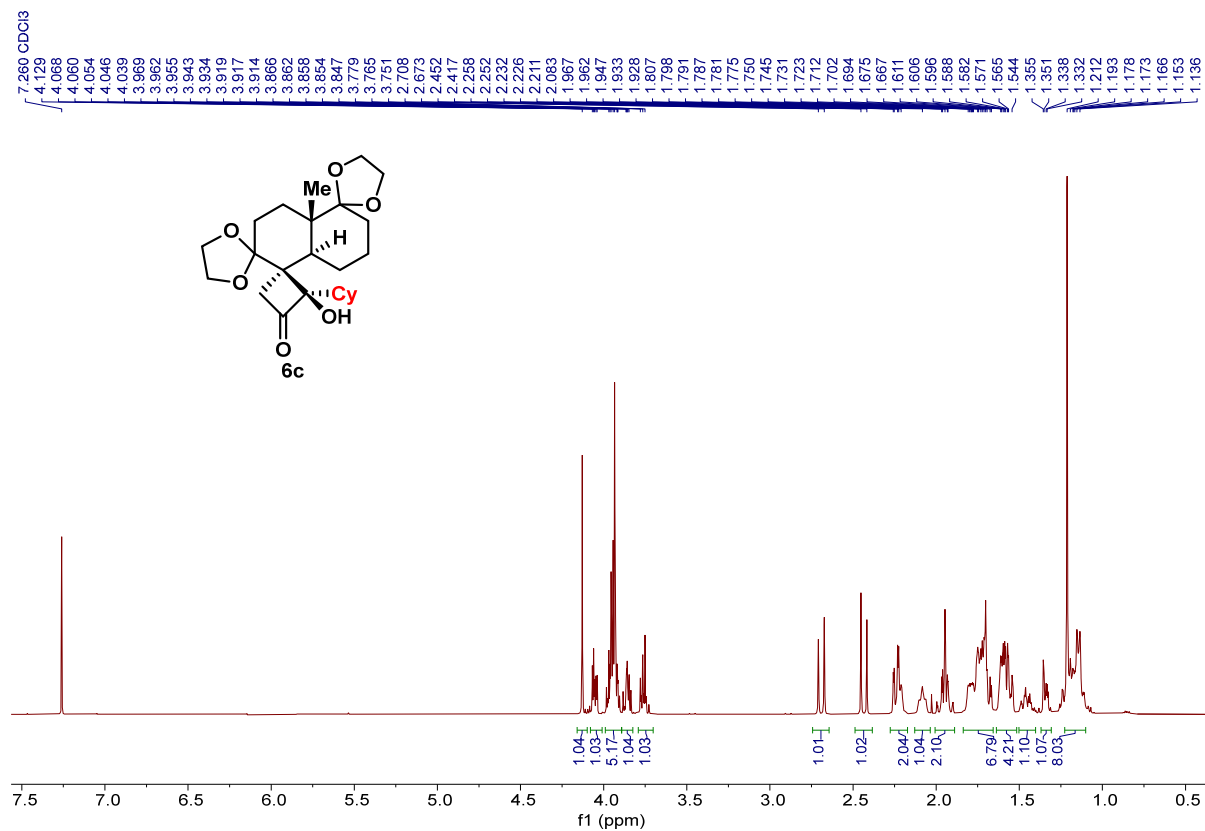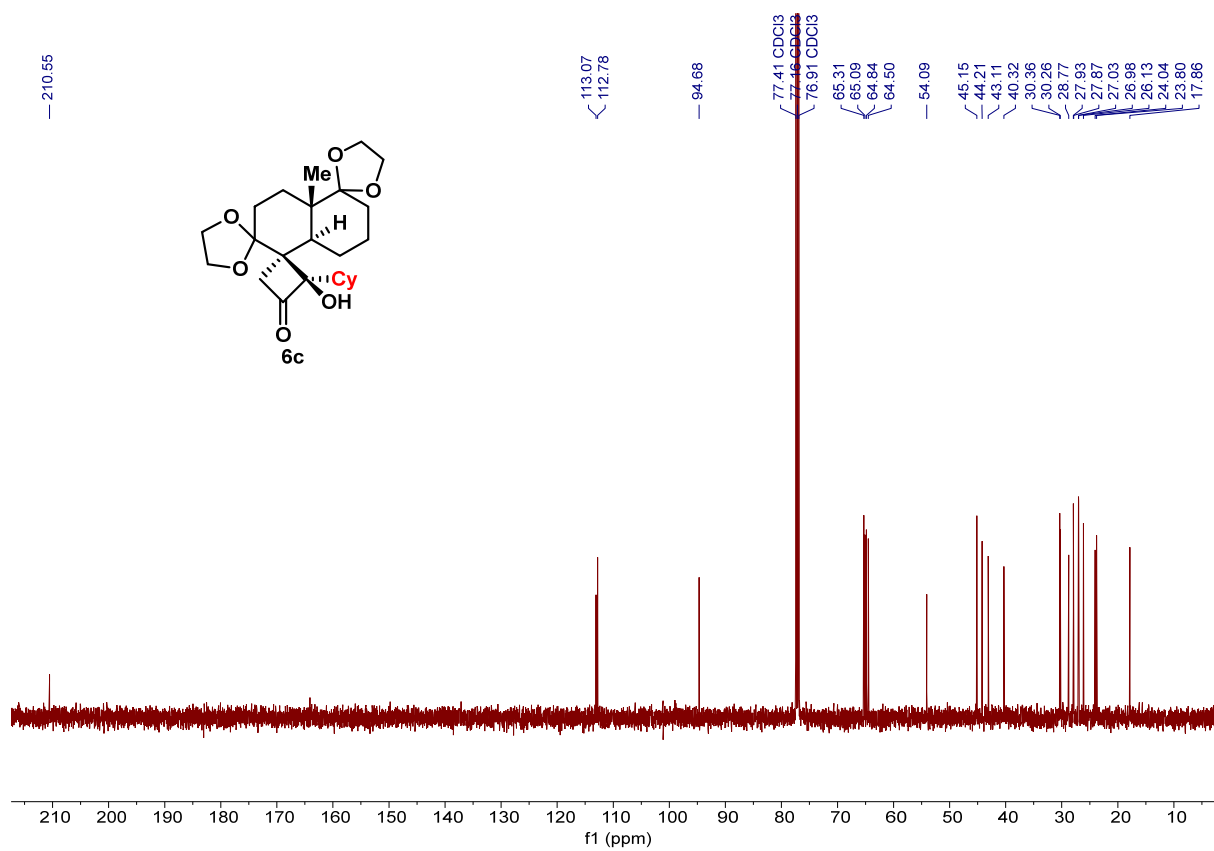



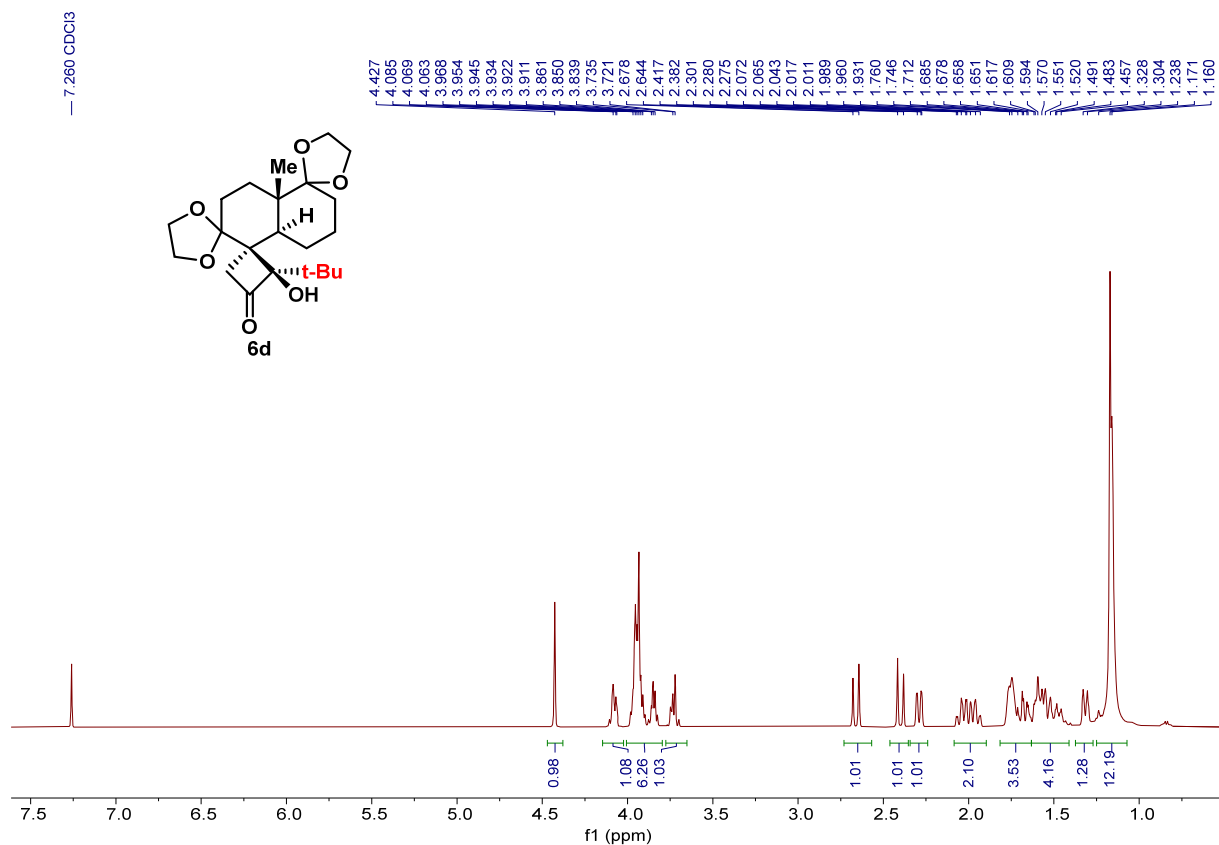

**Figure S45.** <sup>1</sup>H NMR Spectra of Compound **6d** (CDCl<sub>3</sub>, 500 MHz)

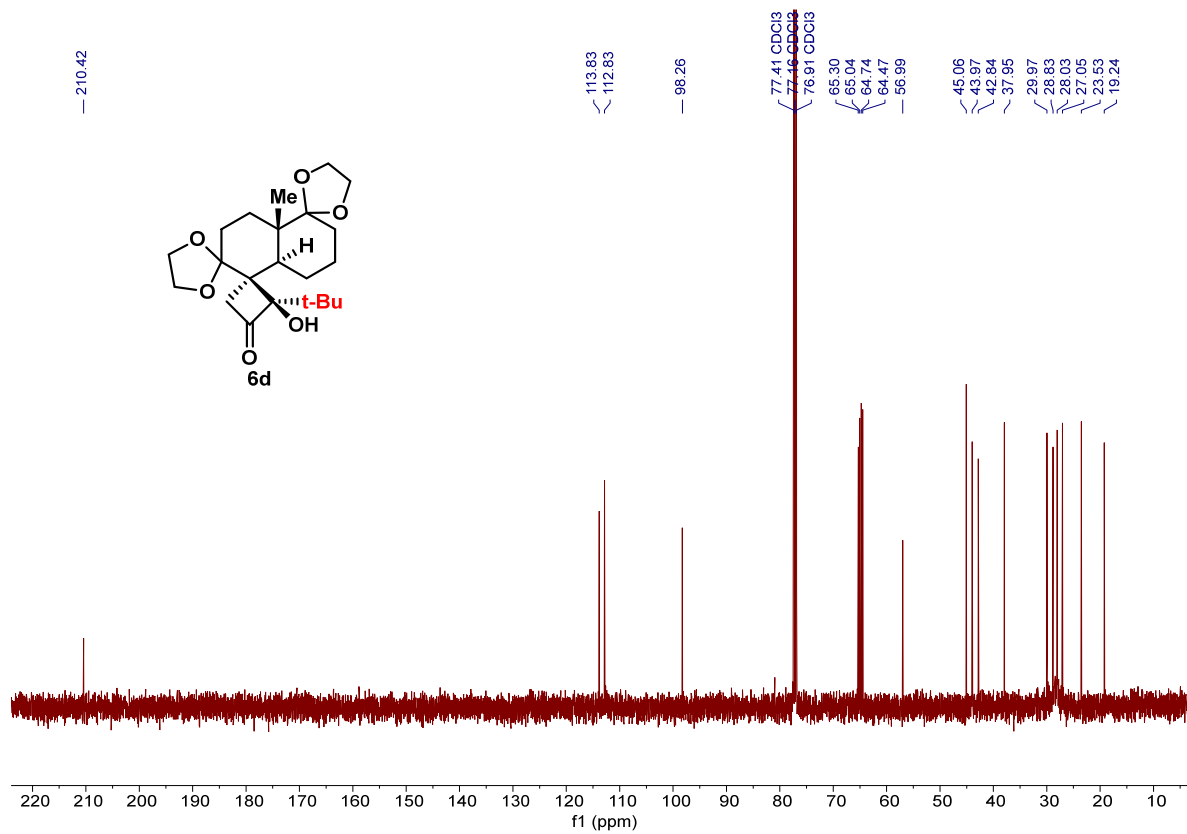

**Figure S46.** <sup>13</sup>C NMR Spectra of Compound **6d** (CDCl<sub>3</sub>, 125 MHz)

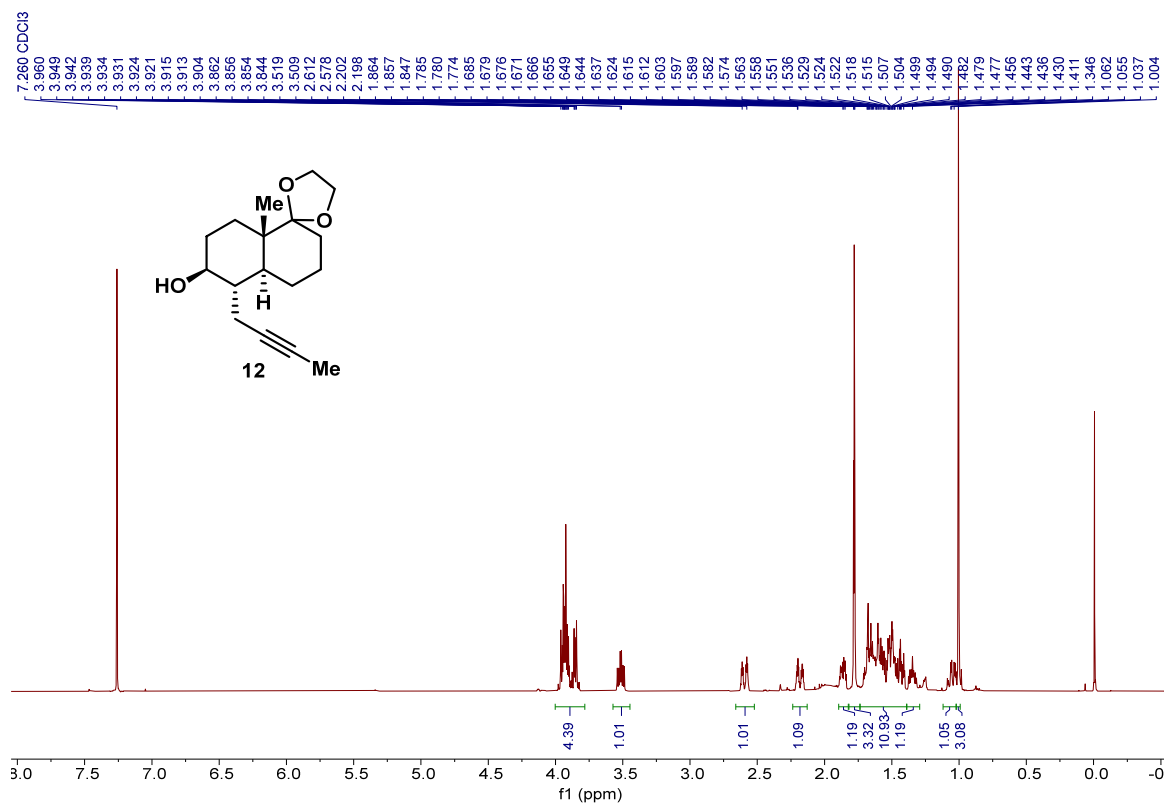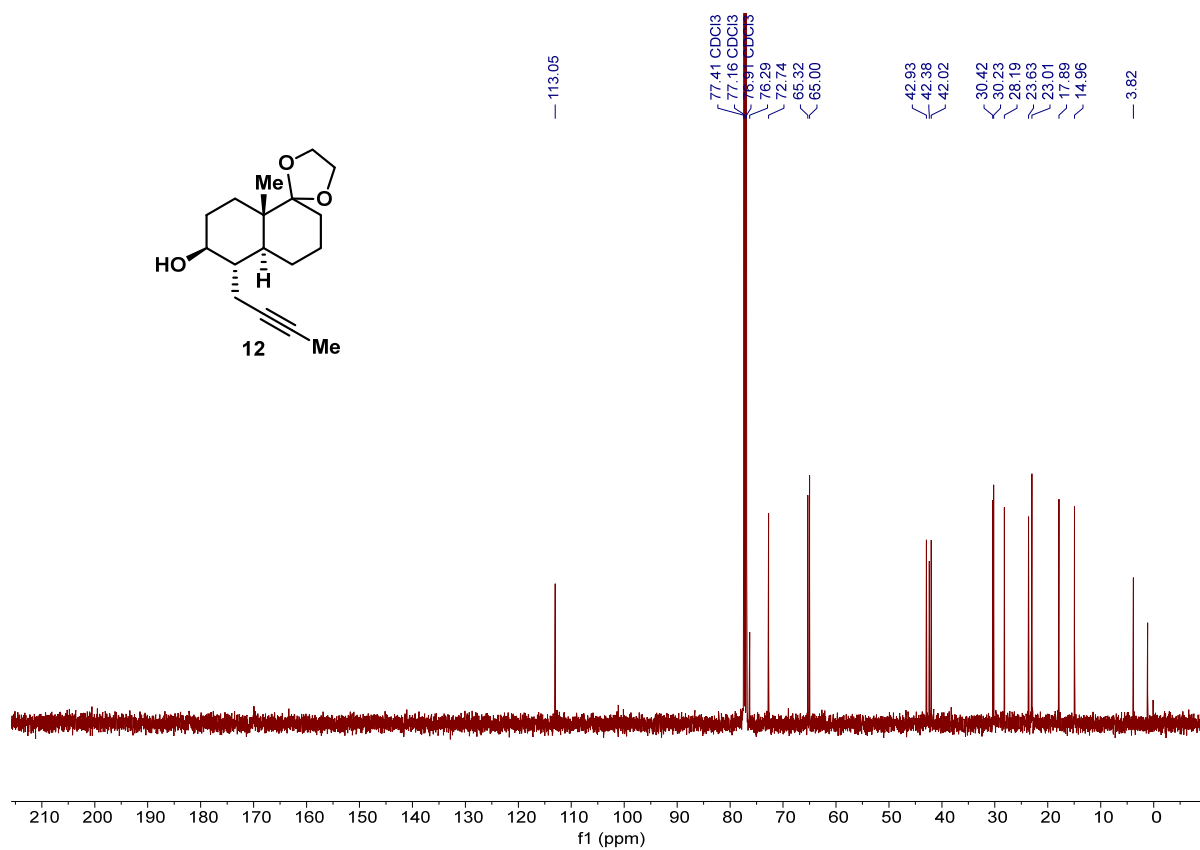

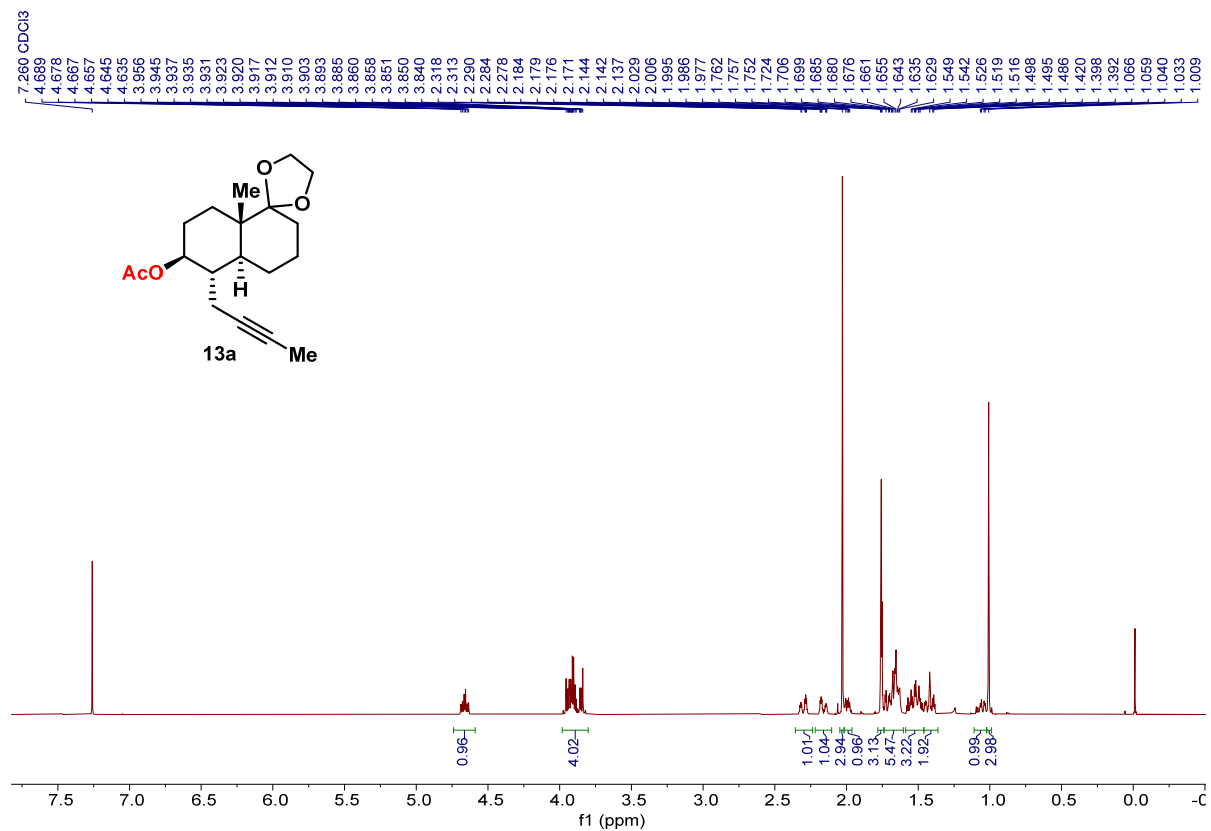

Figure S49.  $^1\text{H}$  NMR Spectra of Compound **13a** ( $\text{CDCl}_3$ , 500 MHz)

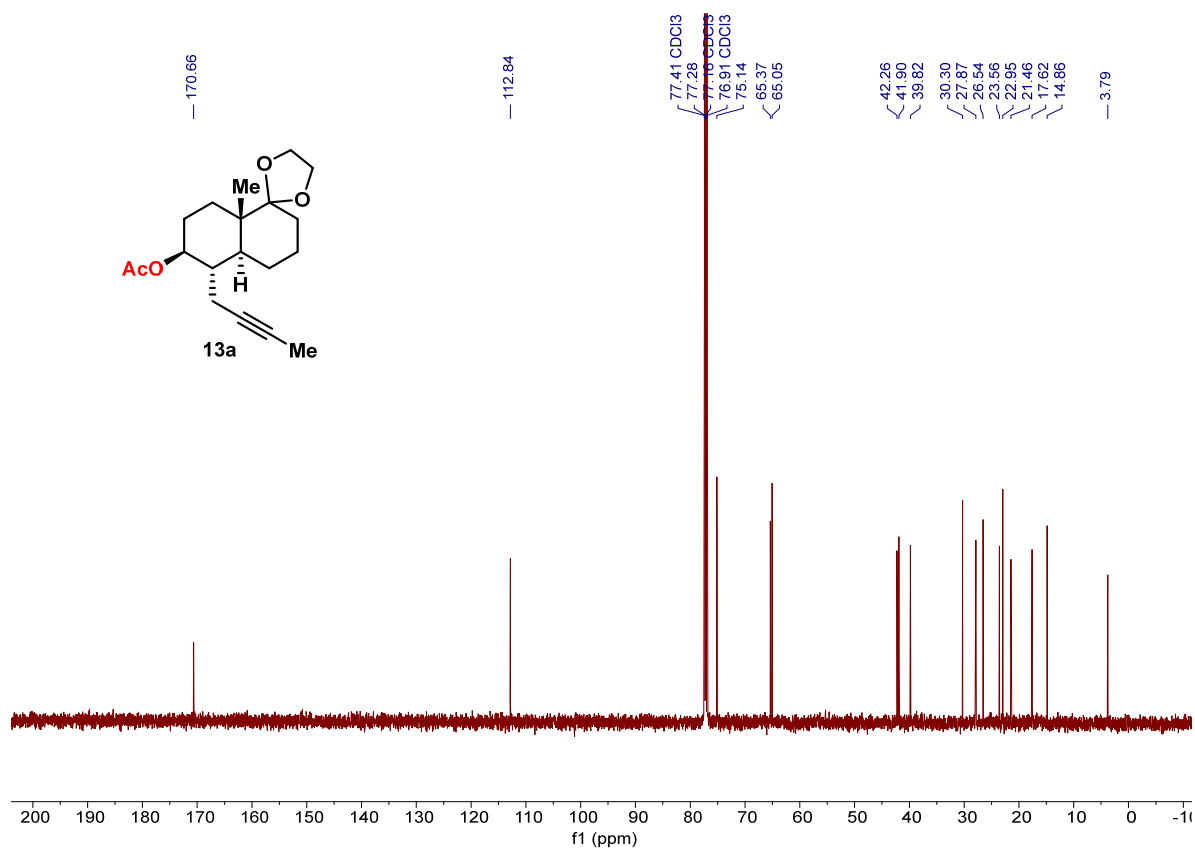

Figure S50.  $^{13}\text{C}$  NMR Spectra of Compound **13a** ( $\text{CDCl}_3$ , 125 MHz)

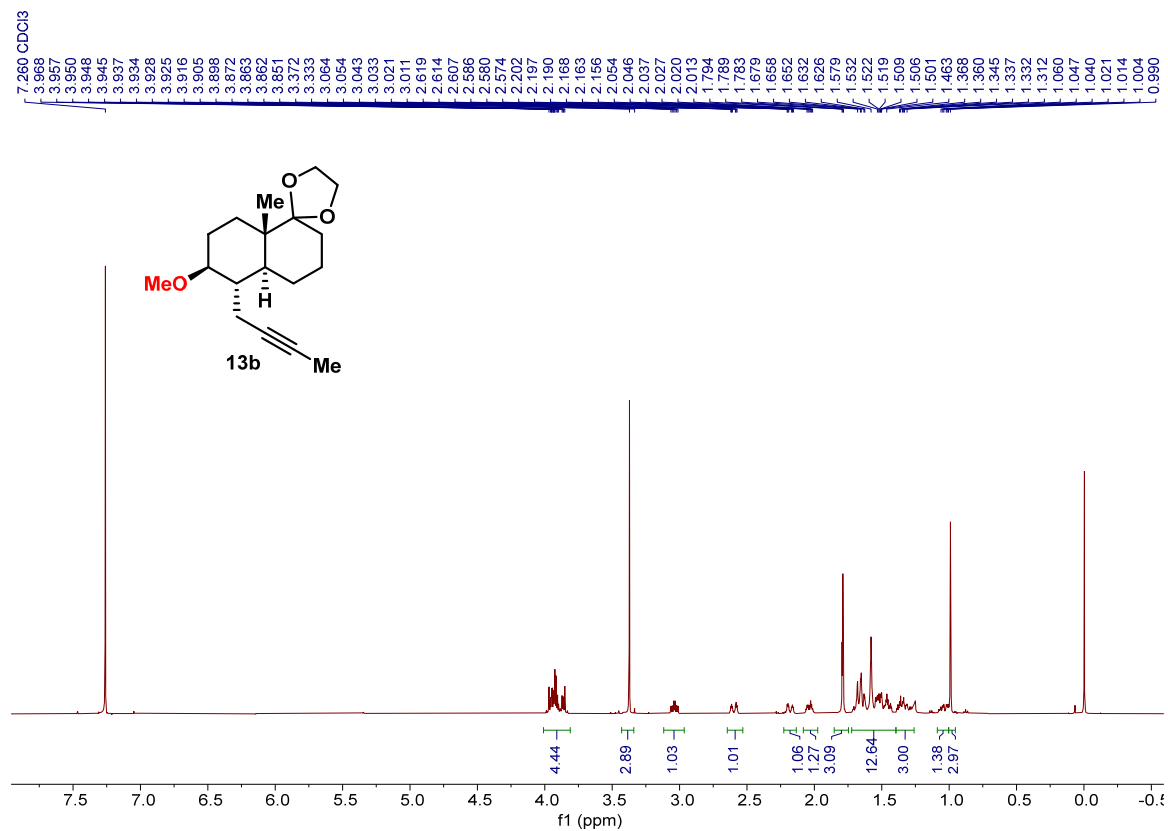

Figure S51.  $^1\text{H}$  NMR Spectra of Compound **13b** ( $\text{CDCl}_3$ , 500 MHz)

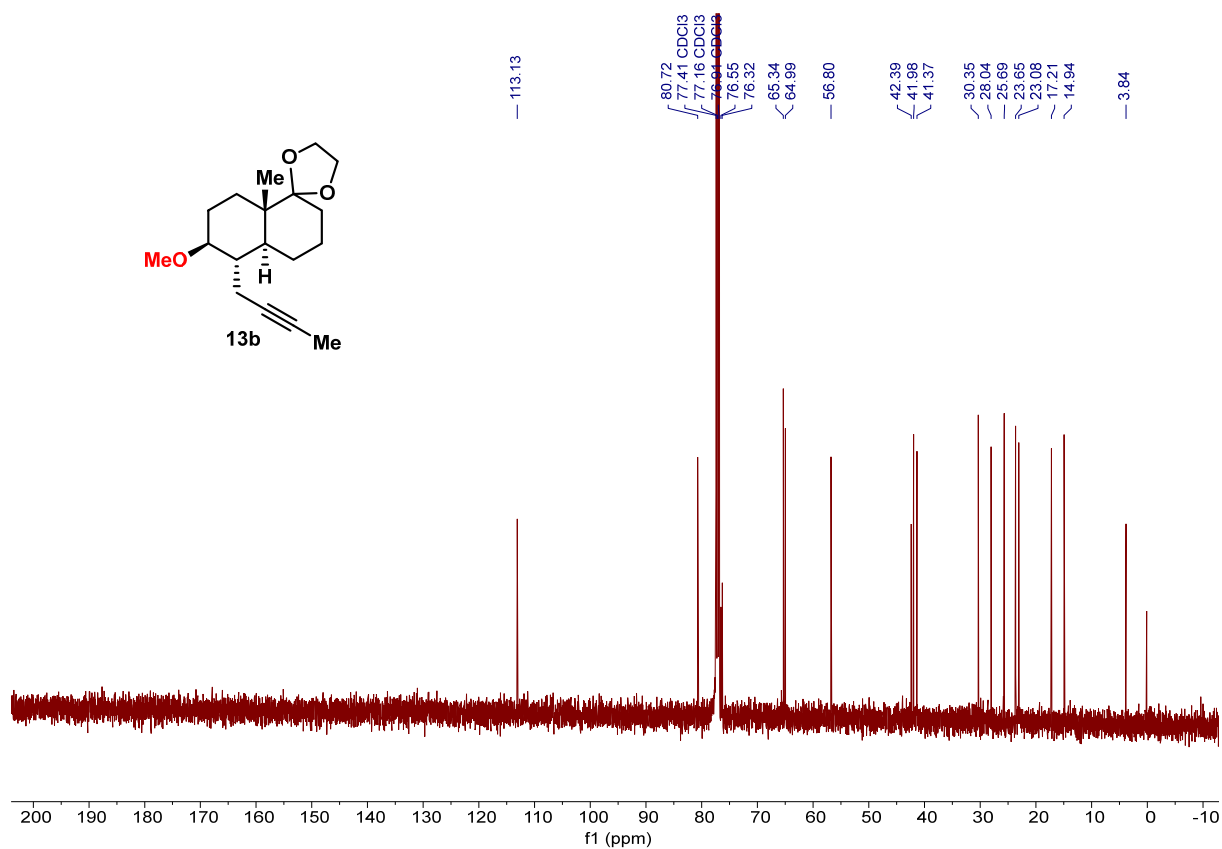

Figure S52.  $^{13}\text{C}$  NMR Spectra of Compound **13b** ( $\text{CDCl}_3$ , 125 MHz)

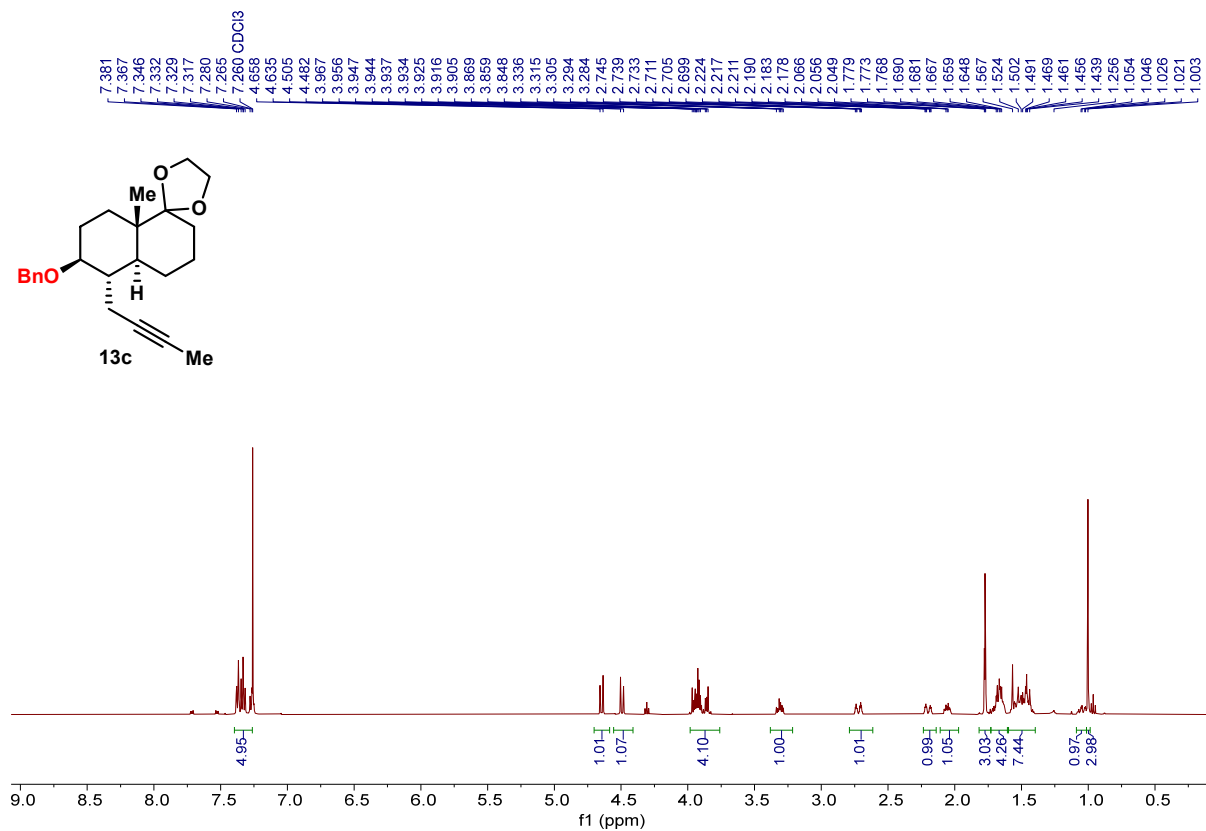

**Figure S53. <sup>1</sup>H NMR Spectra of Compound 13c (CDCl<sub>3</sub>, 500 MHz)**

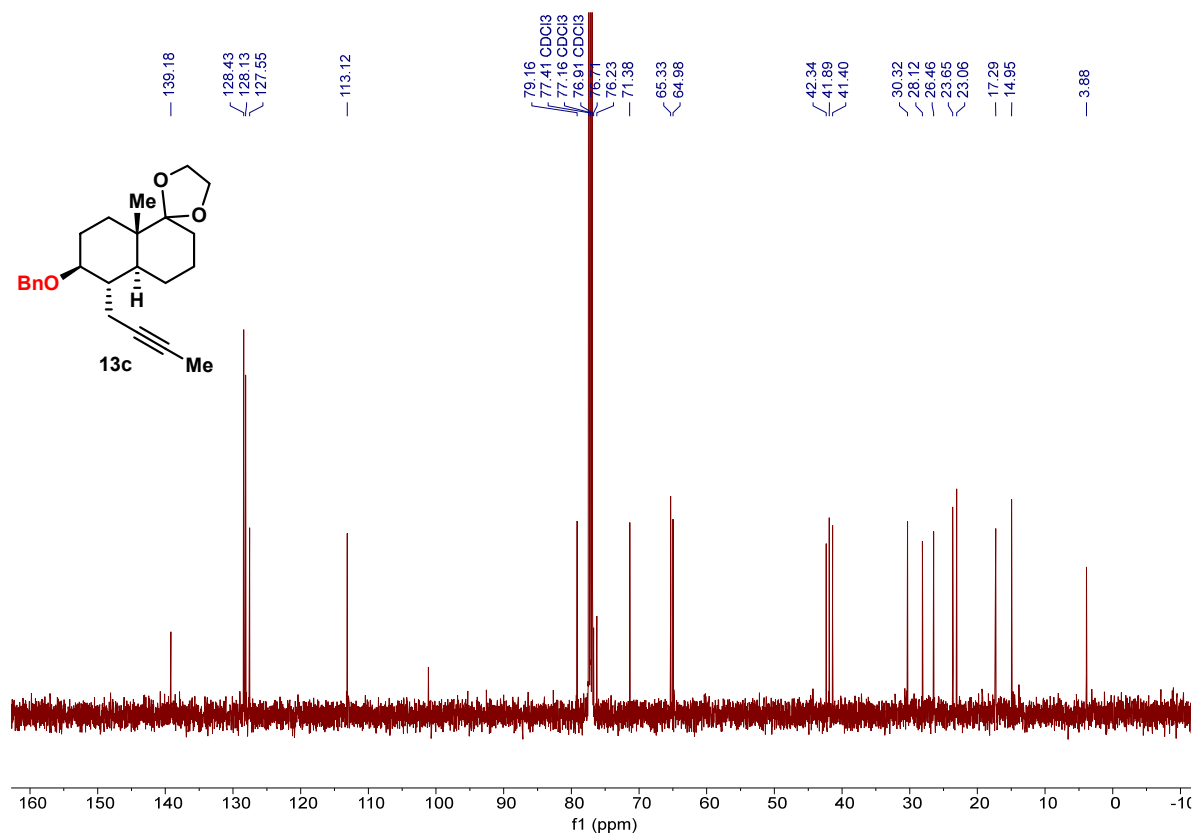

**Figure S54. <sup>13</sup>C NMR Spectra of Compound 13c (CDCl<sub>3</sub>, 125 MHz)**

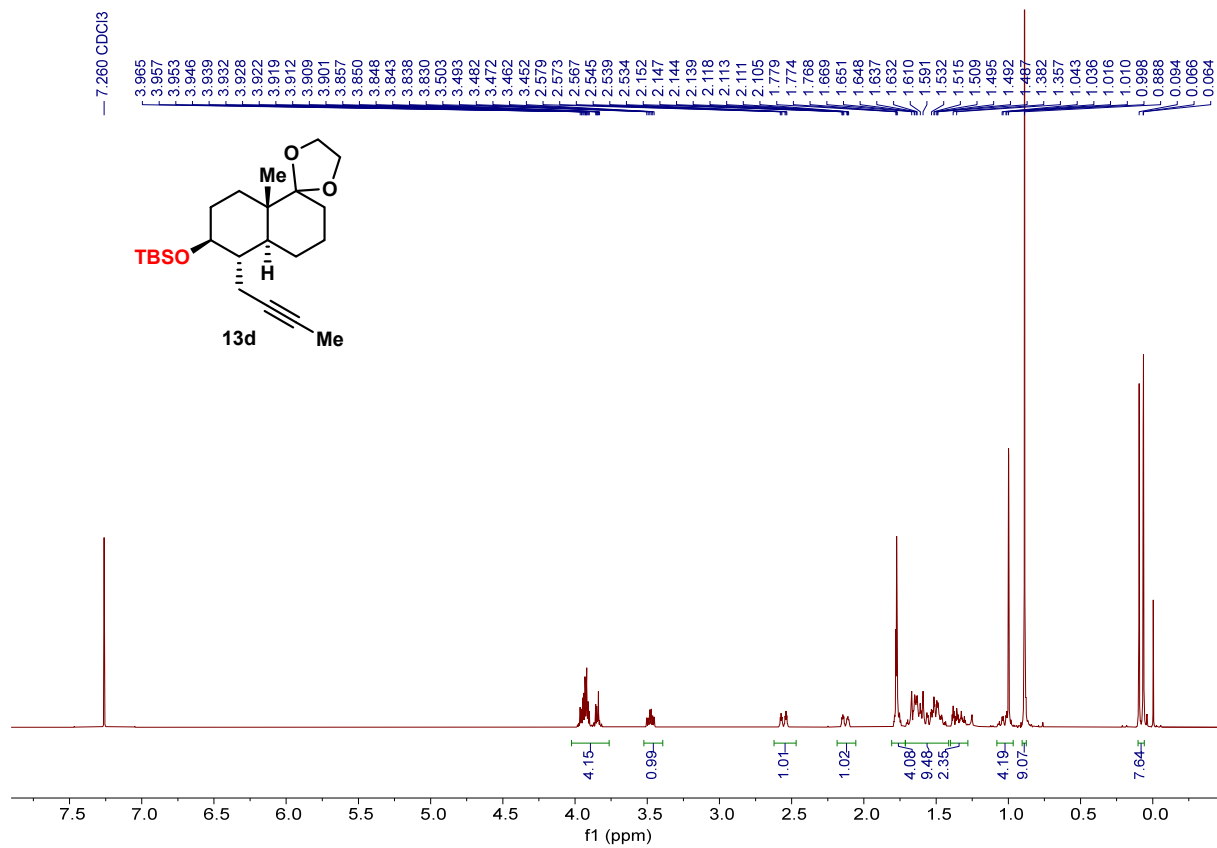

**Figure S55.**  $^1\text{H}$  NMR Spectra of Compound **13d** ( $\text{CDCl}_3$ , 500 MHz)

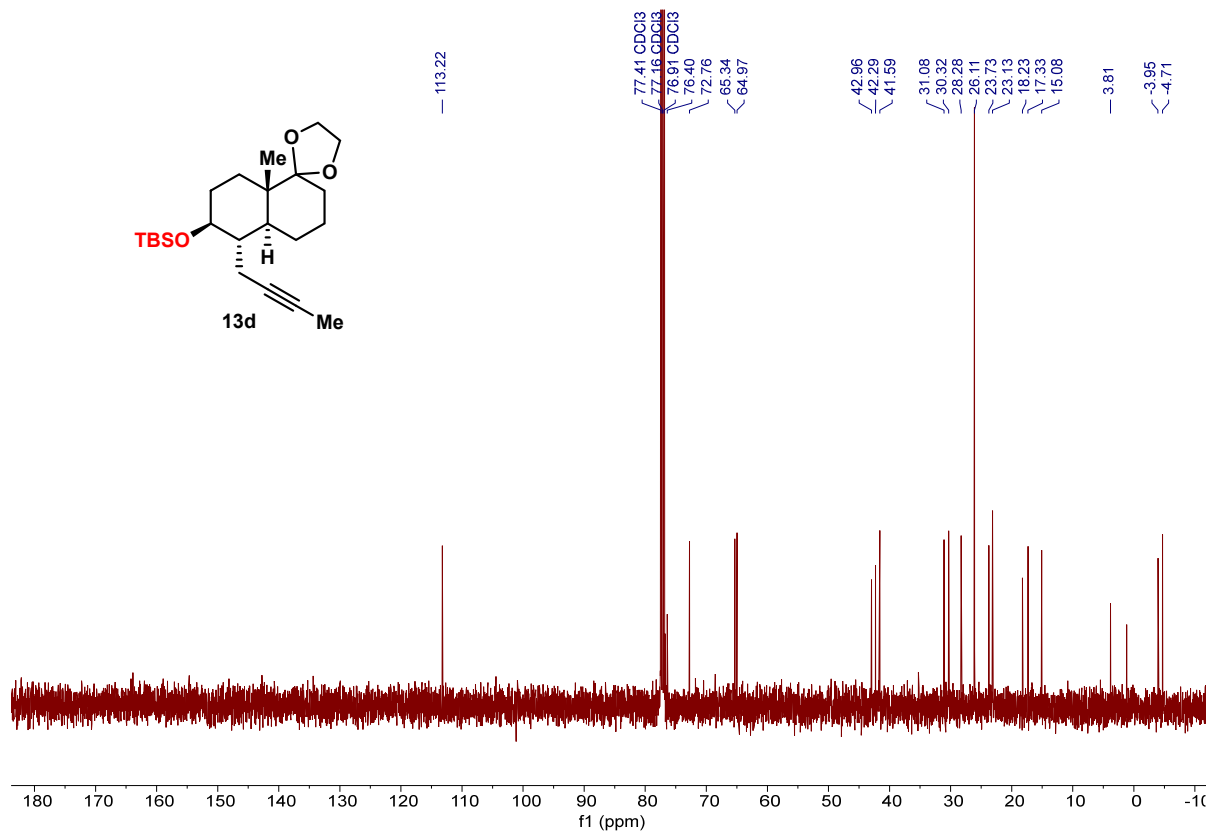

**Figure S56.**  $^{13}\text{C}$  NMR Spectra of Compound **13d** ( $\text{CDCl}_3$ , 125 MHz)

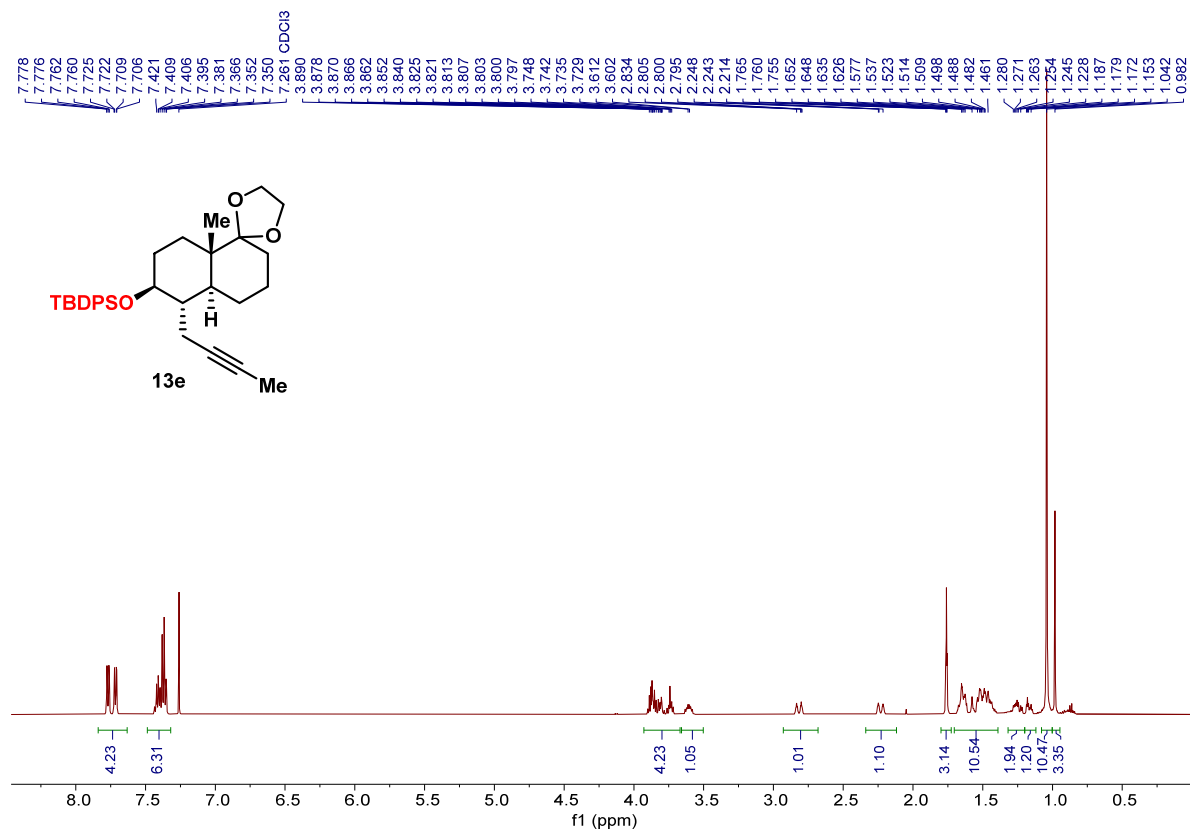

**Figure S57.** <sup>1</sup>H NMR Spectra of Compound **13e** (CDCl<sub>3</sub>, 500 MHz)

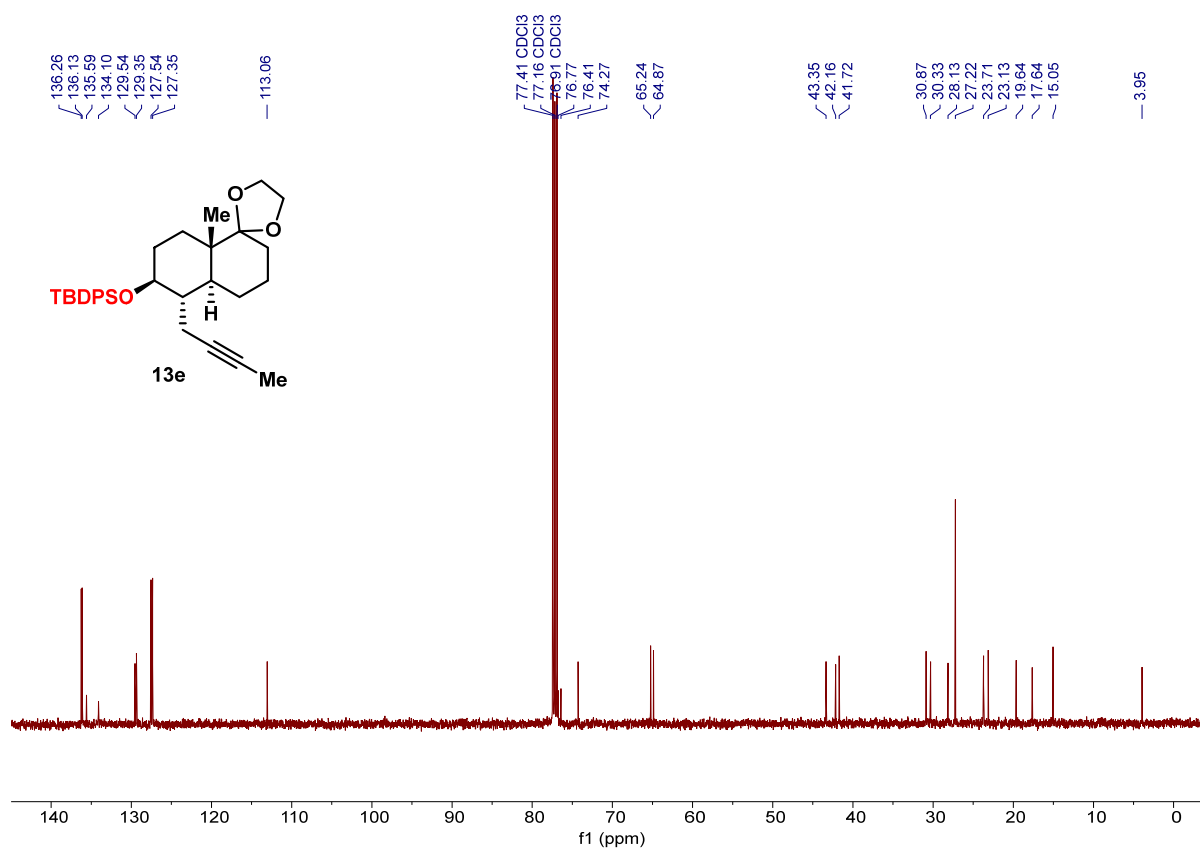

**Figure S58.** <sup>13</sup>C NMR Spectra of Compound **13e** (CDCl<sub>3</sub>, 125 MHz)

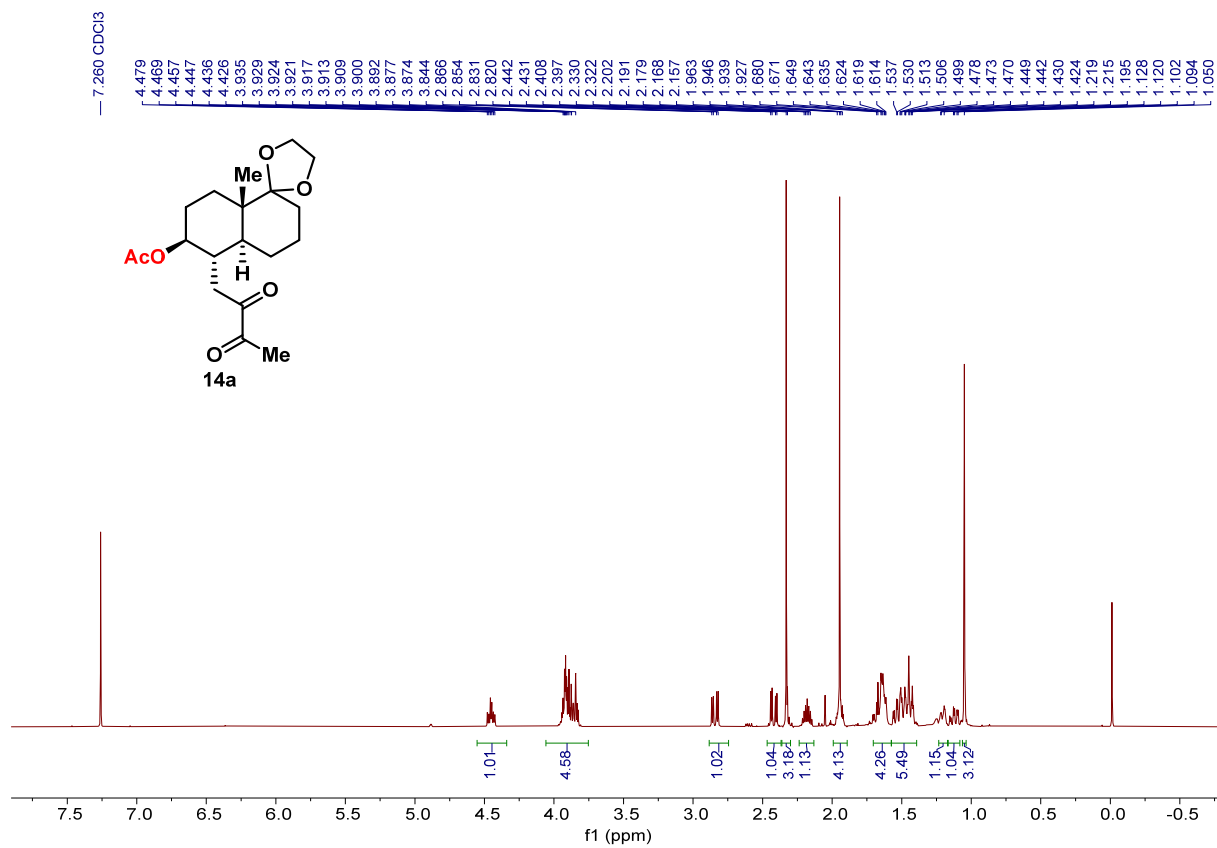

Figure S59. <sup>1</sup>H NMR Spectra of Compound **14a** (CDCl<sub>3</sub>, 500 MHz)

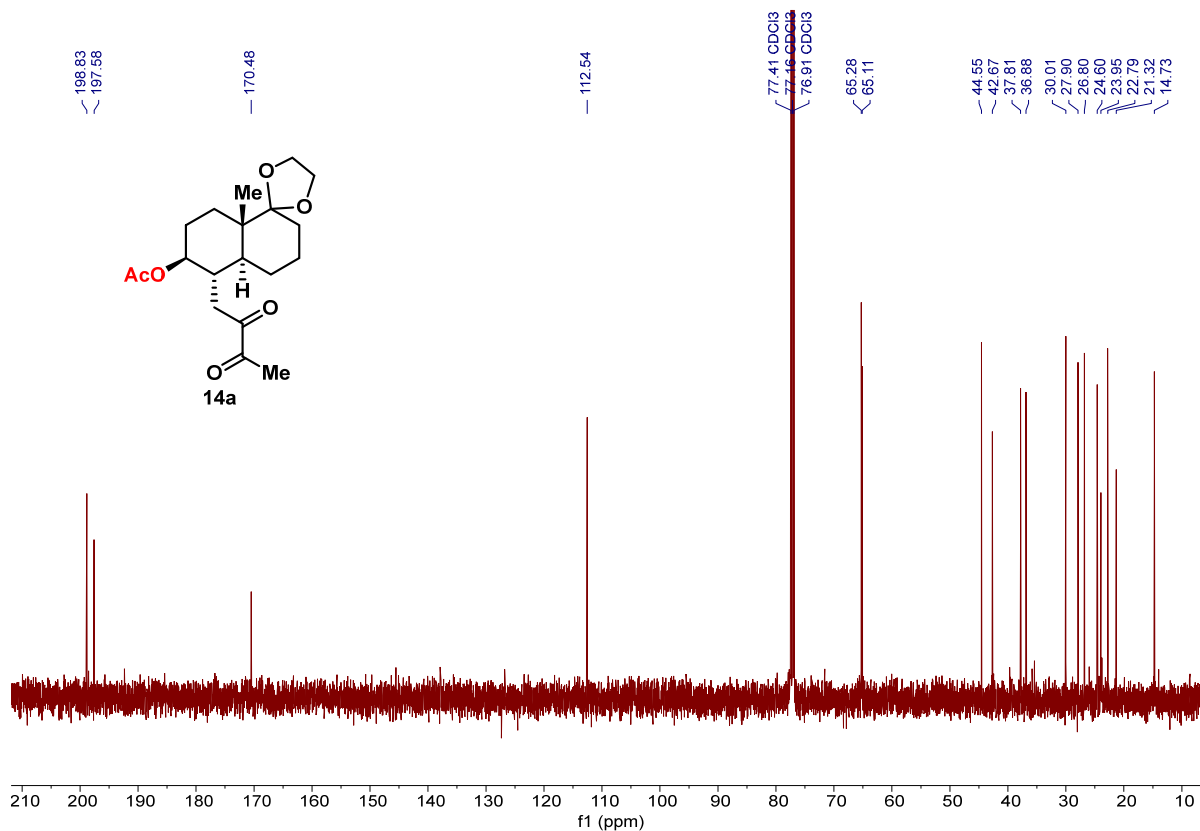

Figure S60. <sup>13</sup>C NMR Spectra of Compound **14a** (CDCl<sub>3</sub>, 125 MHz)



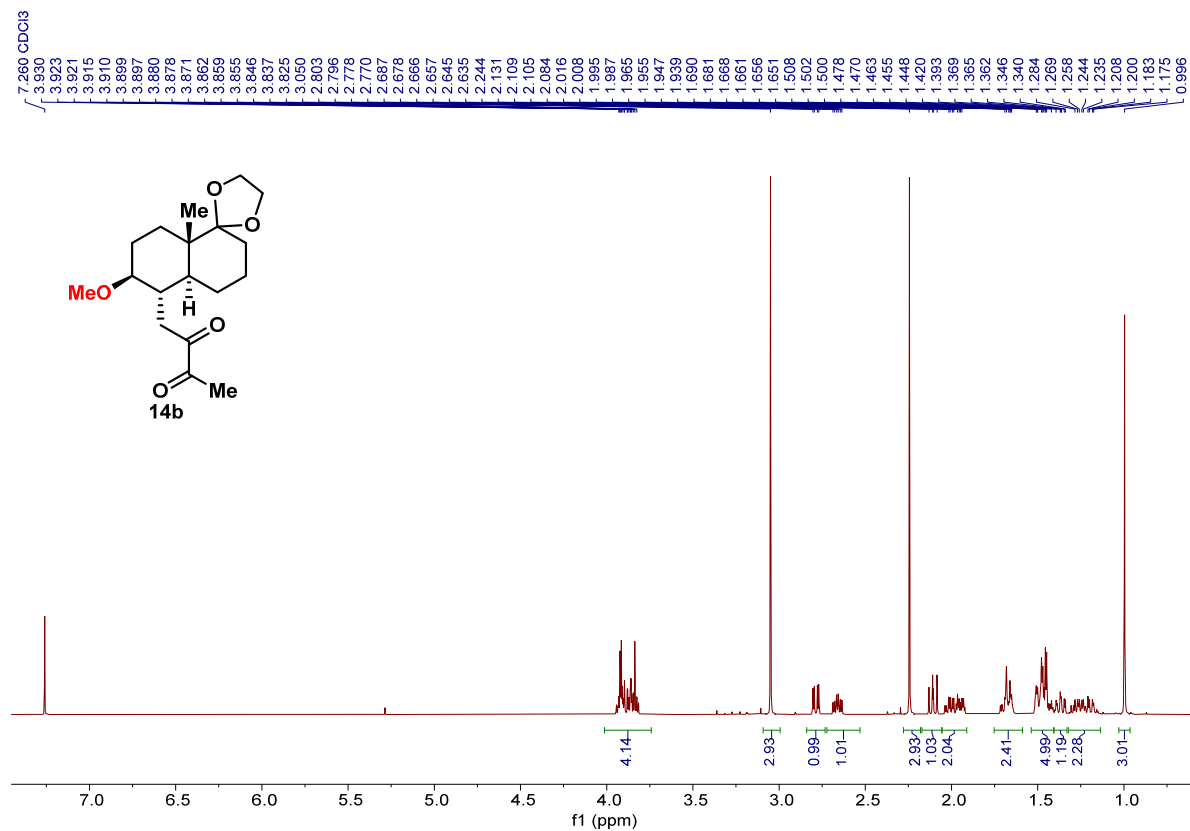

Figure S61.  $^1\text{H}$  NMR Spectra of Compound **14b** ( $\text{CDCl}_3$ , 500 MHz)

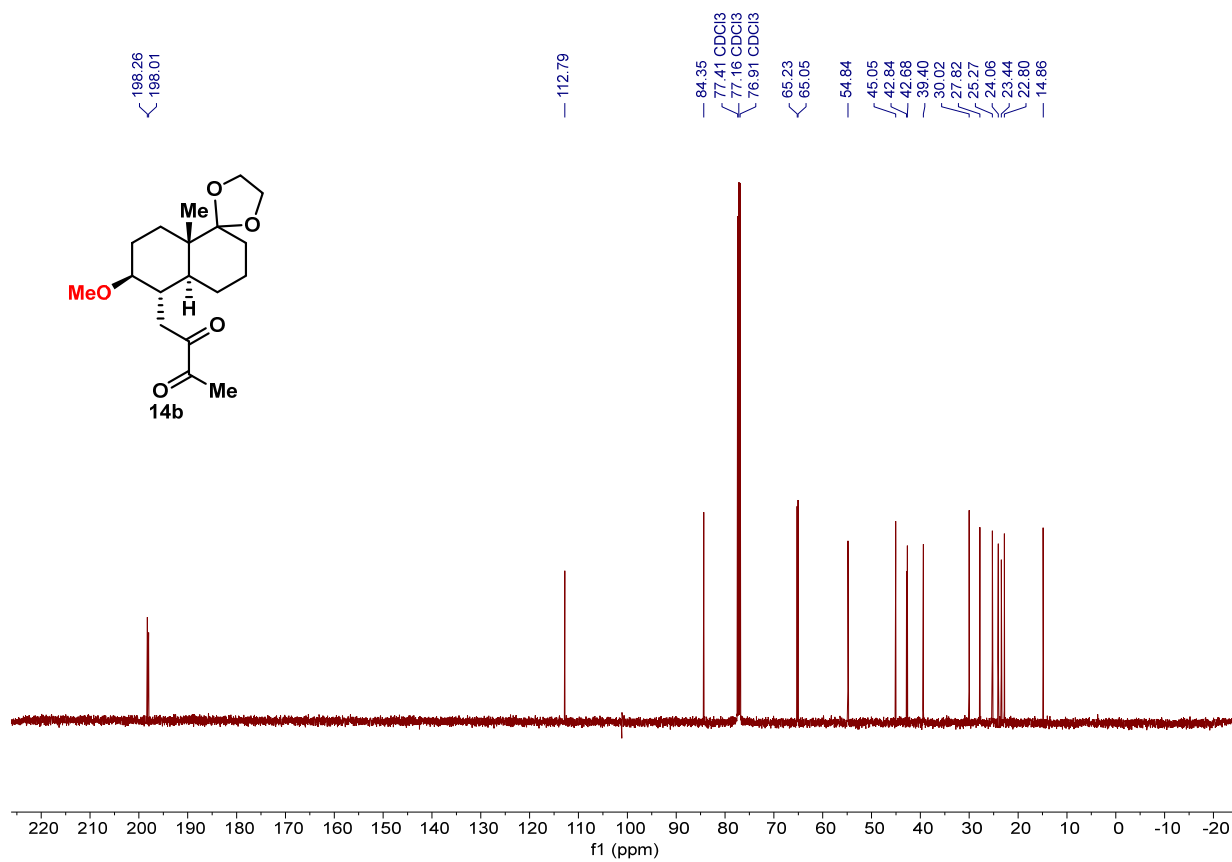

Figure S62.  $^{13}\text{C}$  NMR Spectra of Compound **14b** ( $\text{CDCl}_3$ , 125 MHz)

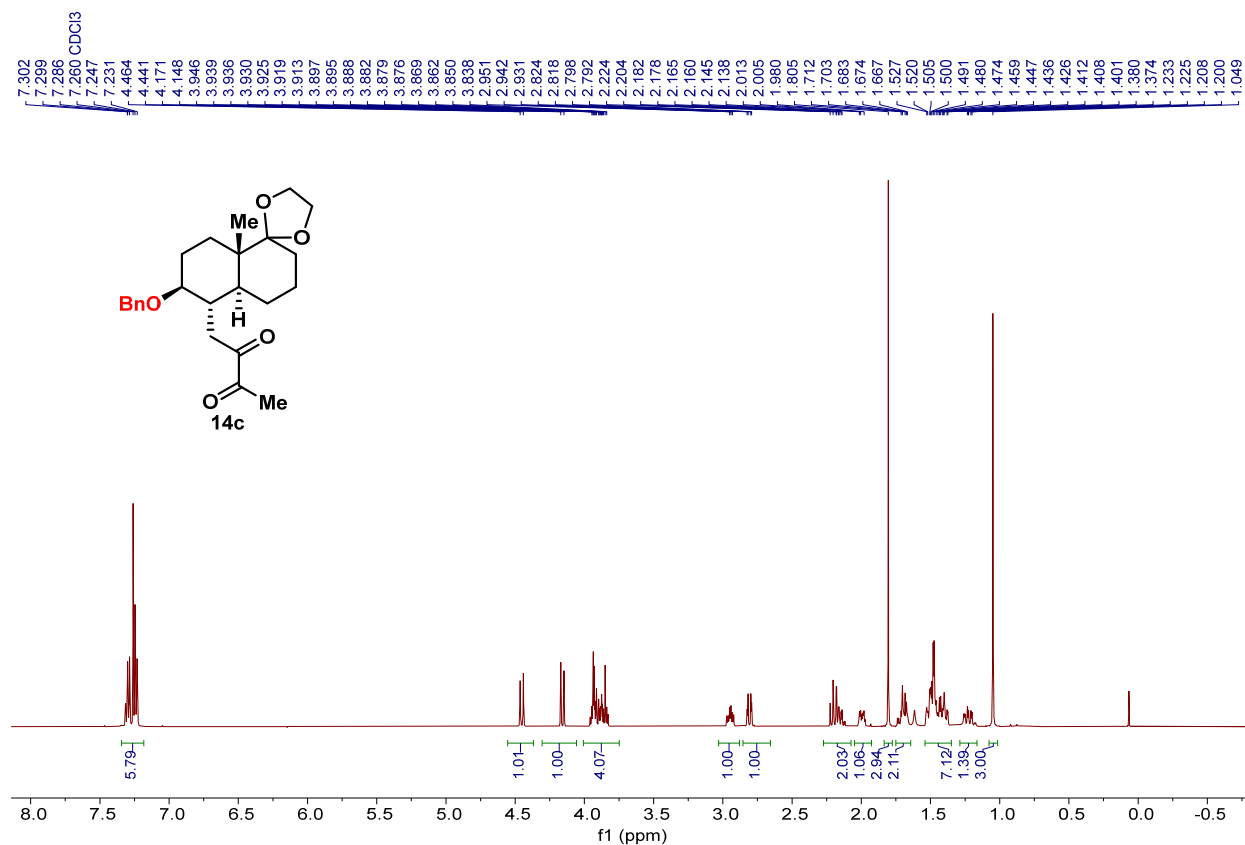

Figure S63. <sup>1</sup>H NMR Spectra of Compound 14c (CDCl<sub>3</sub>, 500 MHz)

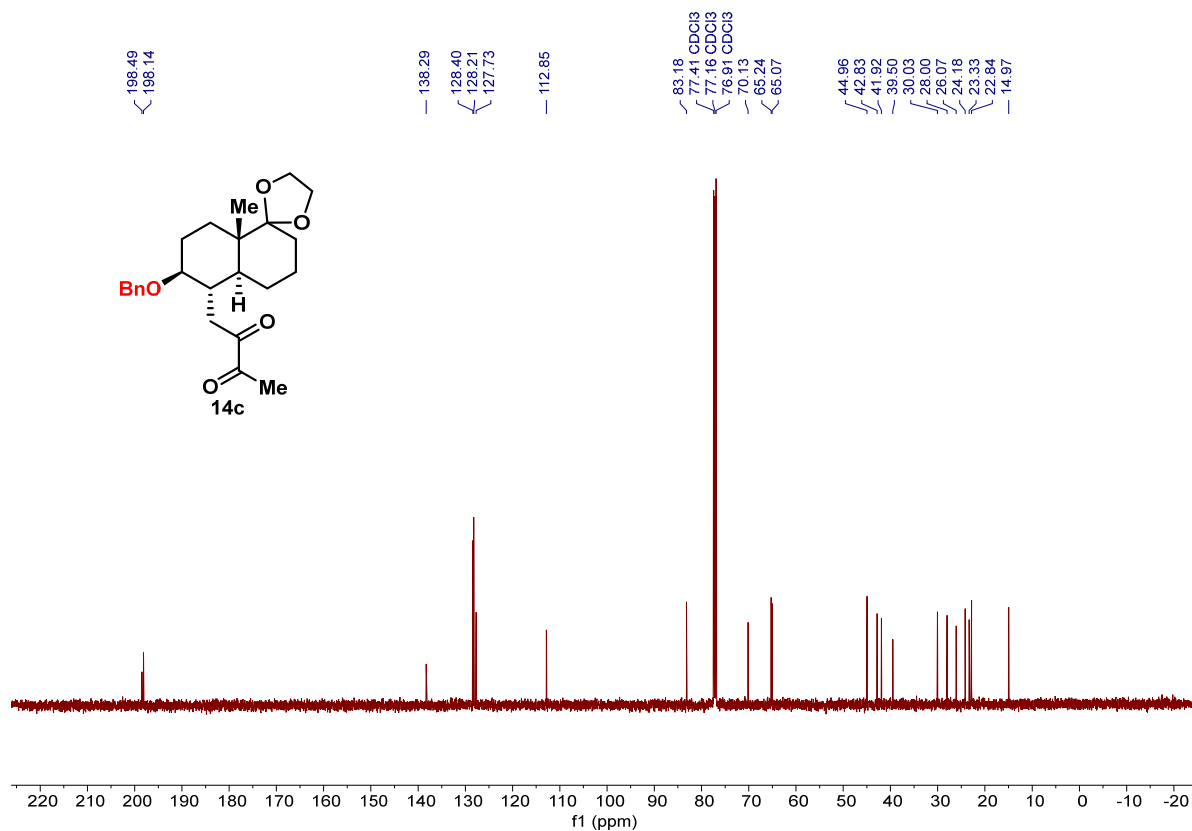

Figure S64. <sup>13</sup>C NMR Spectra of Compound 14c (CDCl<sub>3</sub>, 125 MHz)

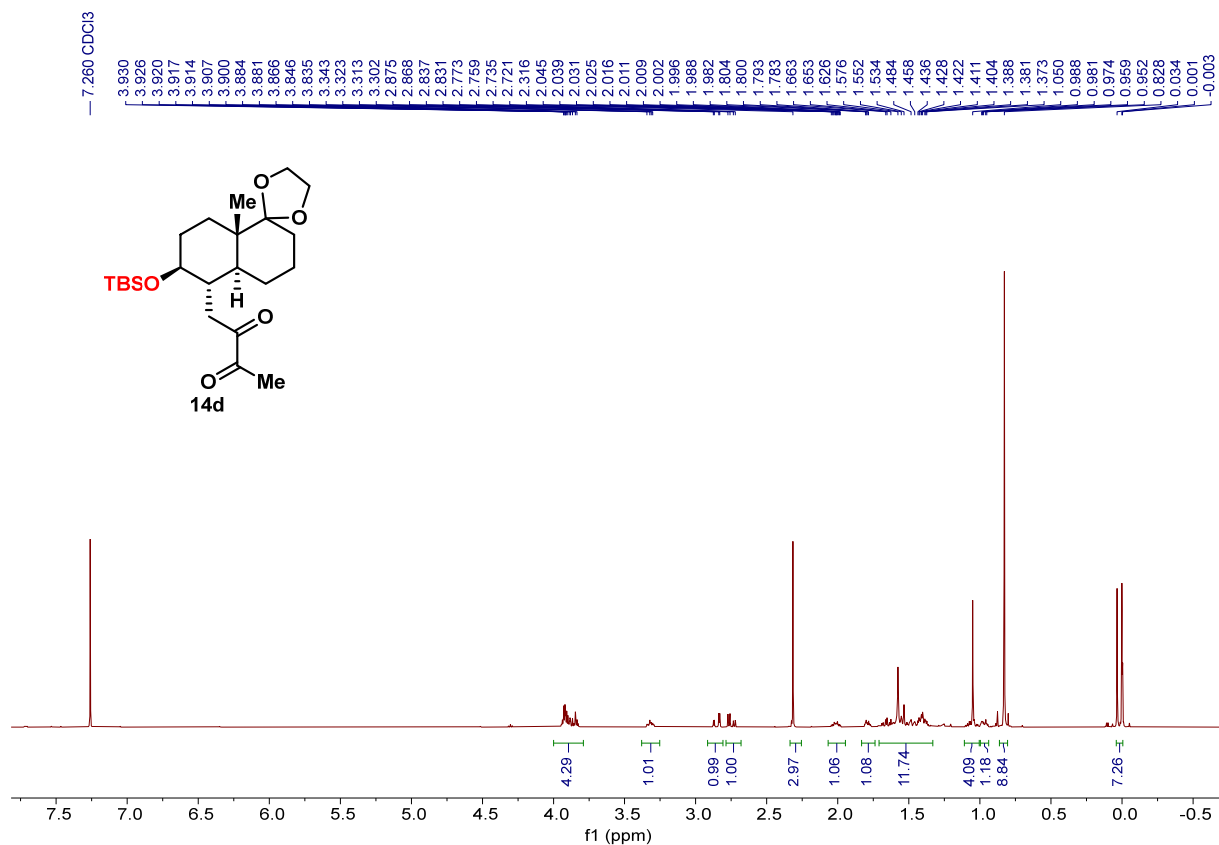

**Figure S65.** <sup>1</sup>H NMR Spectra of Compound **14d** (CDCl<sub>3</sub>, 500 MHz)

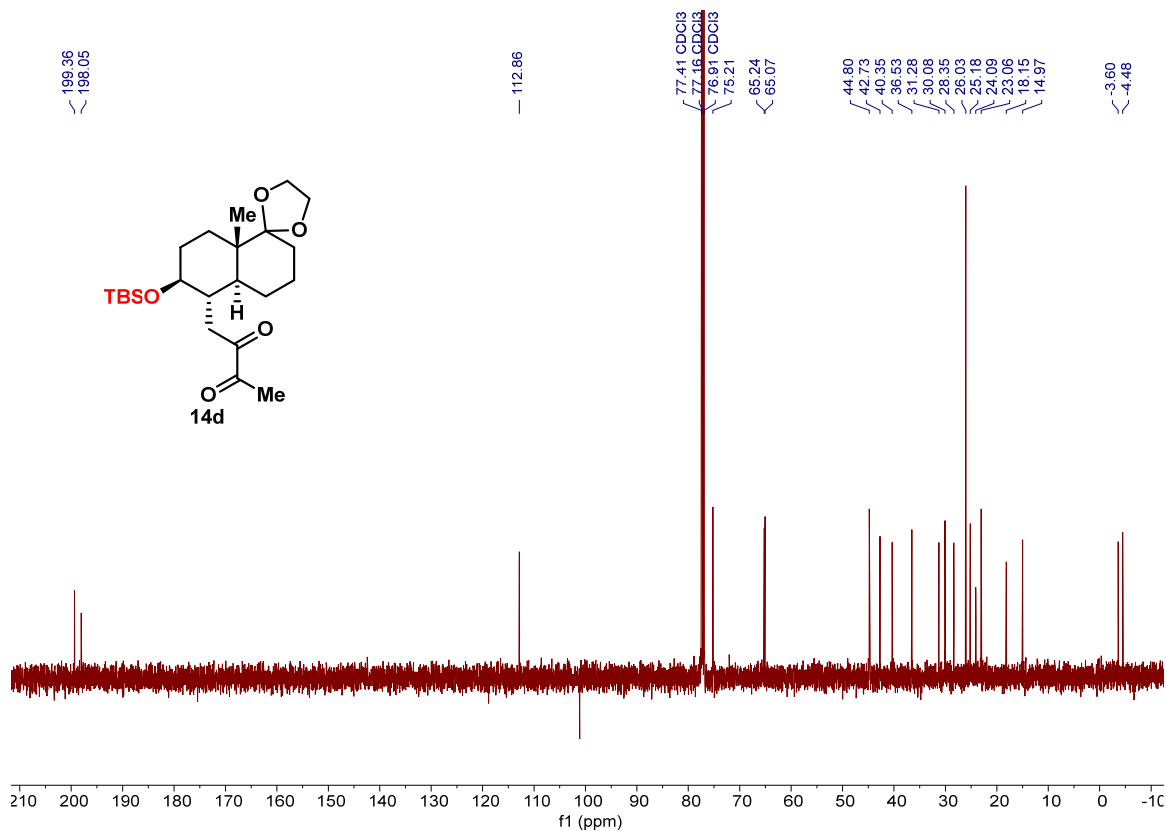

**Figure S66.** <sup>13</sup>C NMR Spectra of Compound **14d** (CDCl<sub>3</sub>, 125 MHz)

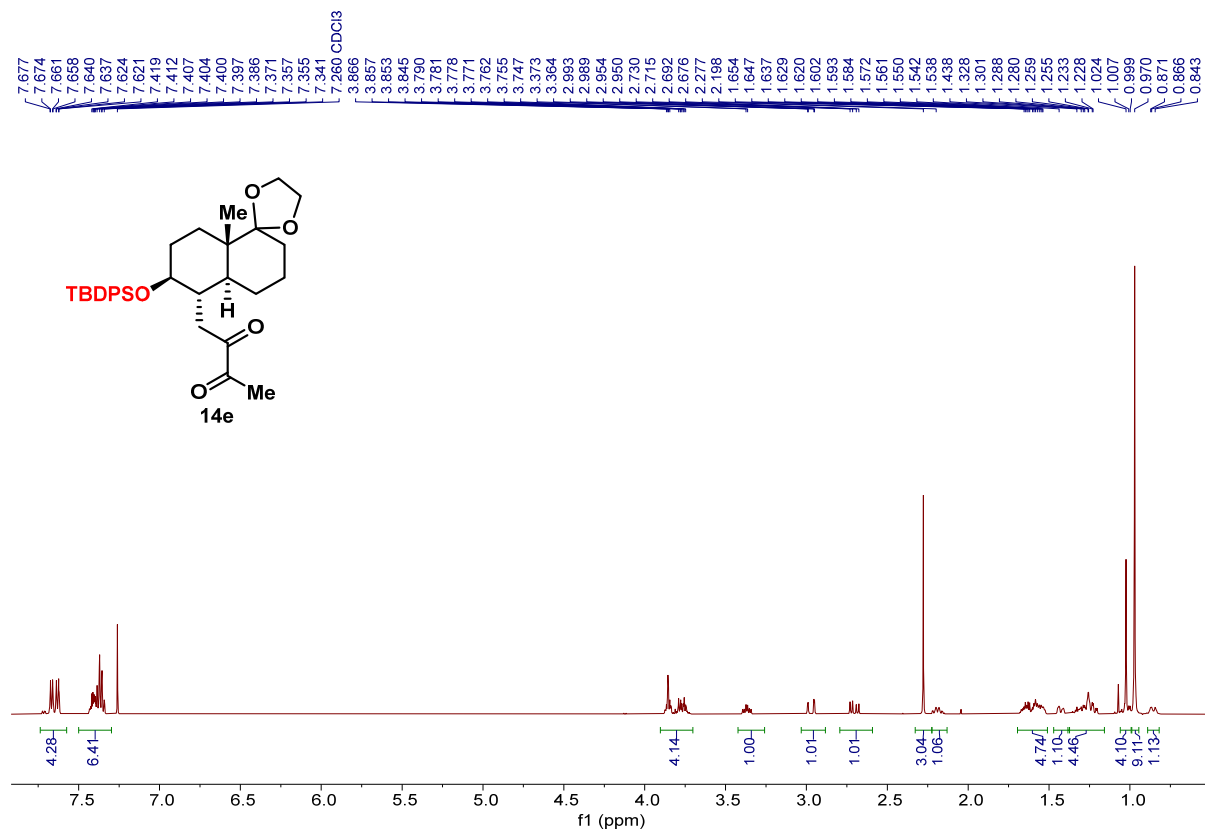

**Figure S67.** <sup>1</sup>H NMR Spectra of Compound **14e** (CDCl<sub>3</sub>, 500 MHz)

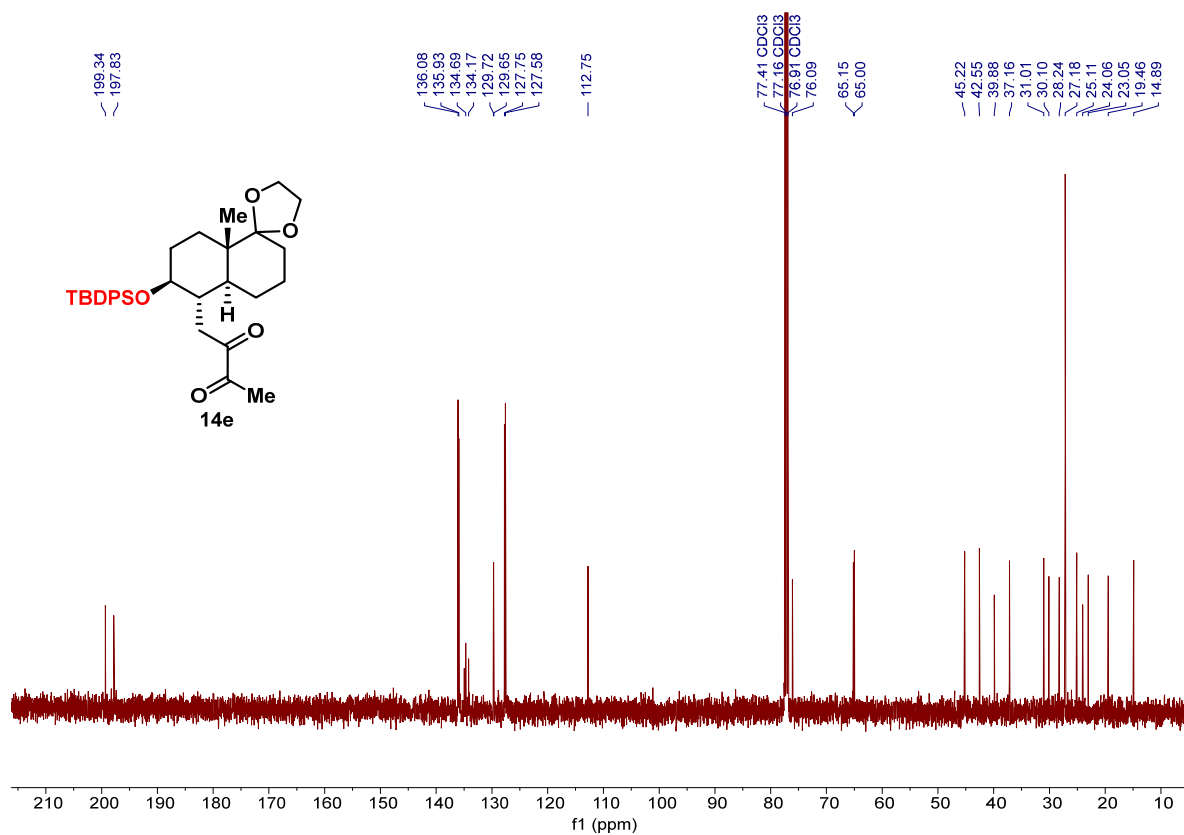

**Figure S68.** <sup>13</sup>C NMR Spectra of Compound **14e** (CDCl<sub>3</sub>, 125 MHz)

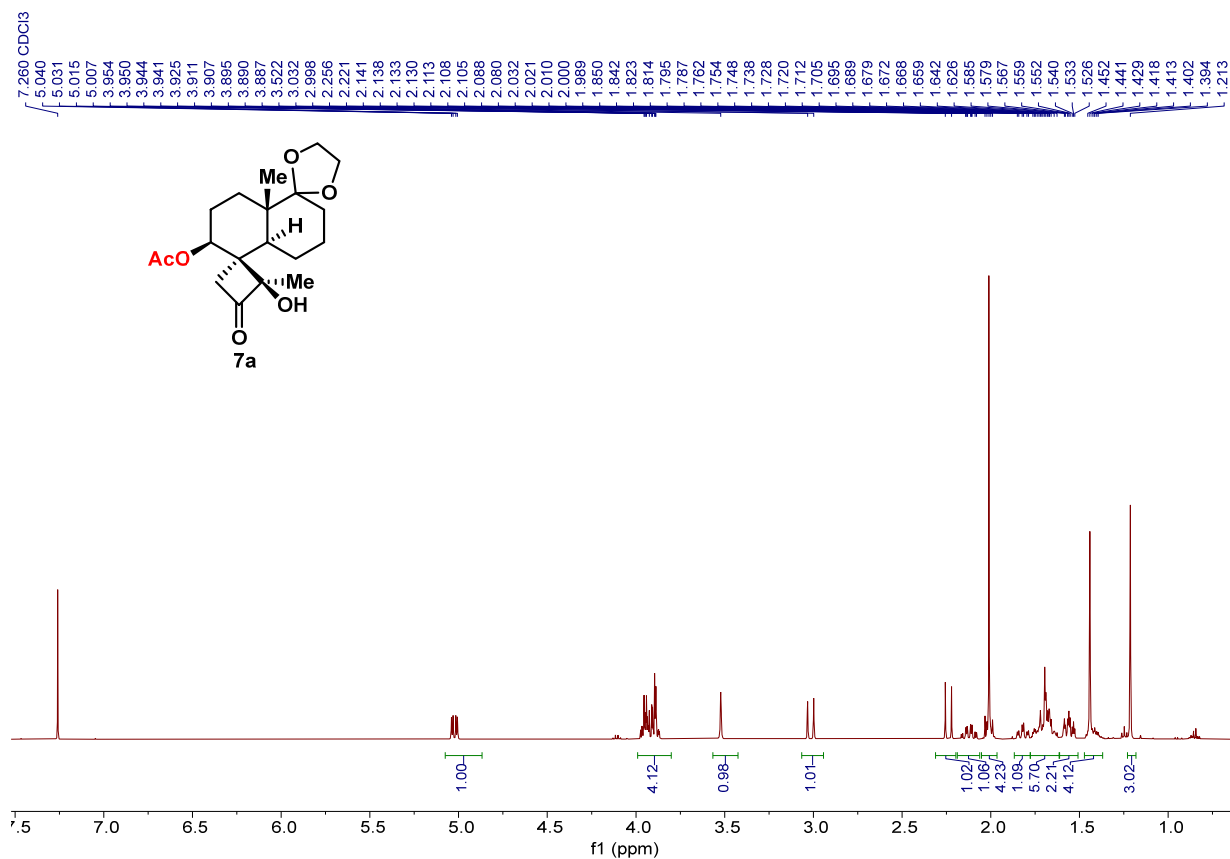

Figure S69. <sup>1</sup>H NMR Spectra of Compound 7a (CDCl<sub>3</sub>, 500 MHz)

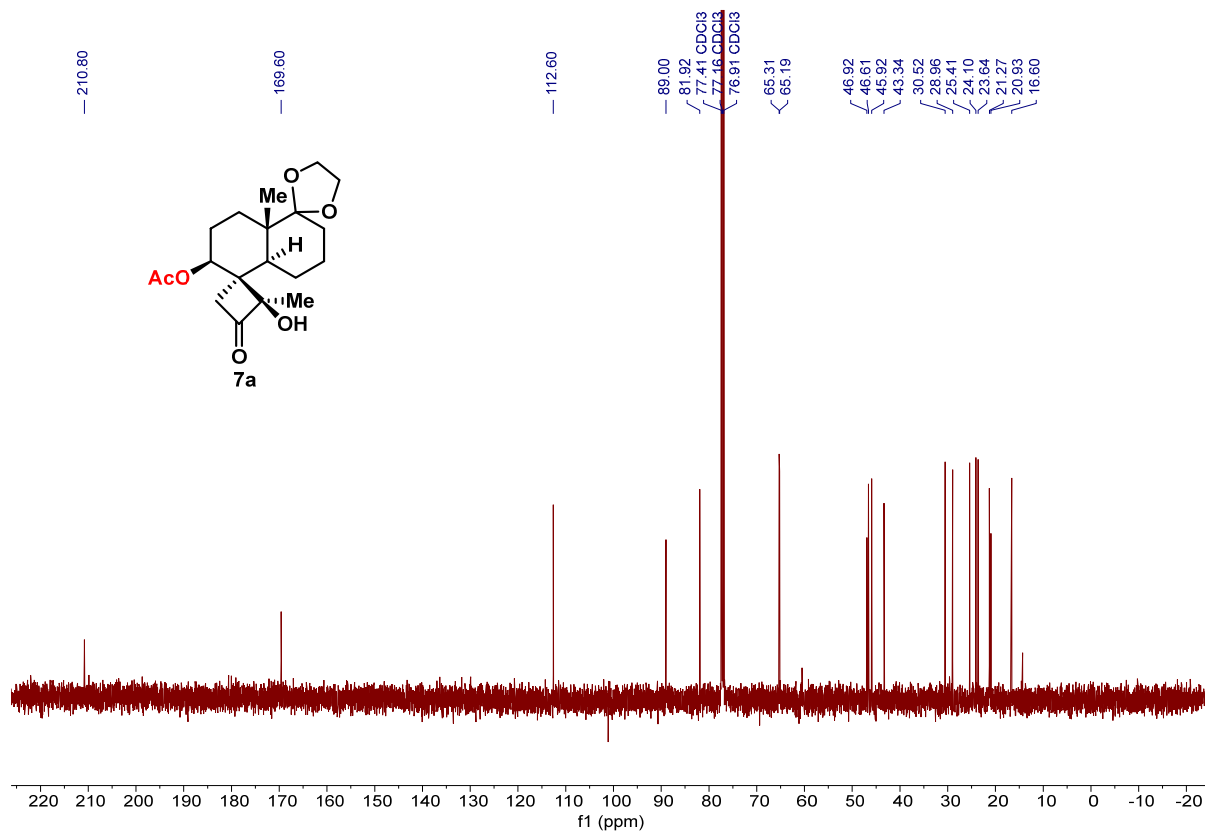

Figure S70. <sup>13</sup>C NMR Spectra of Compound 7a (CDCl<sub>3</sub>, 125 MHz)

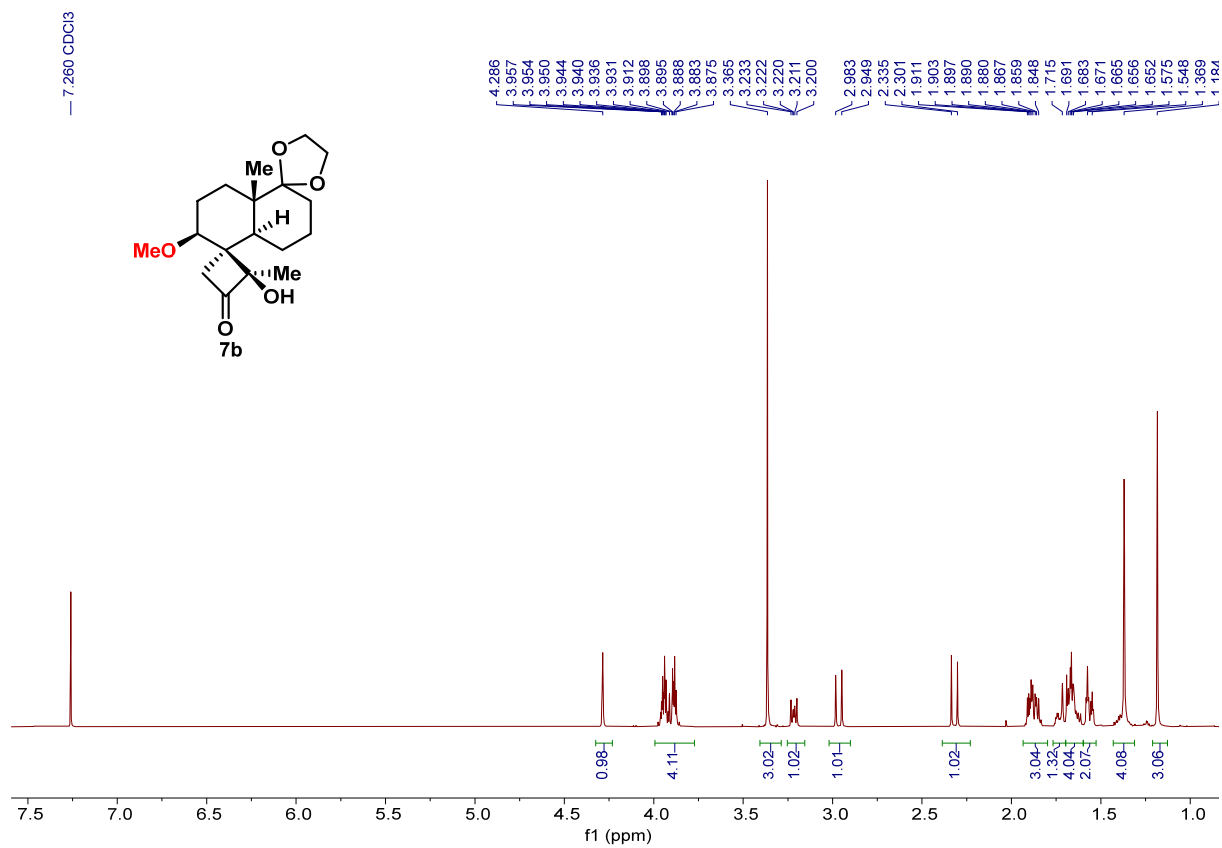

Figure S71. <sup>1</sup>H NMR Spectra of Compound **7b** (CDCl<sub>3</sub>, 500 MHz)

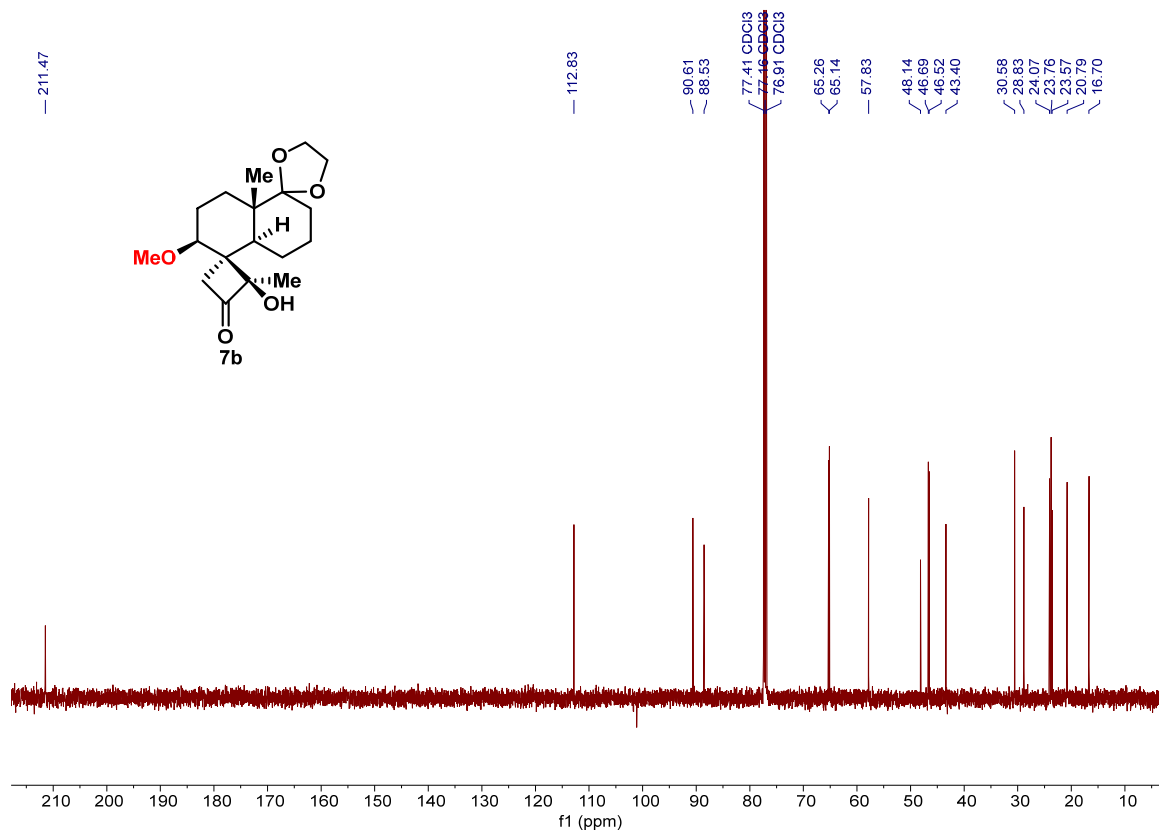

Figure S72. <sup>13</sup>C NMR Spectra of Compound **7b** (CDCl<sub>3</sub>, 125 MHz)

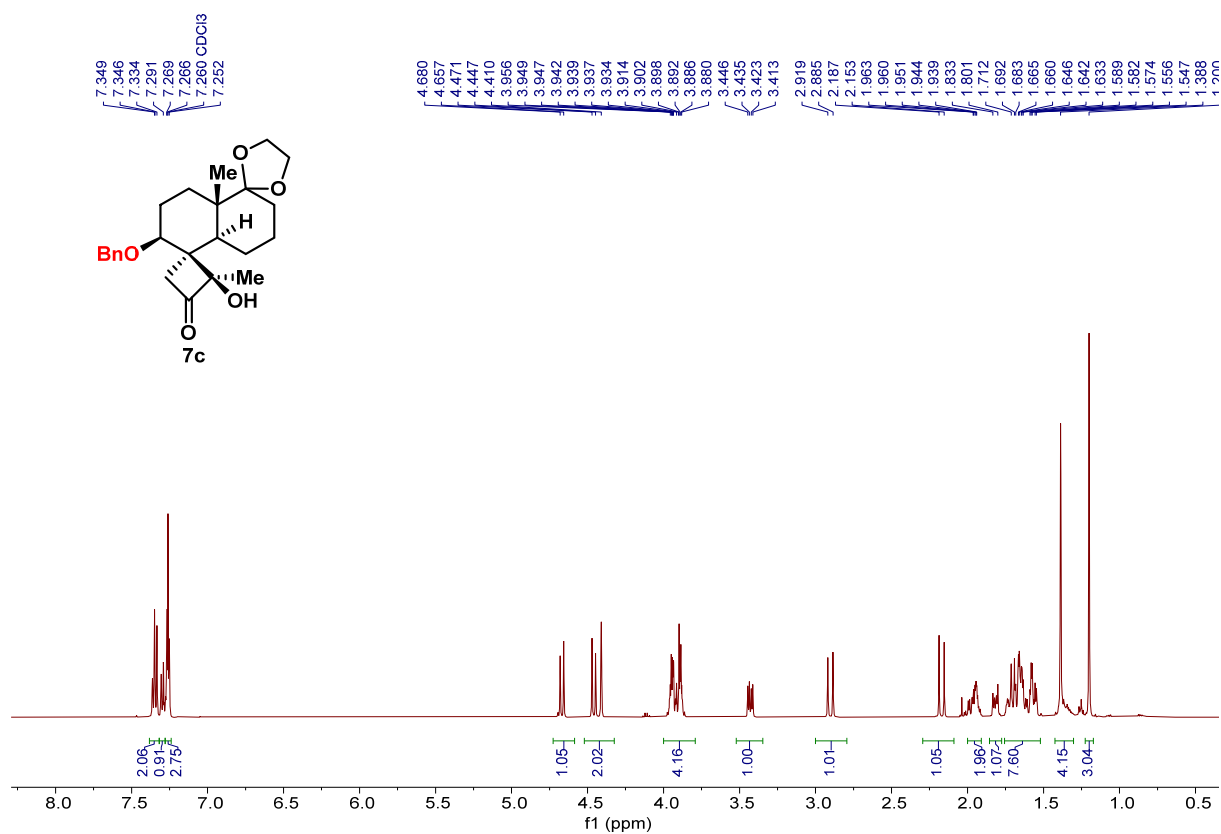

**Figure S73. <sup>1</sup>H NMR Spectra of Compound 7c (CDCl<sub>3</sub>, 500 MHz)**

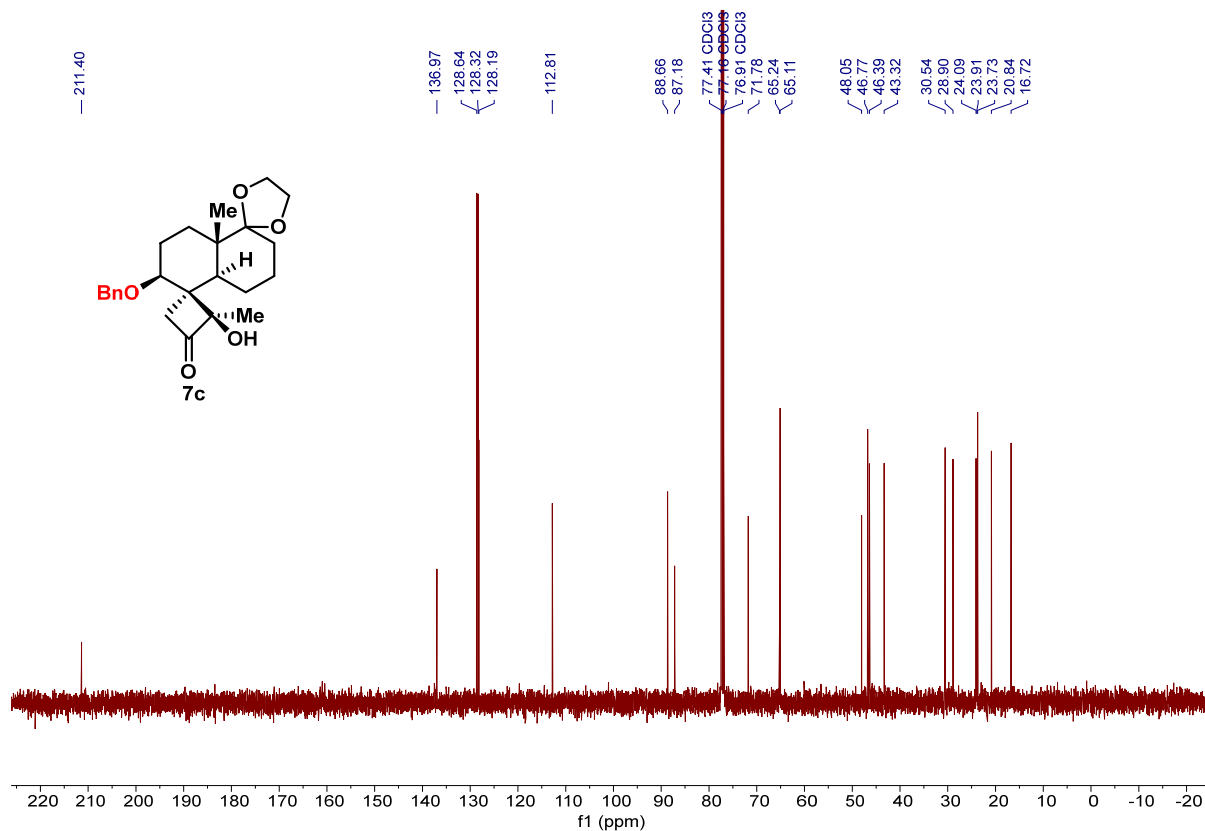

**Figure S74. <sup>13</sup>C NMR Spectra of Compound 7c (CDCl<sub>3</sub>, 125 MHz)**

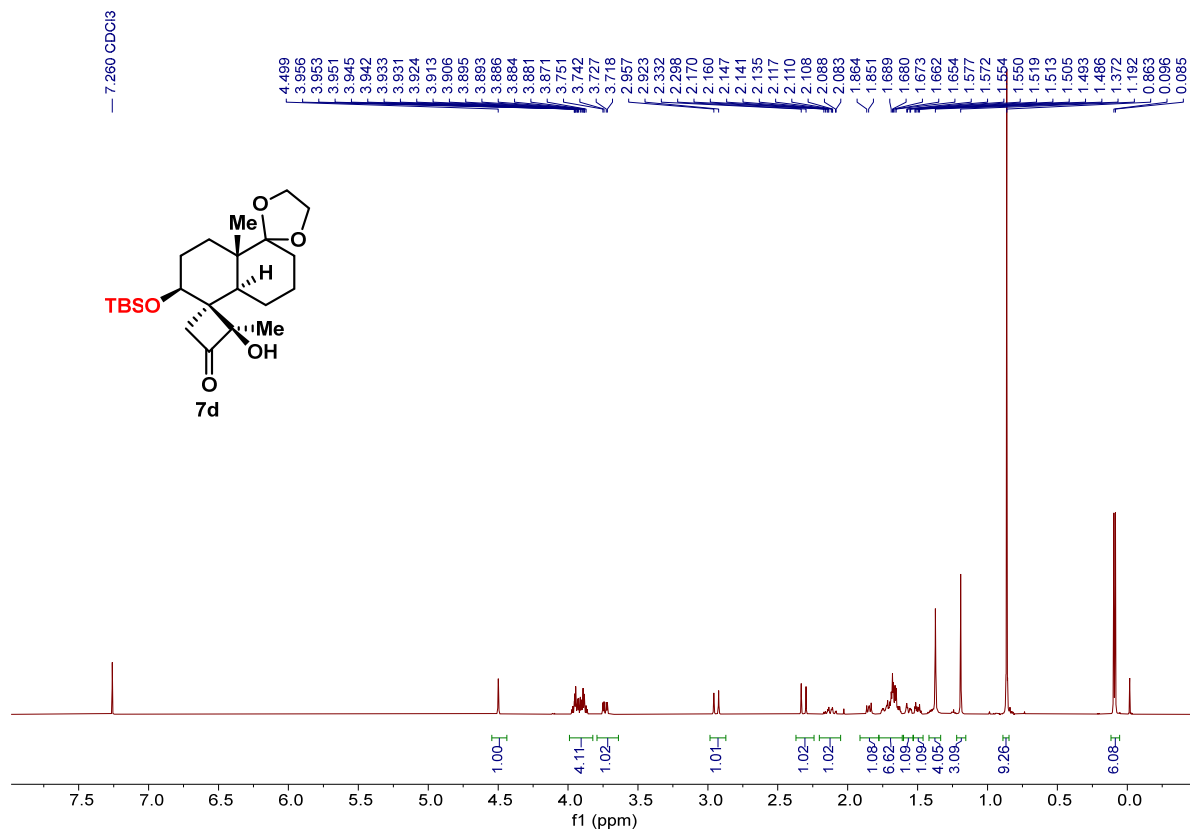

**Figure S75.** <sup>1</sup>H NMR Spectra of Compound **7d** (CDCl<sub>3</sub>, 500 MHz)

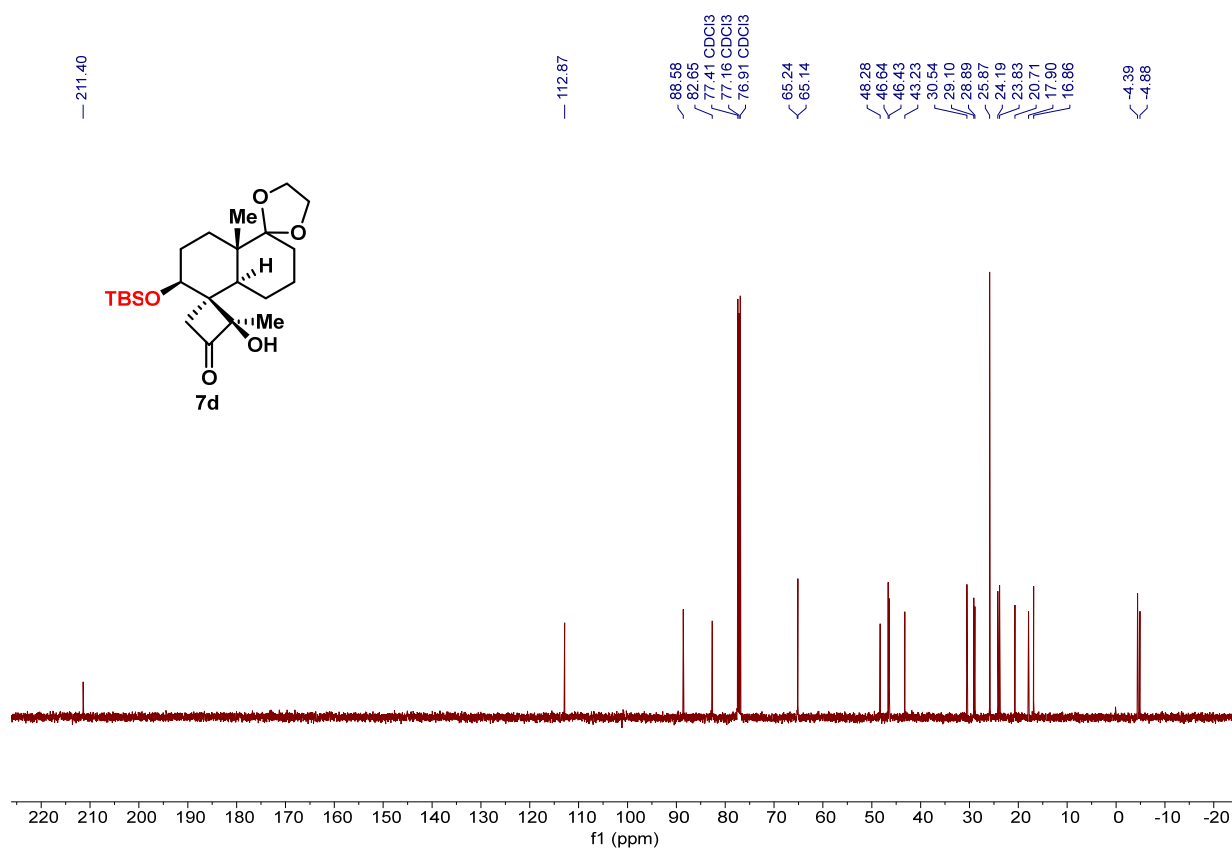

**Figure S76.** <sup>13</sup>C NMR Spectra of Compound **7d** (CDCl<sub>3</sub>, 125 MHz)



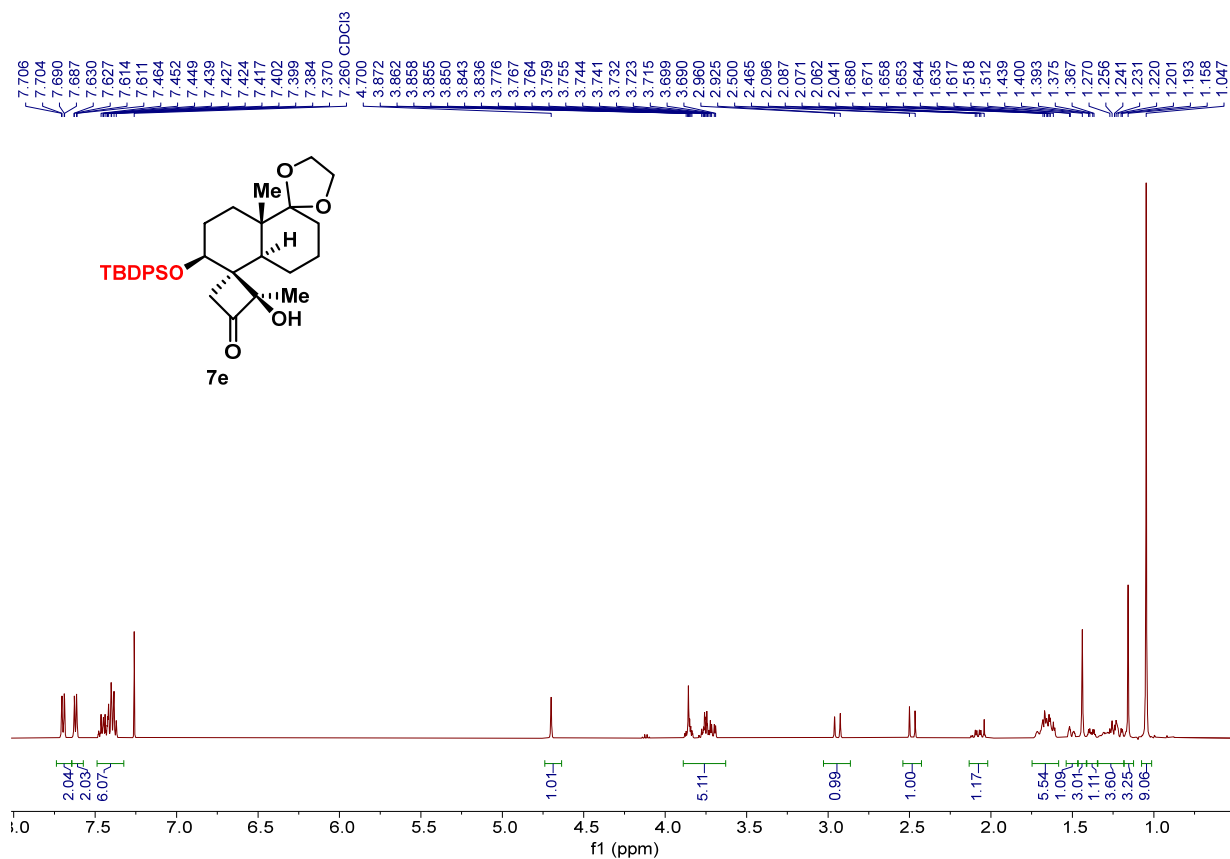

Figure S77. <sup>1</sup>H NMR Spectra of Compound 7e (CDCl<sub>3</sub>, 500 MHz)

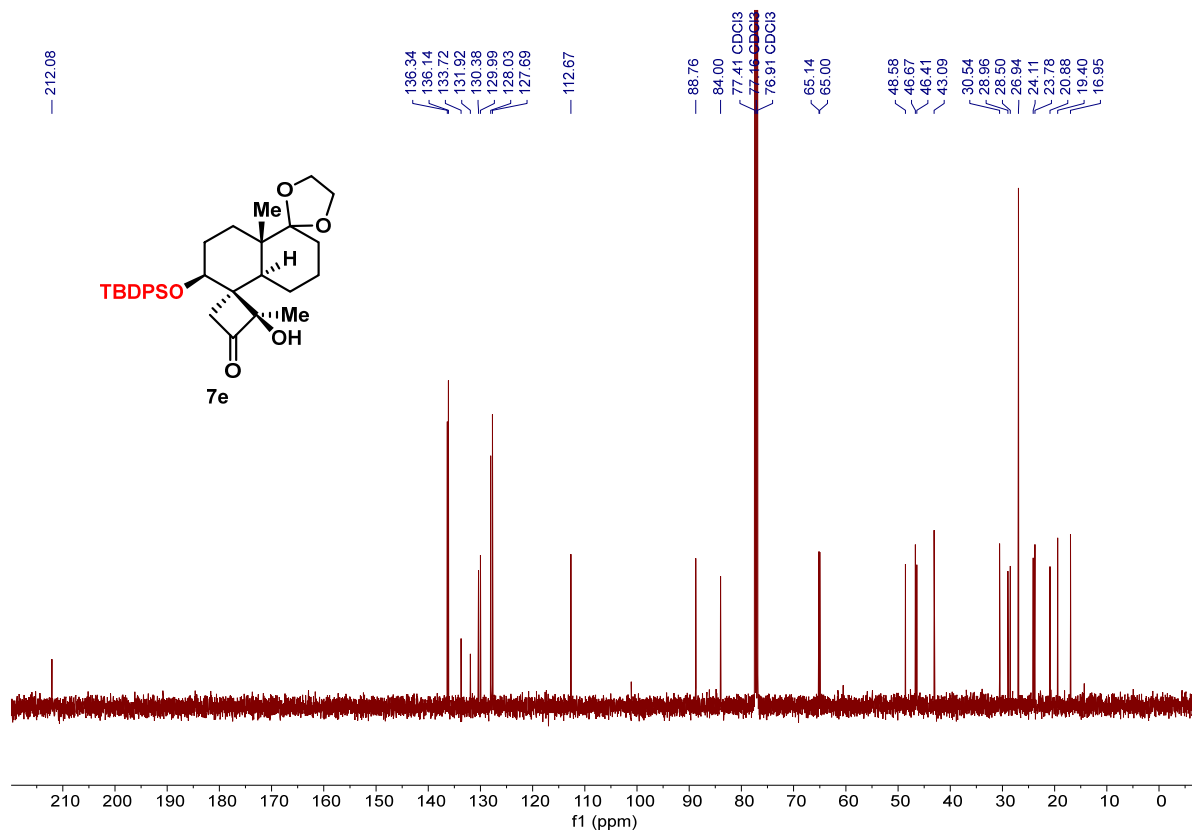

Figure S78. <sup>13</sup>C NMR Spectra of Compound 7e (CDCl<sub>3</sub>, 125 MHz)

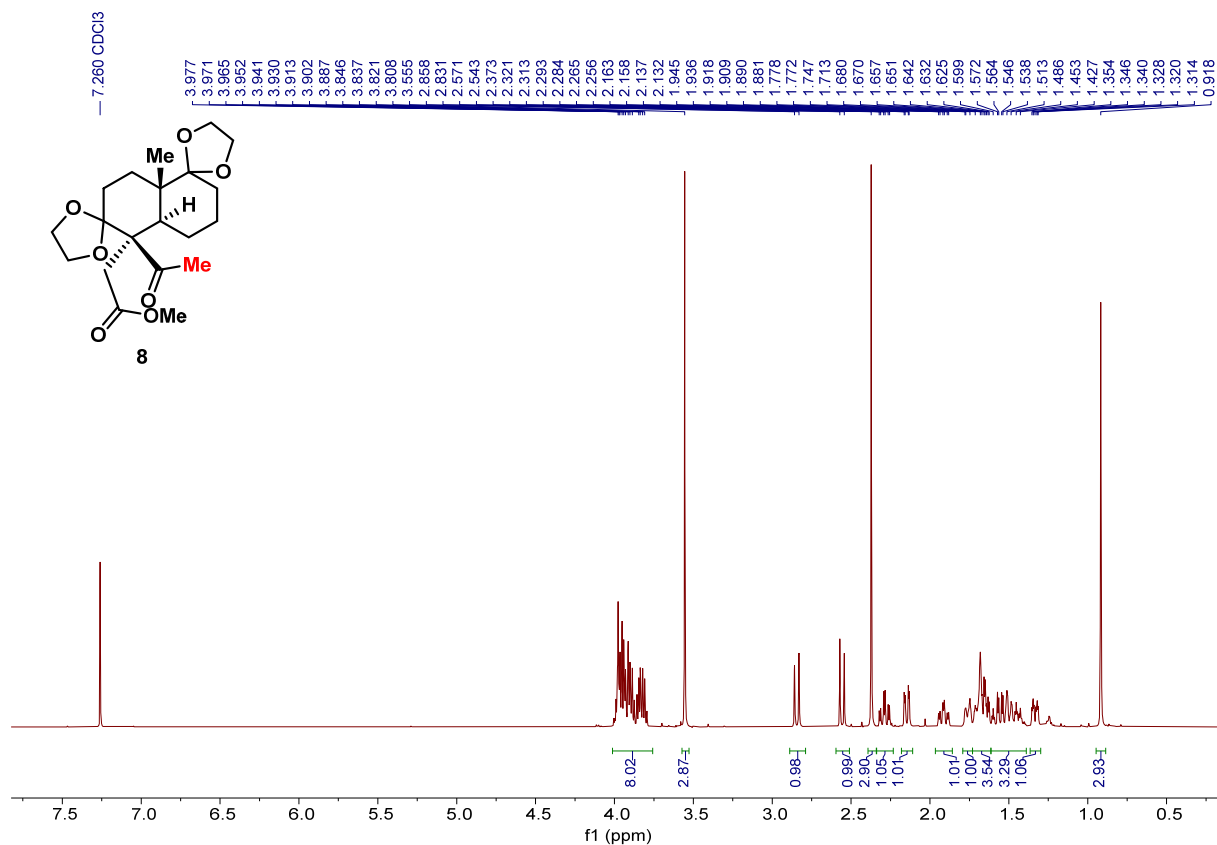

Figure S79. <sup>1</sup>H NMR Spectra of Compound **8** (CDCl<sub>3</sub>, 500 MHz)

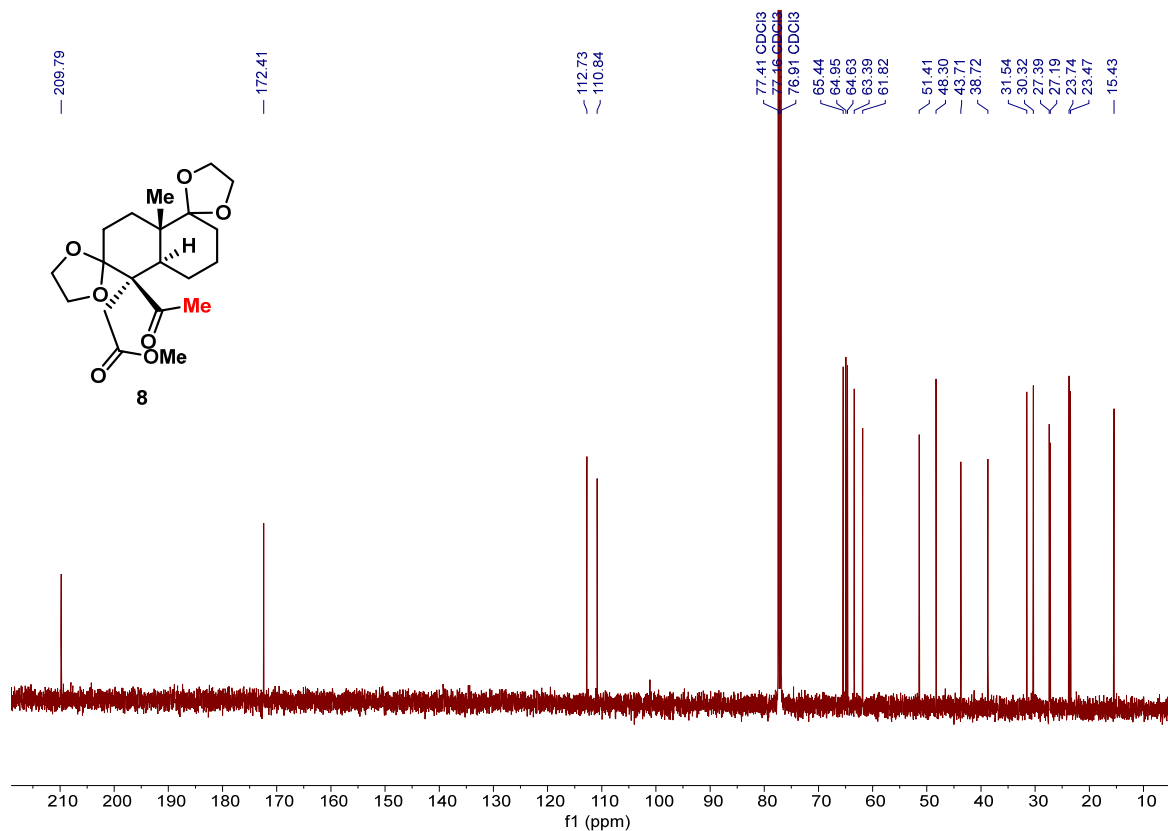

Figure S80. <sup>13</sup>C NMR Spectra of Compound **8** (CDCl<sub>3</sub>, 125 MHz)

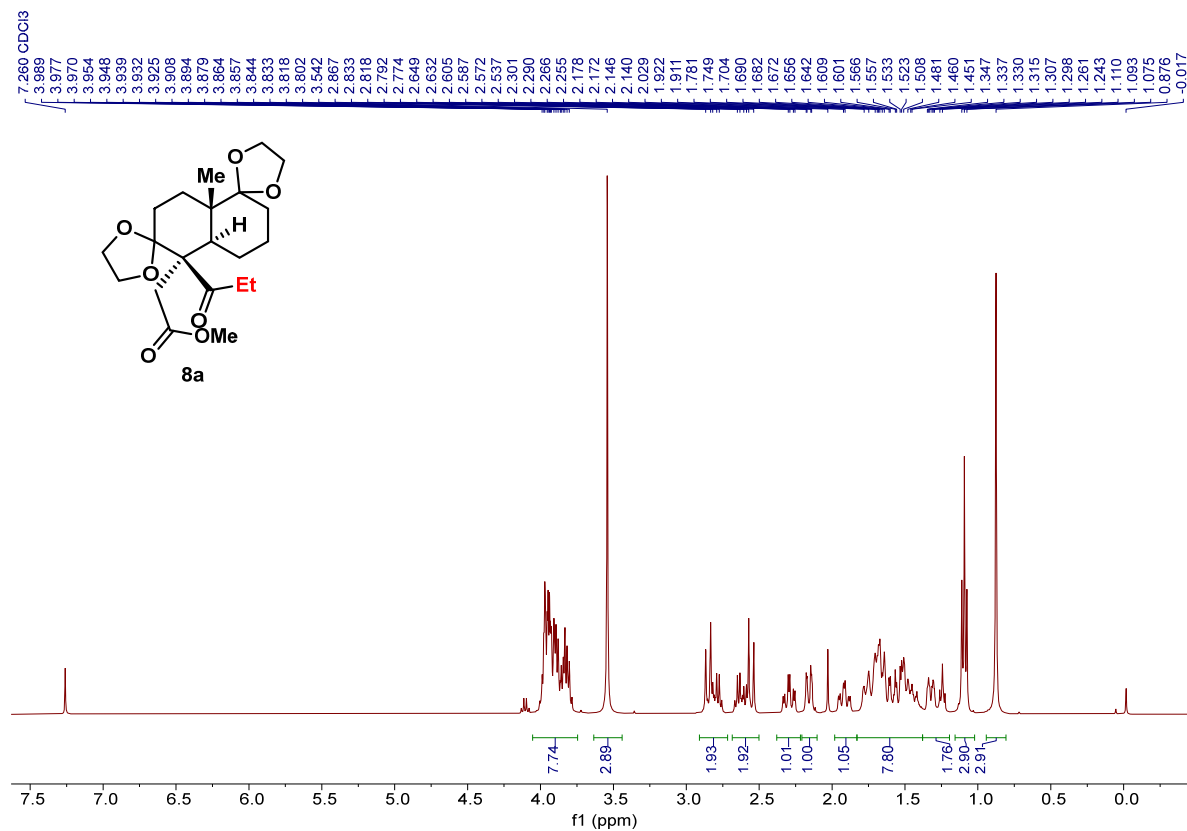

Figure S81. <sup>1</sup>H NMR Spectra of Compound **8a** (CDCl<sub>3</sub>, 400 MHz)

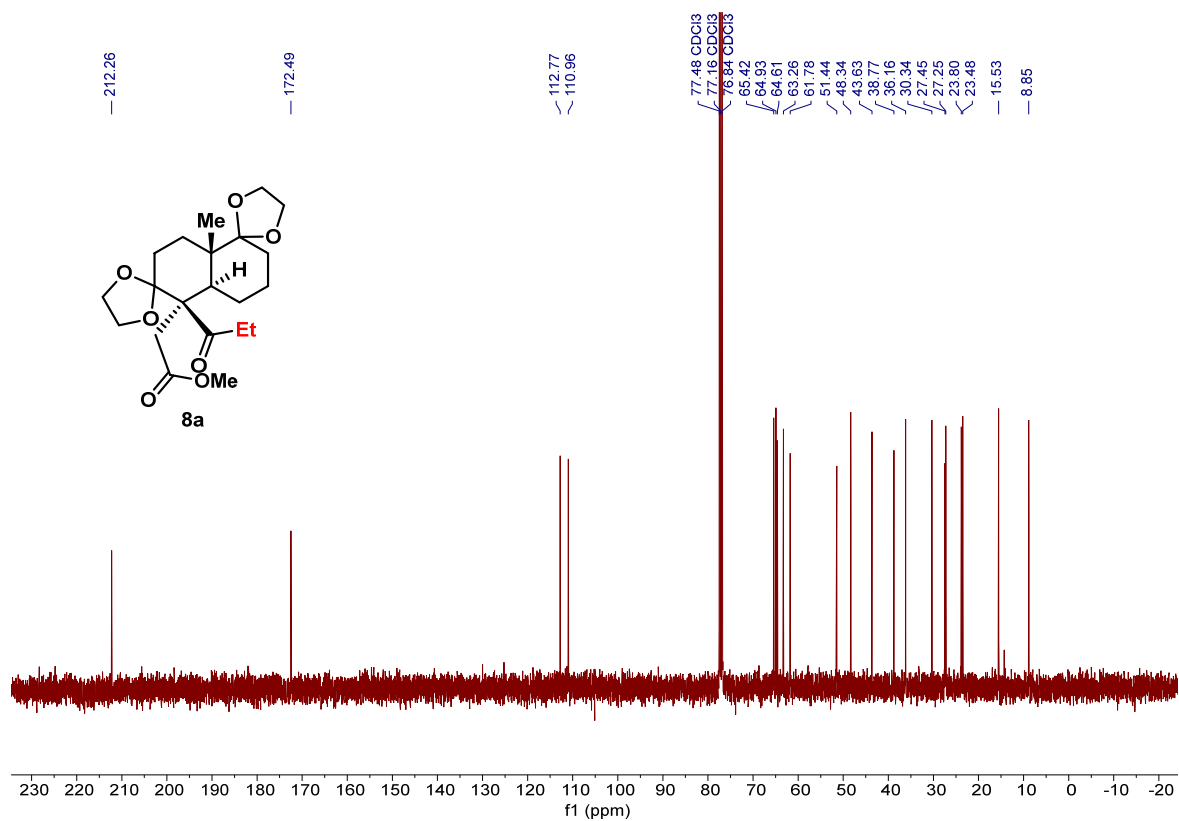

Figure S82. <sup>13</sup>C NMR Spectra of Compound **8a** (CDCl<sub>3</sub>, 100 MHz)

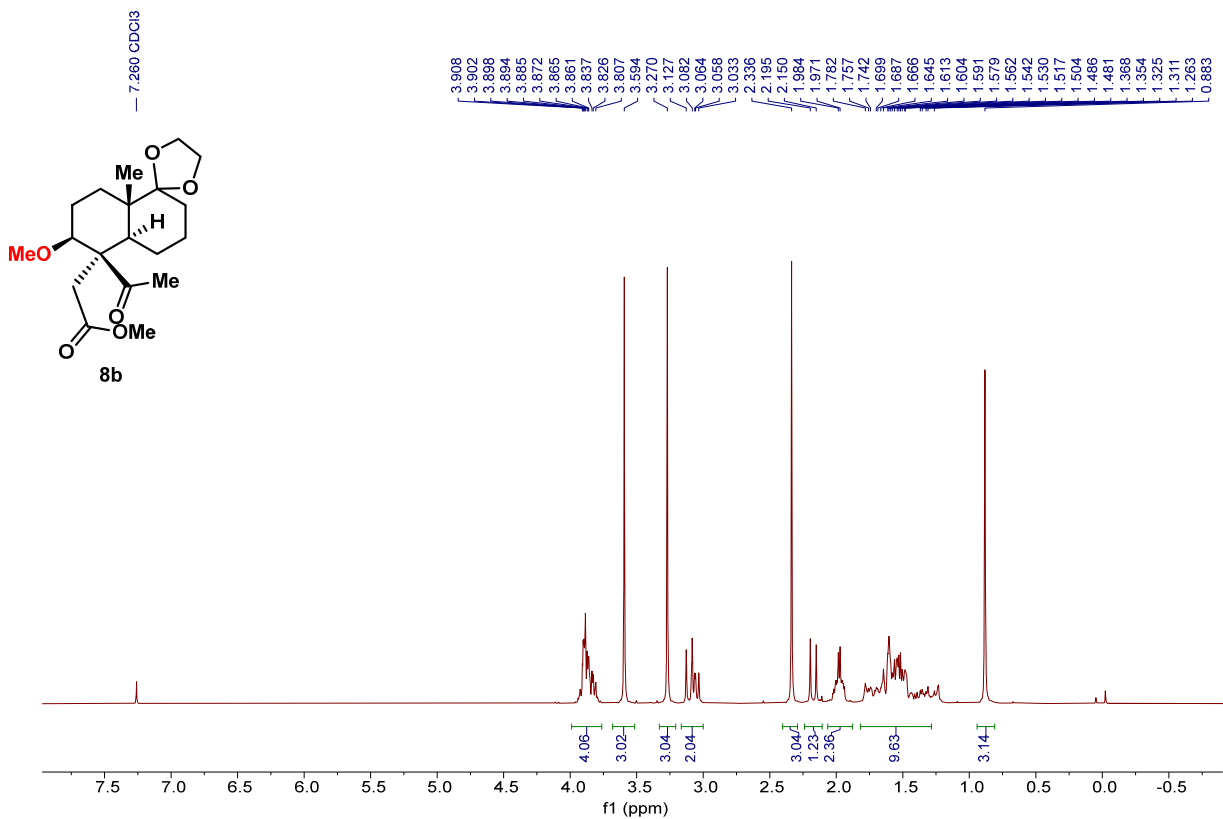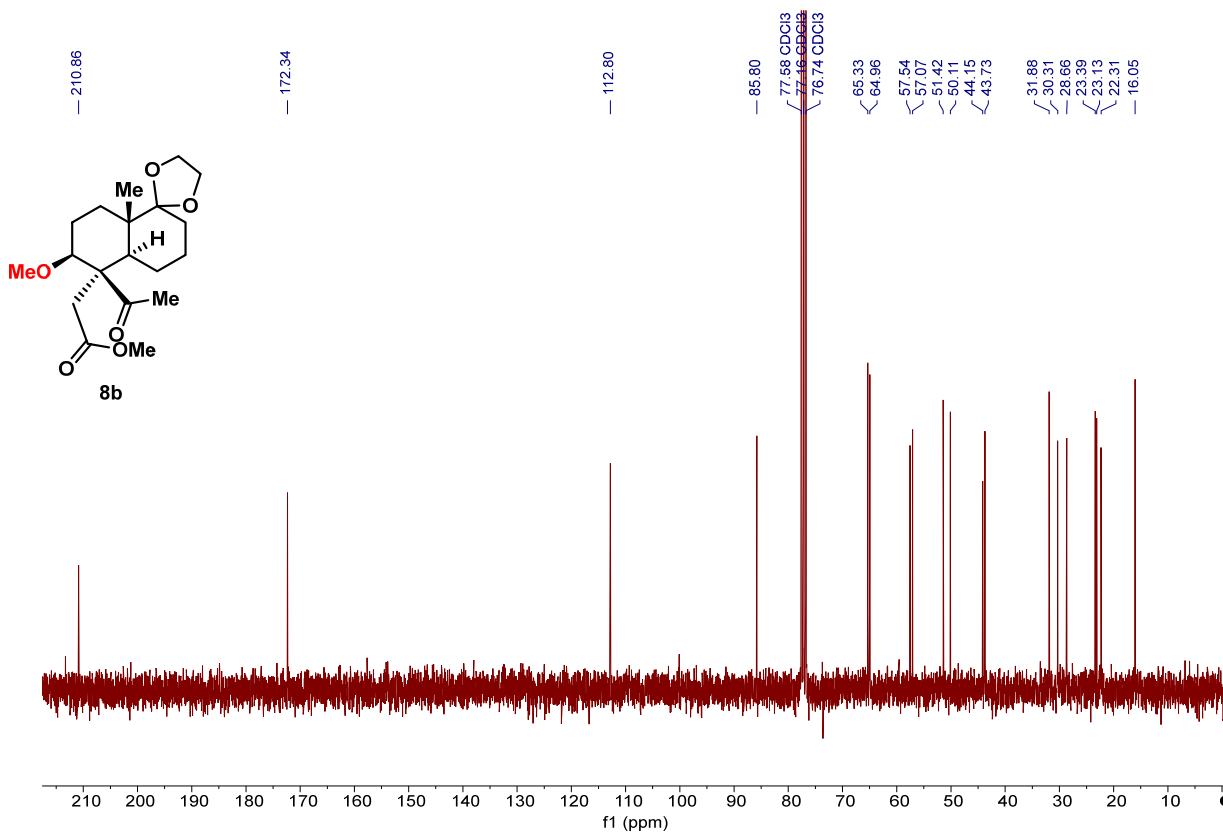

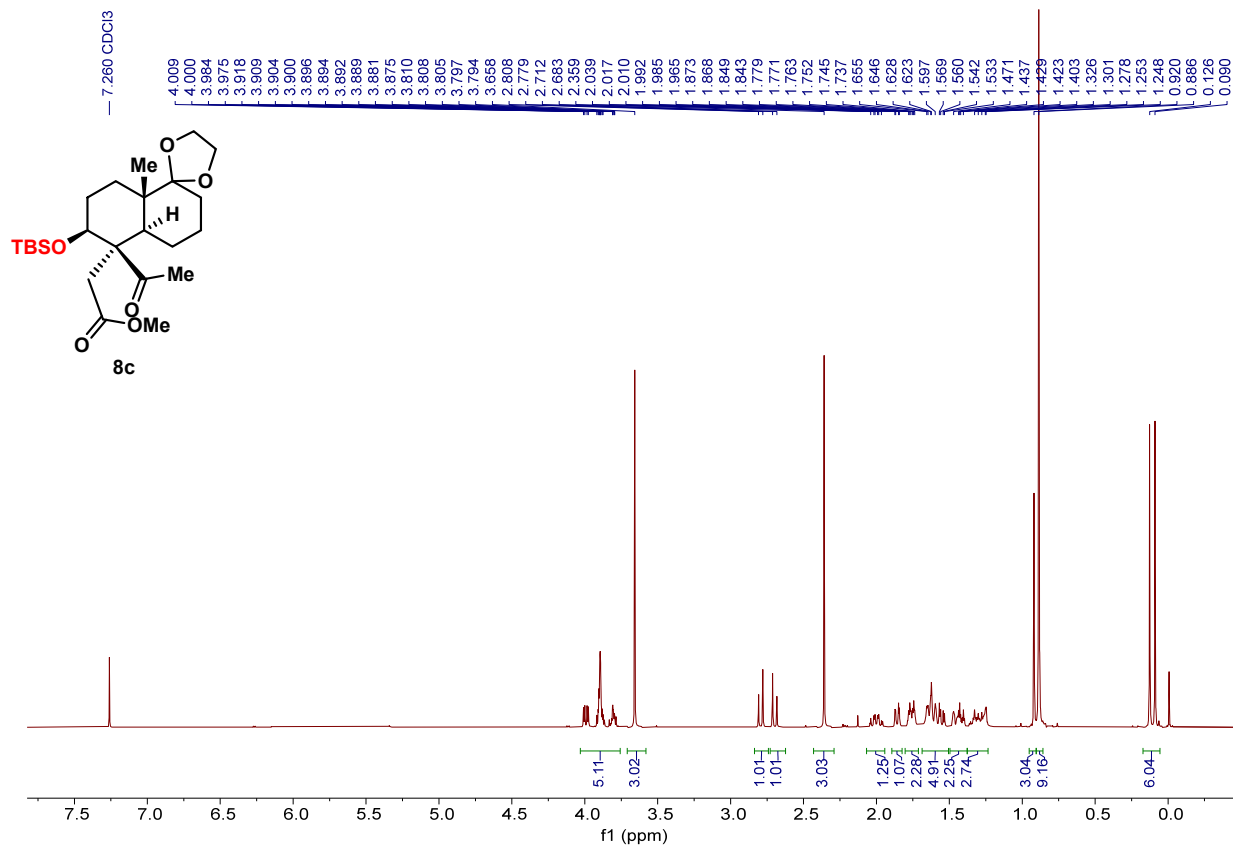

Figure S85. <sup>1</sup>H NMR Spectra of Compound **8c** (CDCl<sub>3</sub>, 500 MHz)

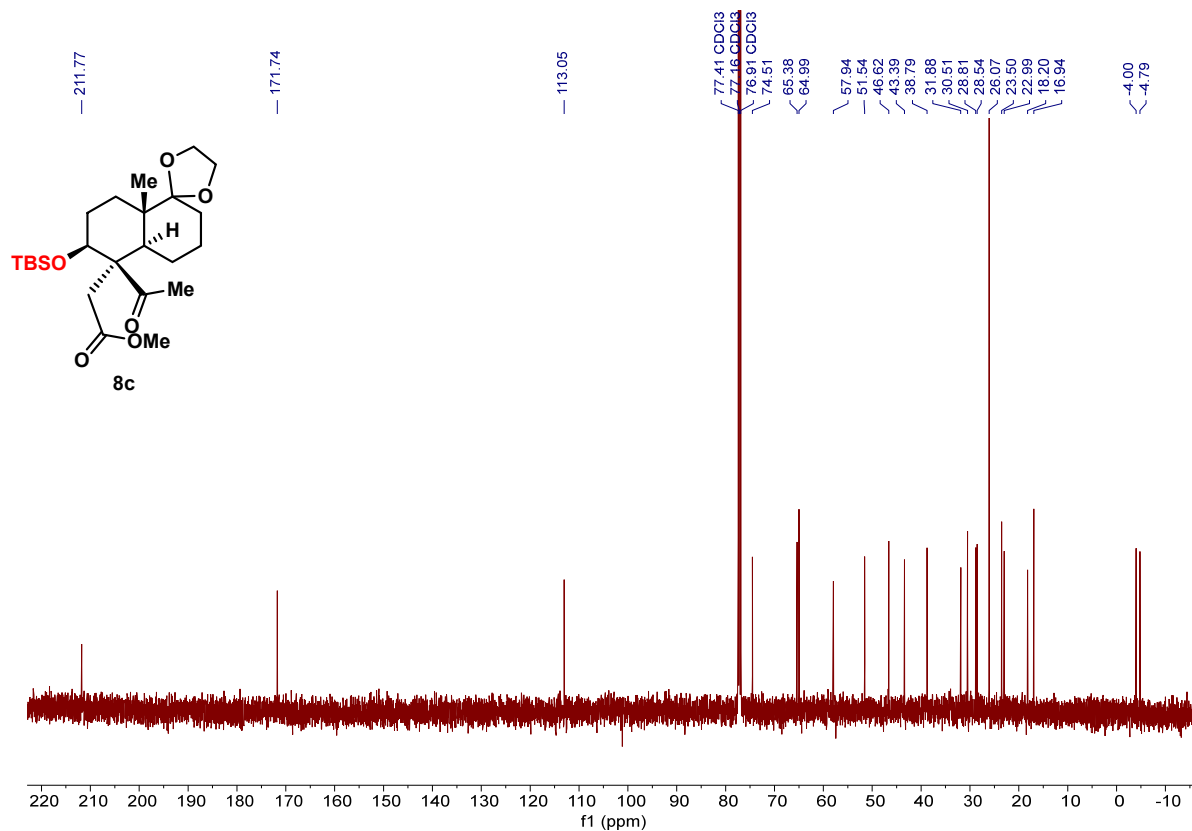

Figure S86. <sup>13</sup>C NMR Spectra of Compound **8c** (CDCl<sub>3</sub>, 125 MHz)

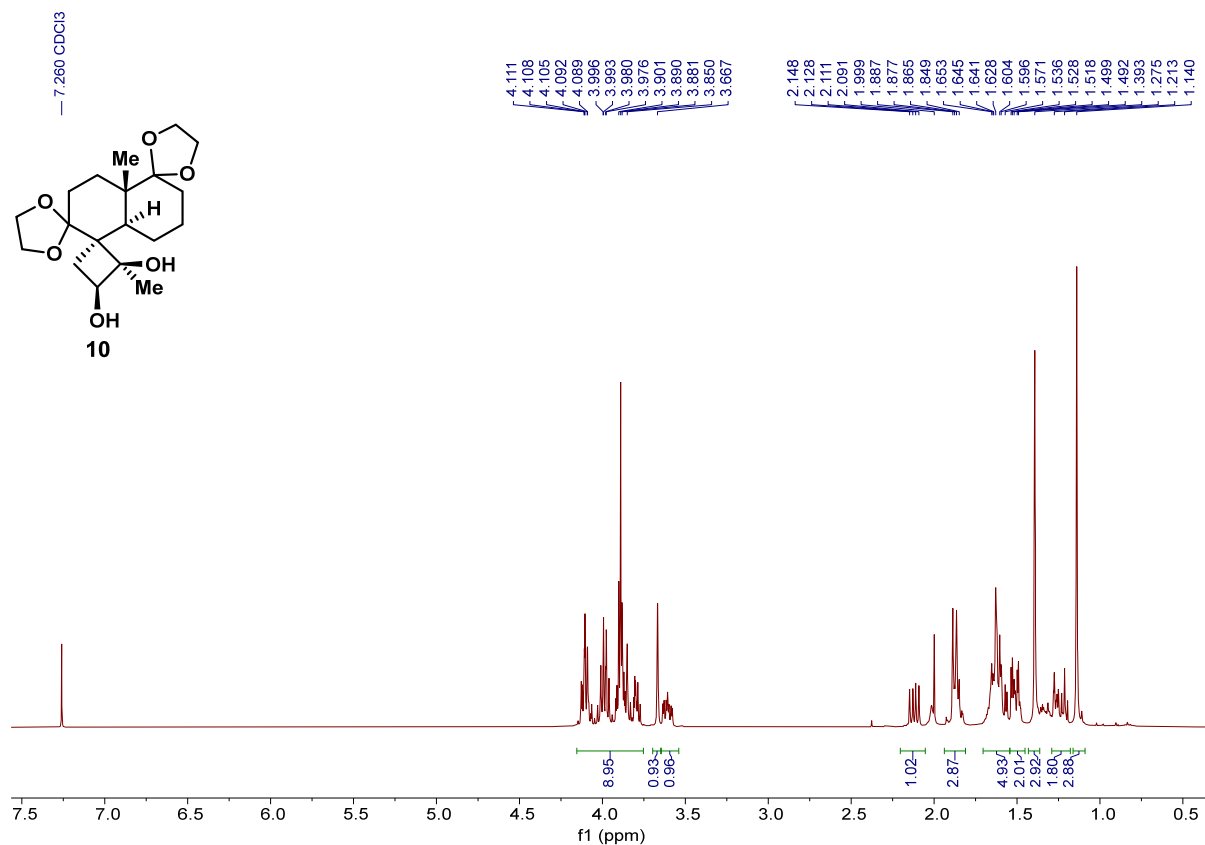

Figure S87. <sup>1</sup>H NMR Spectra of Compound 10 (CDCl<sub>3</sub>, 300 MHz)

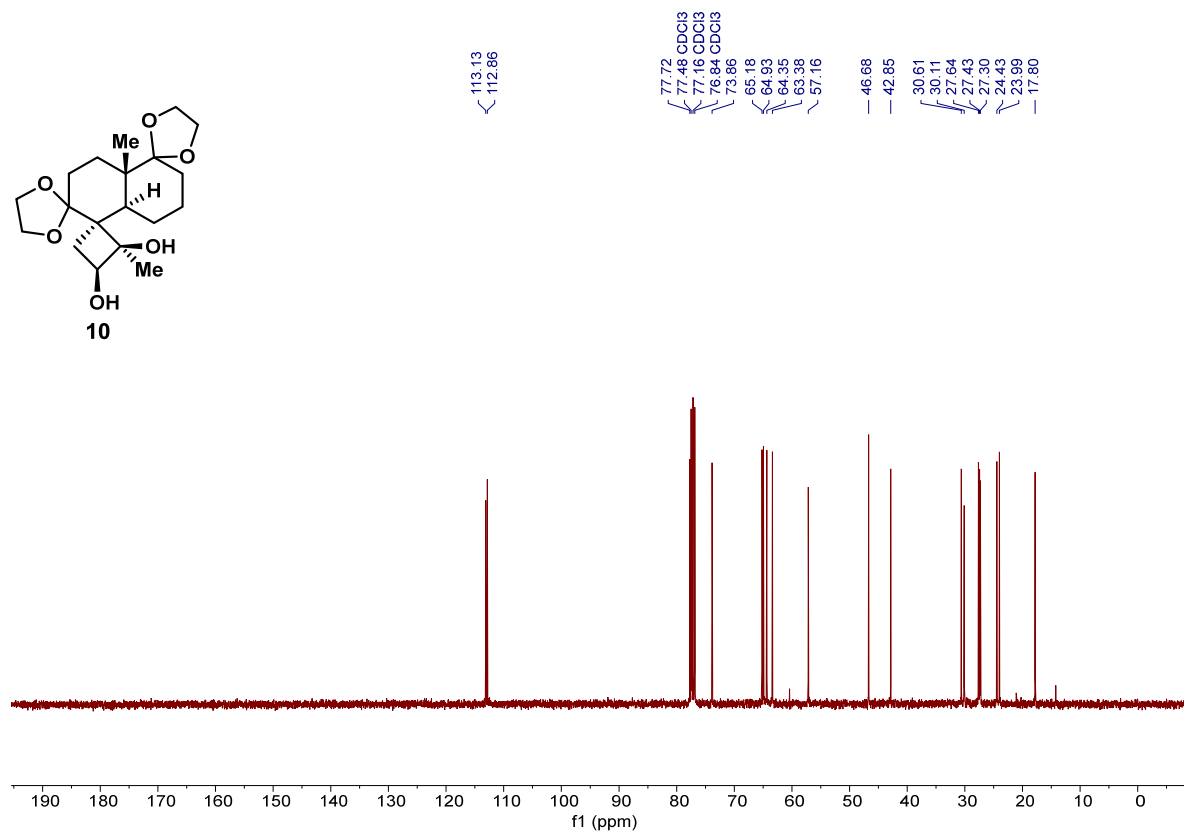

Figure S88. <sup>13</sup>C NMR Spectra of Compound 10 (CDCl<sub>3</sub>, 100 MHz)

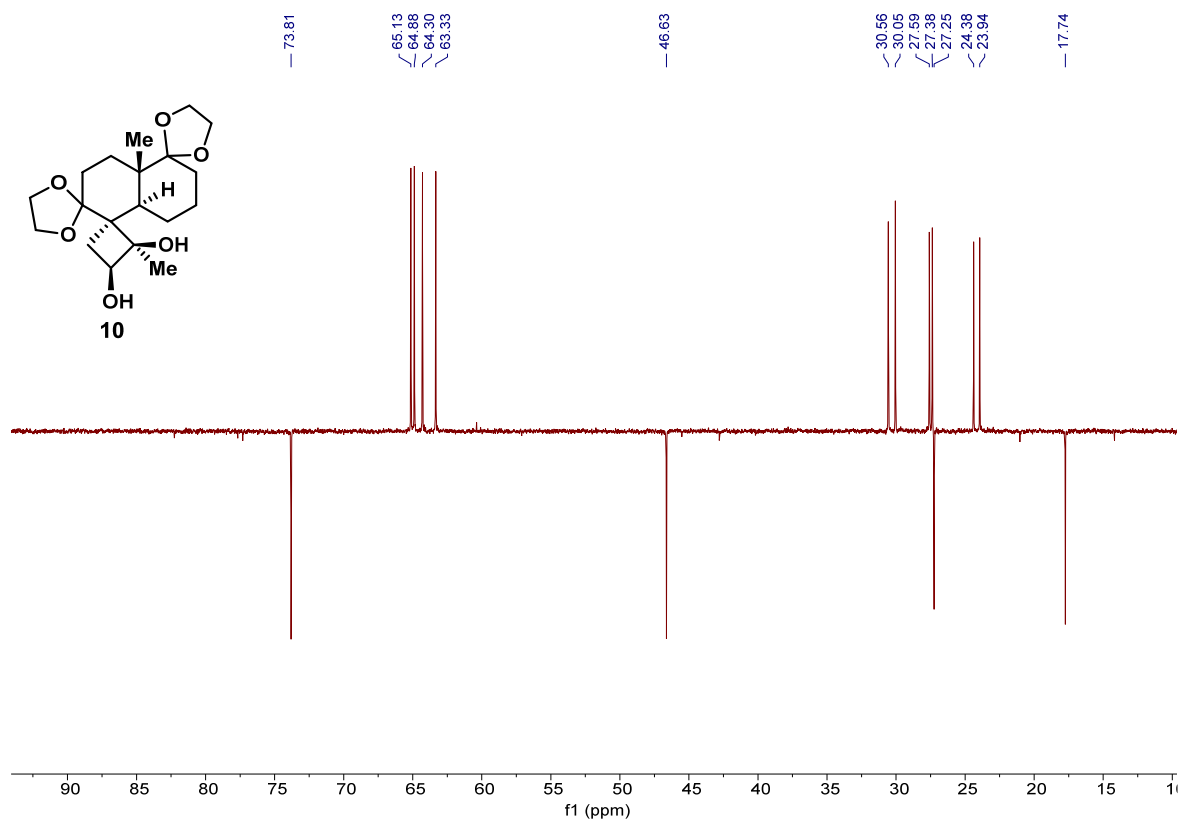

**Figure S89.** DEPT NMR Spectra of Compound **10** (CDCl<sub>3</sub>, 100 MHz)

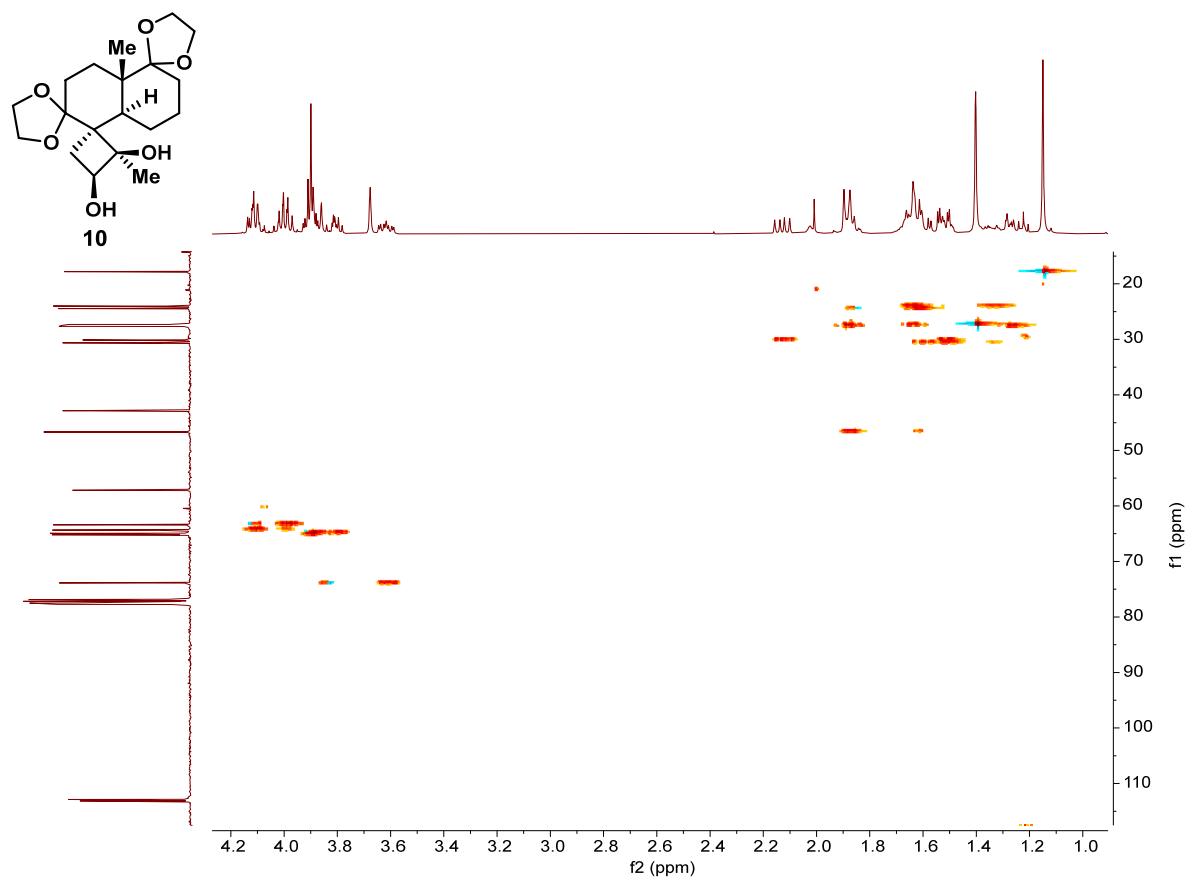

**Figure S90.** HSQC Spectra of Compound **10** (CDCl<sub>3</sub>, 400 MHz)

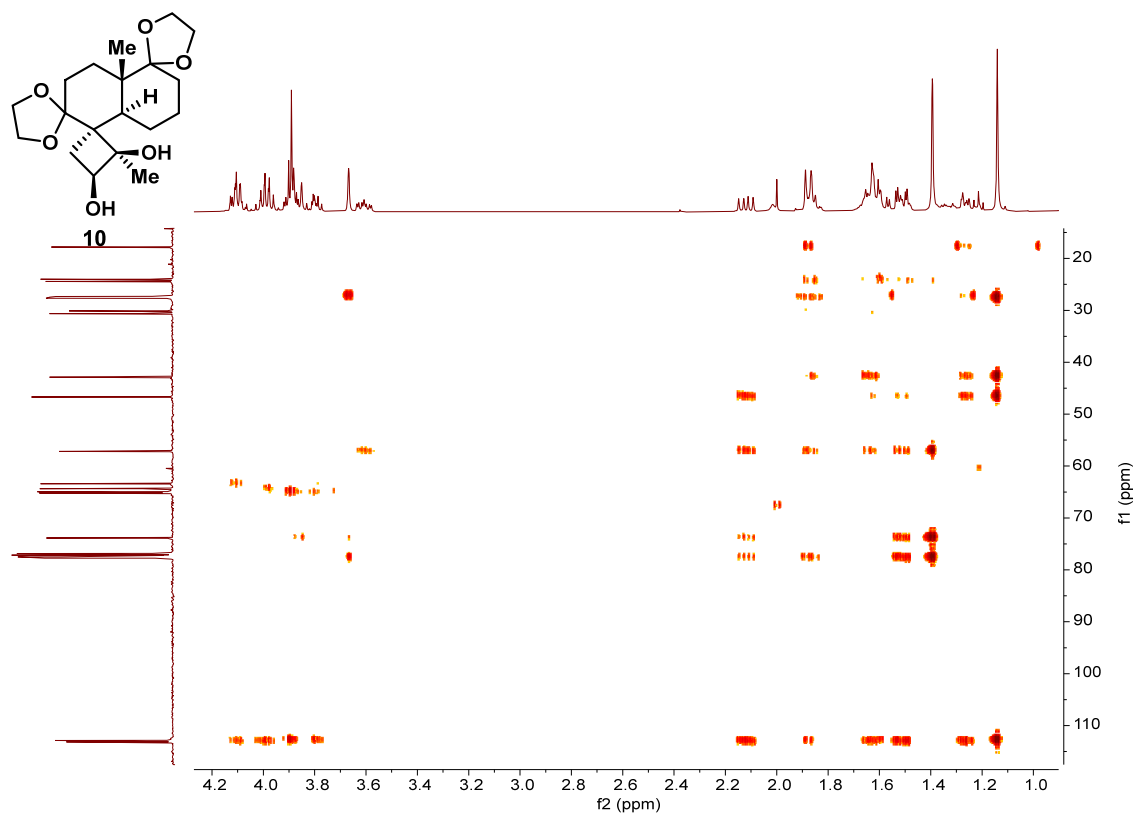

**Figure S91.** HMBC Spectra of Compound **10** (CDCl<sub>3</sub>, 400 MHz)

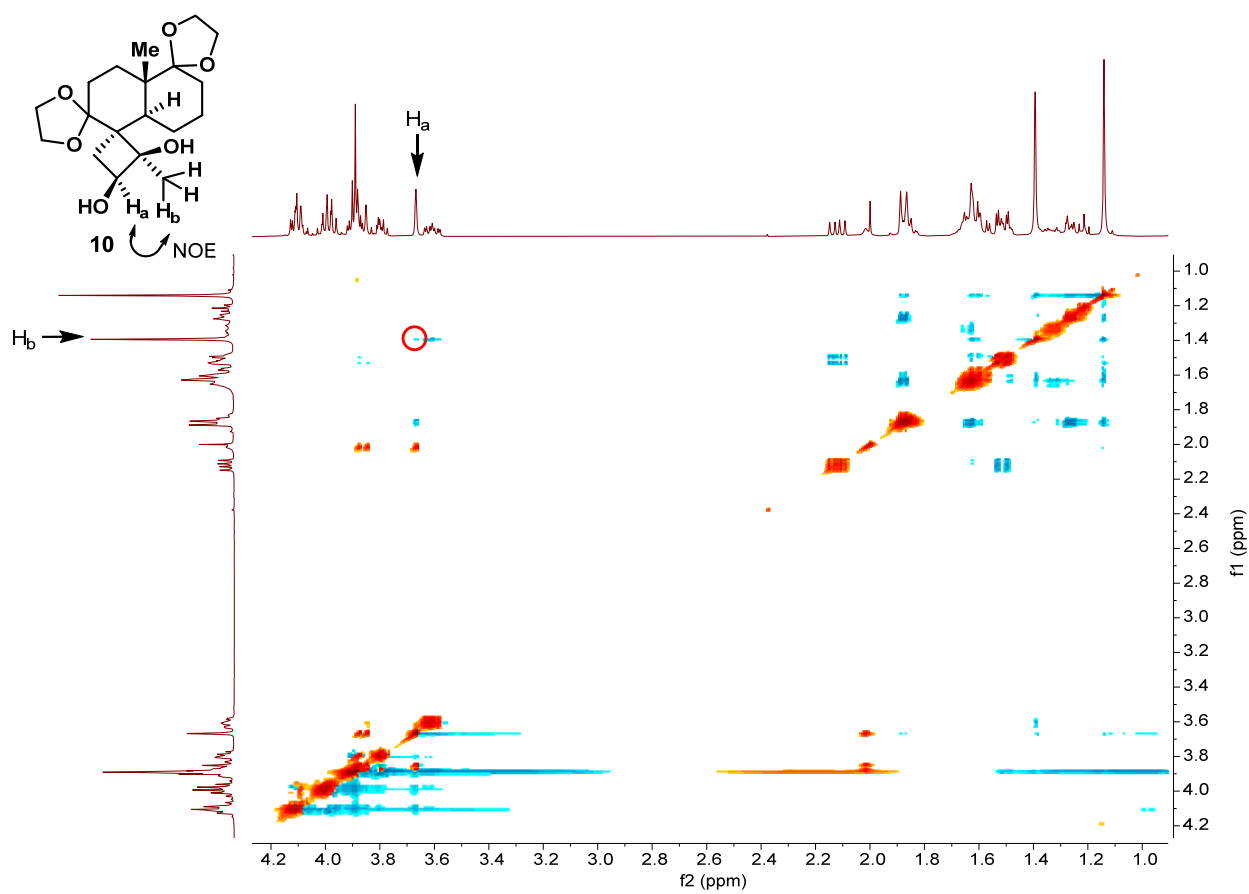

**Figure S92.** NOESY Spectra of Compound **10** (CDCl<sub>3</sub>, 400 MHz)



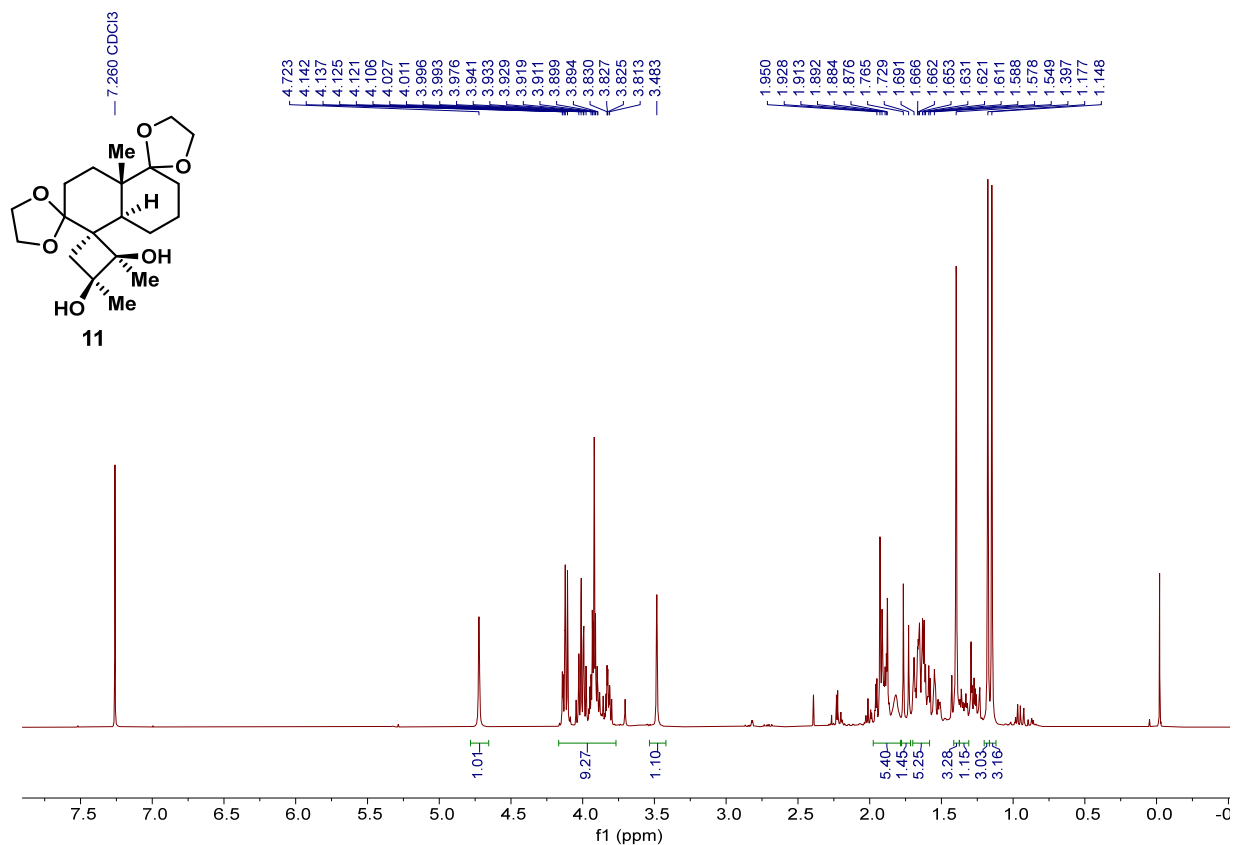

Figure S93. <sup>1</sup>H NMR Spectra of Compound **11** (CDCl<sub>3</sub>, 400 MHz)

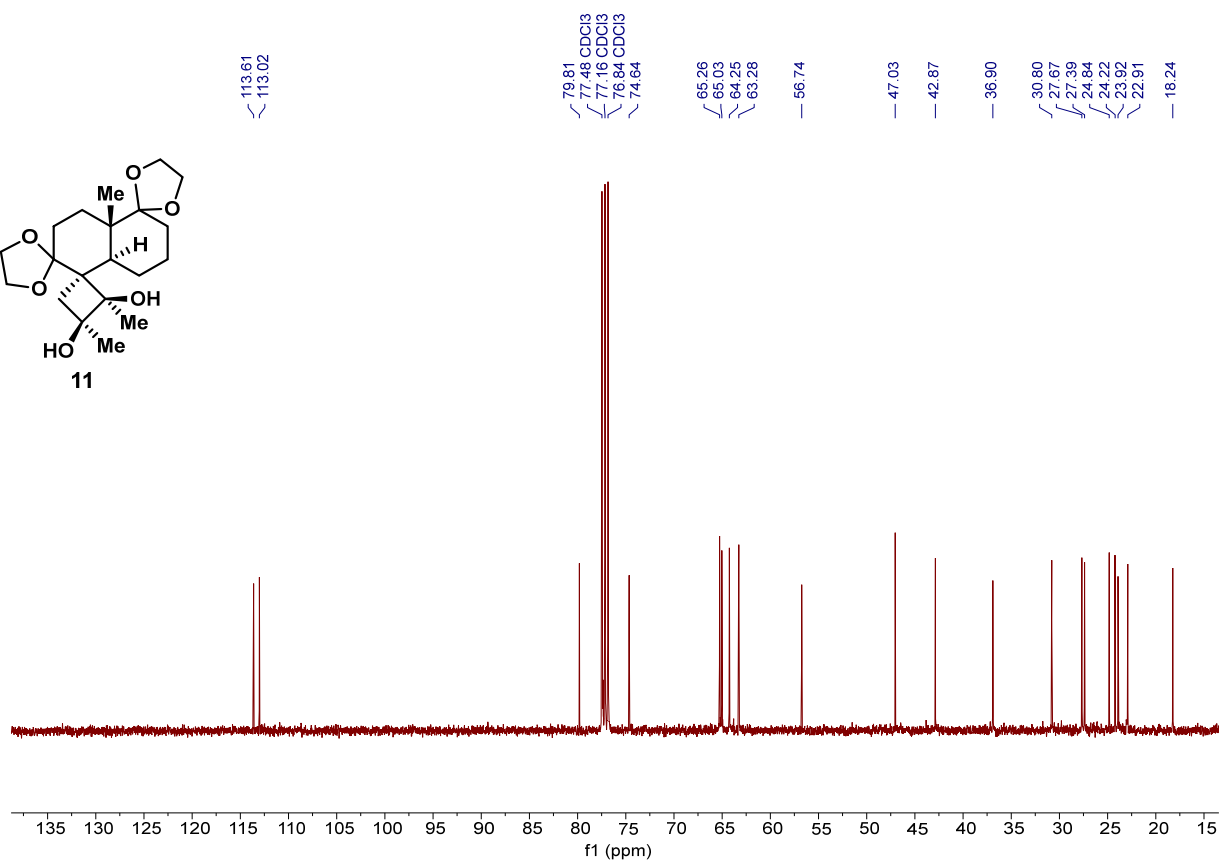

Figure S94. <sup>13</sup>C NMR Spectra of Compound **11** (CDCl<sub>3</sub>, 100 MHz)

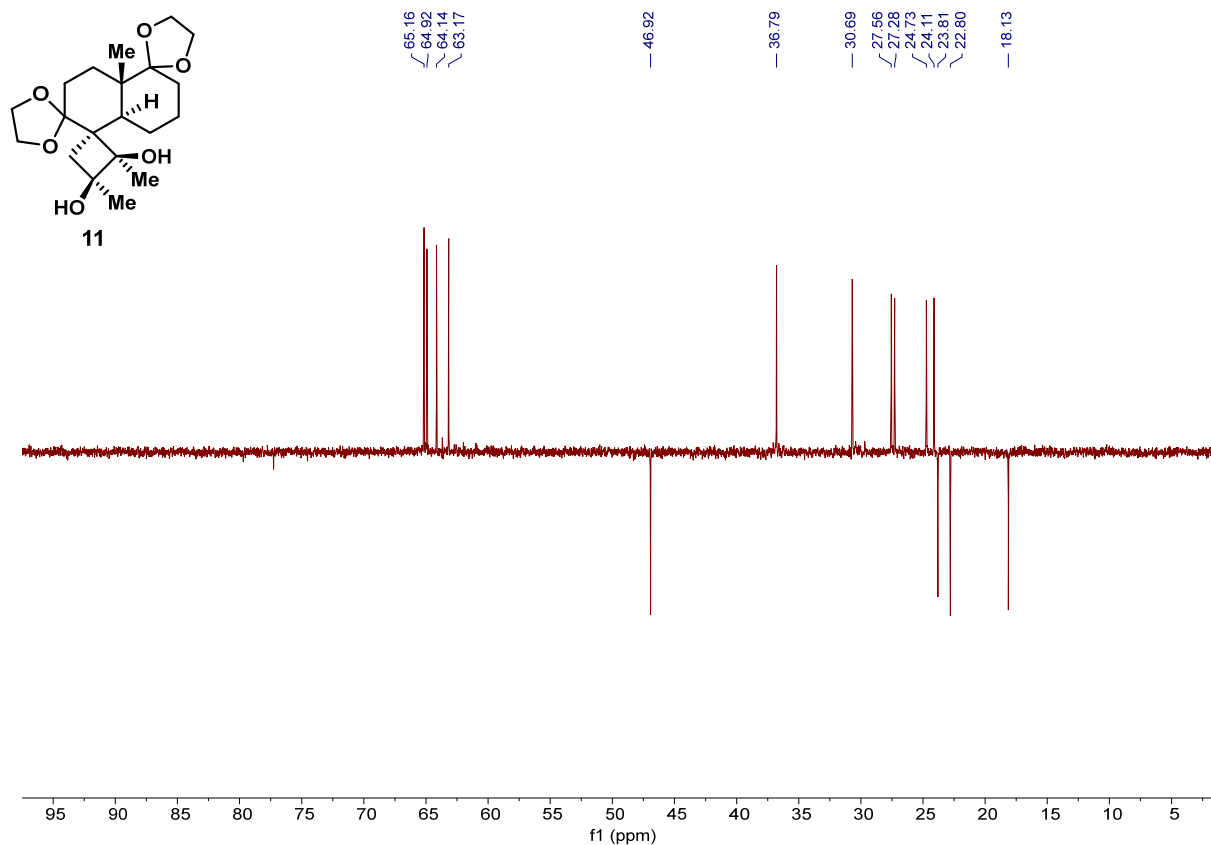

Figure S95. DEPT Spectra of Compound **11** (CDCl<sub>3</sub>, 100 MHz)

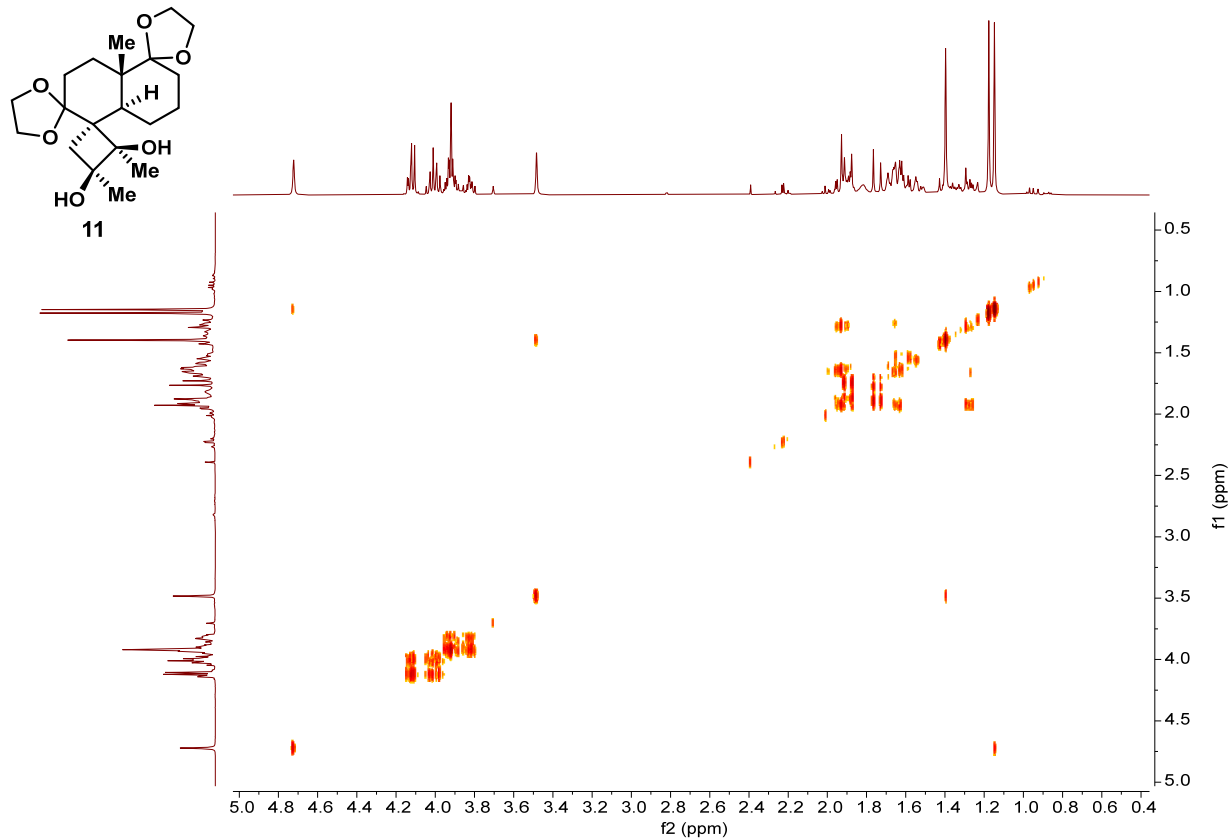

Figure S96. COSY Spectra of Compound **11** (CDCl<sub>3</sub>, 400 MHz)

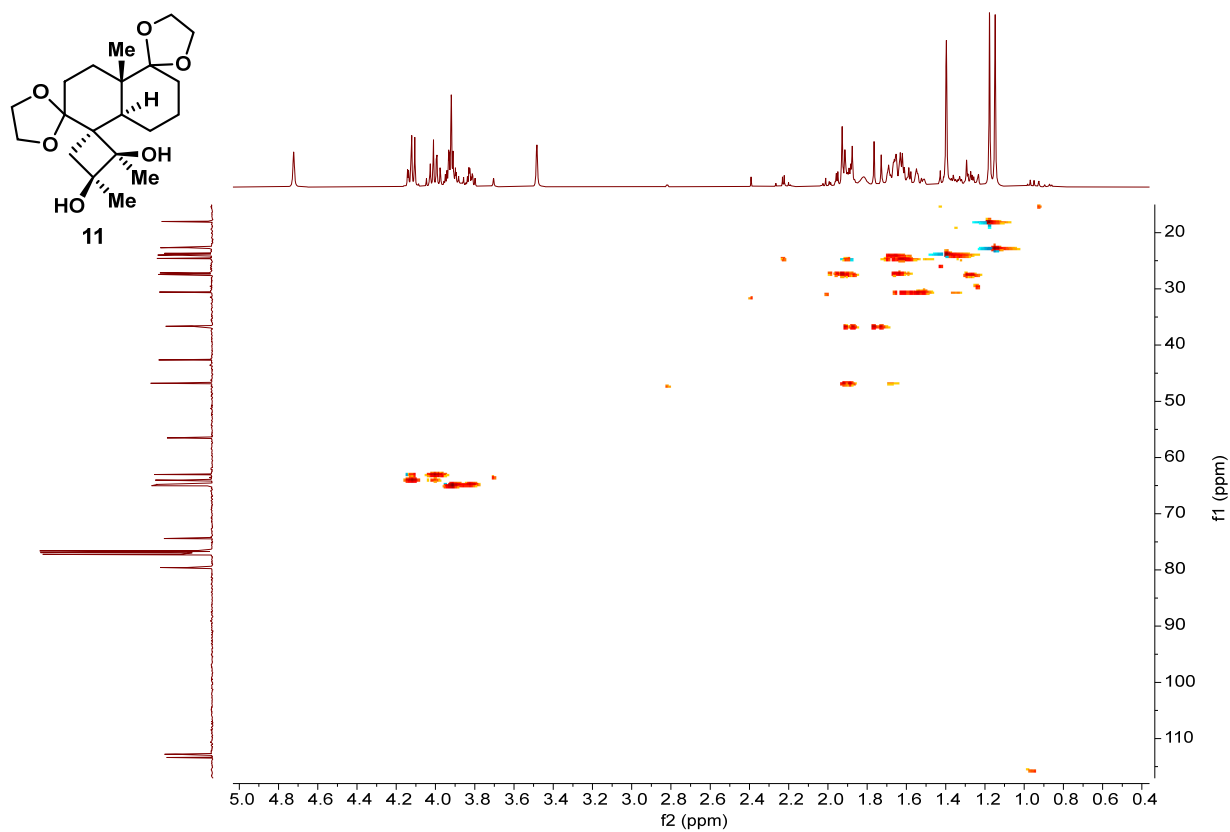

Figure S97. HSQC Spectra of Compound **11** (CDCl<sub>3</sub>, 400 MHz)

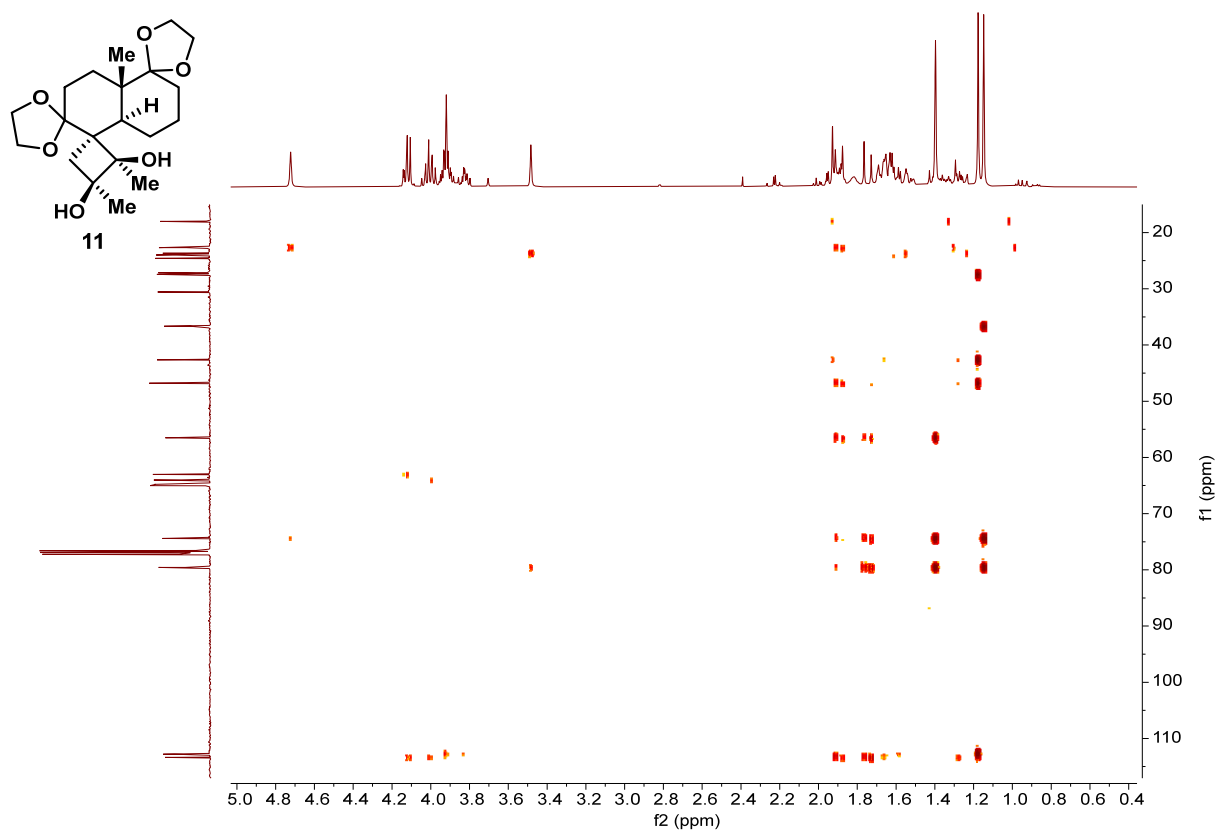

Figure S98. HMBC Spectra of Compound **11** (CDCl<sub>3</sub>, 400 MHz)

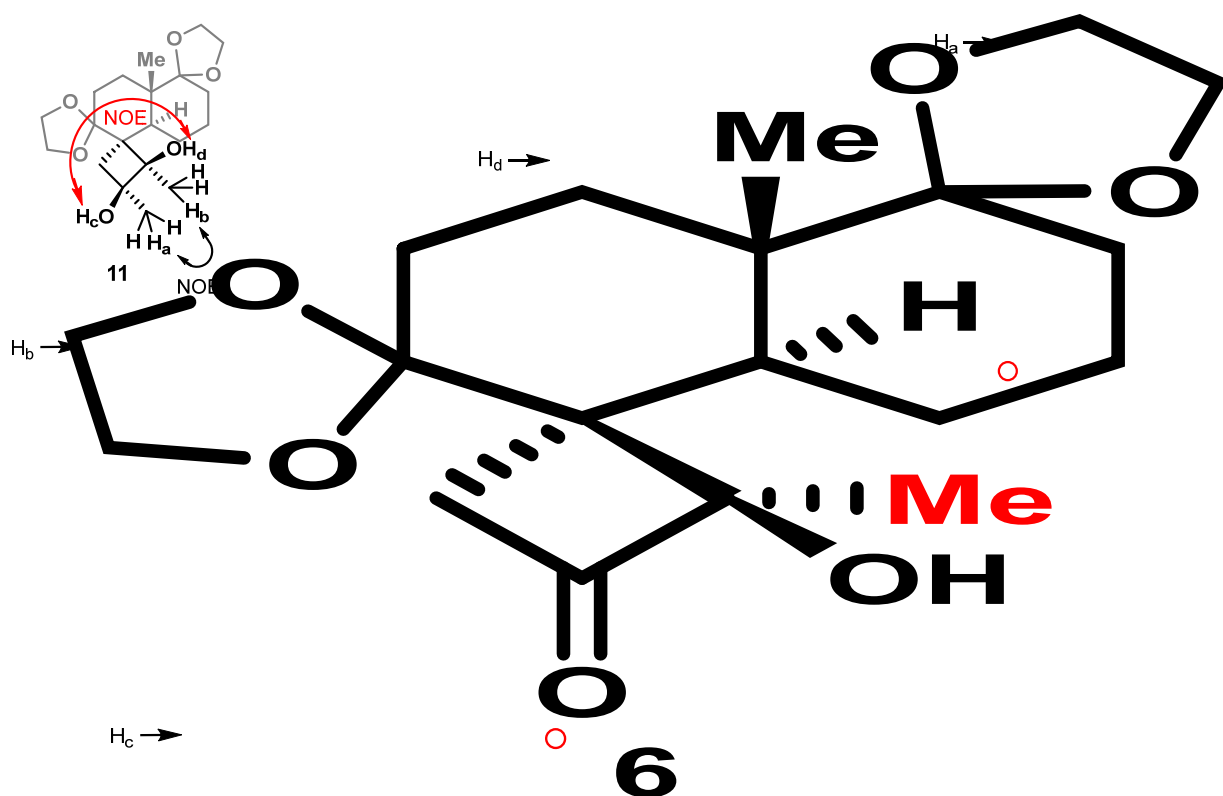

Figure S99. NOESY Spectra of Compound 11 (CDCl<sub>3</sub>, 400 MHz)

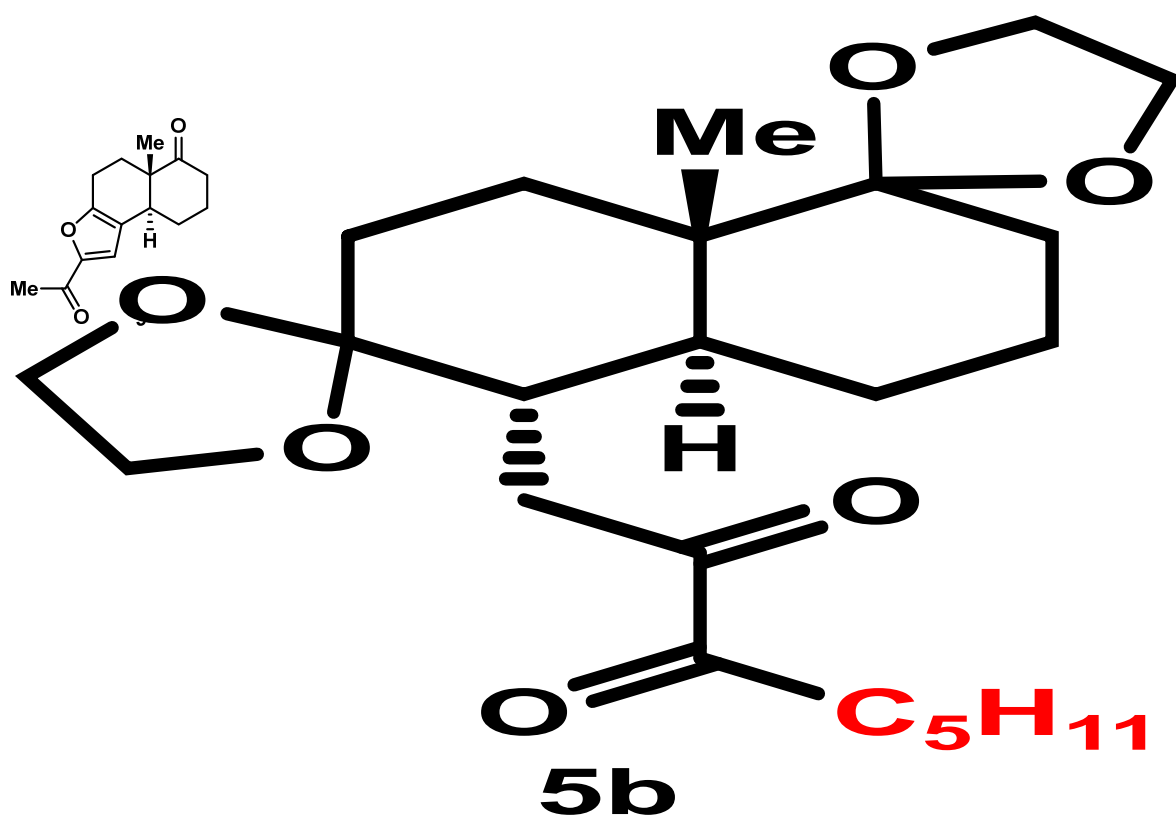

Figure S100. <sup>1</sup>H NMR Spectra of Compound 9 (CDCl<sub>3</sub>, 500 MHz)

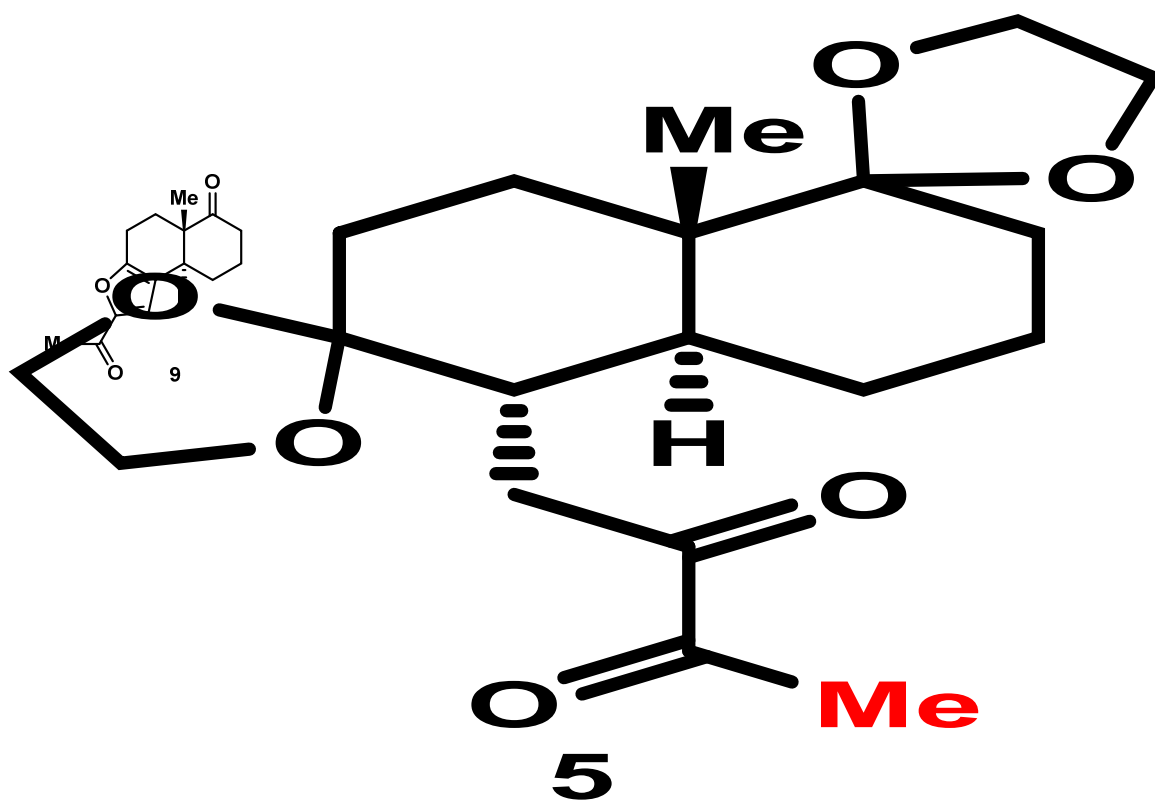

Figure S101. <sup>13</sup>C NMR Spectra of Compound 9 (CDCl<sub>3</sub>, 125 MHz)

## Part V: X-ray Crystal Images

### X-ray Crystallography Data of **6**

CCDC 2002822 contains the supplementary crystallographic data for **6**. The XRD sample of **6** was prepared by slow evaporation from a CH<sub>2</sub>Cl<sub>2</sub>/hexane (1:3) solution at room temperature. The absolute and relative configurations of **6** was unambiguously assigned from the XRD analysis. The crystal parameters are depicted in **Table S4**.

**Table S4.** Crystal data and structure refinement for **6**.

|                                             |                                                               |
|---------------------------------------------|---------------------------------------------------------------|
| Identification code                         | <b>6</b>                                                      |
| Empirical formula                           | C <sub>19</sub> H <sub>28</sub> O <sub>6</sub>                |
| Formula weight                              | 352.41                                                        |
| Temperature/K                               | 100.00(10)                                                    |
| Crystal system                              | monoclinic                                                    |
| Space group                                 | P2 <sub>1</sub>                                               |
| a/Å                                         | 8.17106 (13)                                                  |
| b/Å                                         | 34.8703 (6)                                                   |
| c/Å                                         | 9.23924 (15)                                                  |
| α/°                                         | 90                                                            |
| β/°                                         | 91.1734(15)                                                   |
| γ/°                                         | 90                                                            |
| Volume/Å <sup>3</sup>                       | 2631.96(8)                                                    |
| Z                                           | 6                                                             |
| ρ <sub>calc</sub> /cm <sup>3</sup>          | 1.334                                                         |
| μ/mm <sup>-1</sup>                          | 0.809                                                         |
| F(000)                                      | 1140.0                                                        |
| Crystal size/mm <sup>3</sup>                | 0.14 × 0.12 × 0.11                                            |
| Radiation                                   | CuKα (λ = 1.54184)                                            |
| 2θ range for data collection/°              | 5.068 to 147.102                                              |
| Index ranges                                | -10 ≤ h ≤ 9, -42 ≤ k ≤ 36, -11 ≤ l ≤ 8                        |
| Reflections collected                       | 10571                                                         |
| Independent reflections                     | 7622 [R <sub>int</sub> = 0.0191, R <sub>sigma</sub> = 0.0307] |
| Data/restraints/parameters                  | 7622/1/691                                                    |
| Goodness-of-fit on F <sup>2</sup>           | 1.043                                                         |
| Final R indexes [I >= 2σ (I)]               | R <sub>1</sub> = 0.0346, wR <sub>2</sub> = 0.0905             |
| Final R indexes [all data]                  | R <sub>1</sub> = 0.0350, wR <sub>2</sub> = 0.0908             |
| Largest diff. peak/hole / e Å <sup>-3</sup> | 0.26/-0.43                                                    |
| Flack/Hoof parameter                        | 0.01(6)                                                       |

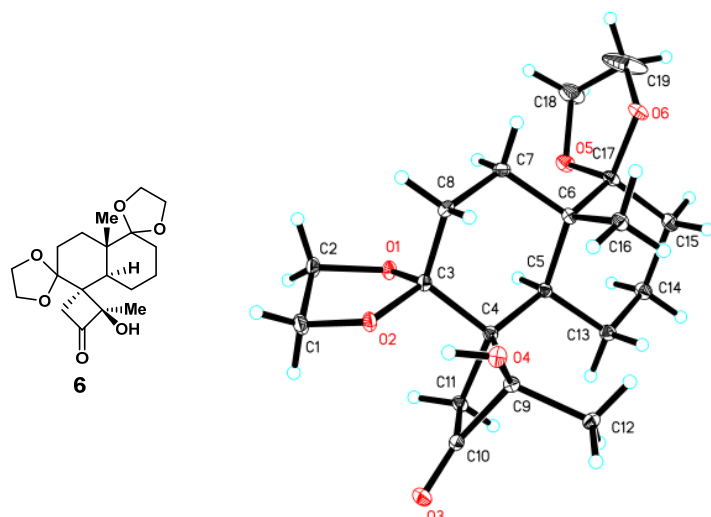

**Figure S102.** X-ray crystallographic structure of **6**.

#### X-ray Crystallography Data of **6c**

CCDC 2002823 contains the supplementary crystallographic data for **6c**. The XRD sample of **6c** was prepared by slow evaporation from a CH<sub>2</sub>Cl<sub>2</sub>/hexane (1:3) solution at room temperature. The absolute and relative configurations of **6c** was unambiguously assigned from the XRD analysis. The crystal parameters are depicted in **Table S5**.

**Table S5.** Crystal data and structure refinement for **6c**.

|                                    |                                                |
|------------------------------------|------------------------------------------------|
| <b>Identification code</b>         | <b>6c</b>                                      |
| Empirical formula                  | C <sub>24</sub> H <sub>36</sub> O <sub>6</sub> |
| Formula weight                     | 420.53                                         |
| Temperature/K                      | 100.00(10)                                     |
| Crystal system                     | orthorhombic                                   |
| Space group                        | P2 <sub>1</sub> 2 <sub>1</sub> 2 <sub>1</sub>  |
| a/Å                                | 8.08181(13)                                    |
| b/Å                                | 10.73068(14)                                   |
| c/Å                                | 24.3476(4)                                     |
| α/°                                | 90                                             |
| β/°                                | 90                                             |
| γ/°                                | 90                                             |
| Volume/Å <sup>3</sup>              | 2111.51(5)                                     |
| Z                                  | 4                                              |
| ρ <sub>calc</sub> /cm <sup>3</sup> | 1.323                                          |
| μ/mm <sup>-1</sup>                 | 0.759                                          |
| F(000)                             | 912.0                                          |
| Crystal size/mm <sup>3</sup>       | 0.13 × 0.11 × 0.08                             |
| Radiation                          | CuKα (λ = 1.54184)                             |
| 2θ range for data collection/°     | 7.262 to 146.832                               |

|                                             |                                                               |
|---------------------------------------------|---------------------------------------------------------------|
| Index ranges                                | -10 ≤ h ≤ 6, -12 ≤ k ≤ 13, -29 ≤ l ≤ 29                       |
| Reflections collected                       | 9823                                                          |
| Independent reflections                     | 4020 [R <sub>int</sub> = 0.0209, R <sub>sigma</sub> = 0.0210] |
| Data/restraints/parameters                  | 4020/0/277                                                    |
| Goodness-of-fit on F <sup>2</sup>           | 1.055                                                         |
| Final R indexes [I ≥ 2σ(I)]                 | R <sub>1</sub> = 0.0281, wR <sub>2</sub> = 0.0731             |
| Final R indexes [all data]                  | R <sub>1</sub> = 0.0283, wR <sub>2</sub> = 0.0734             |
| Largest diff. peak/hole / e Å <sup>-3</sup> | 0.23/-0.14                                                    |
| Flack/Hoof parameter                        | -0.04(5)/-0.04(5)                                             |

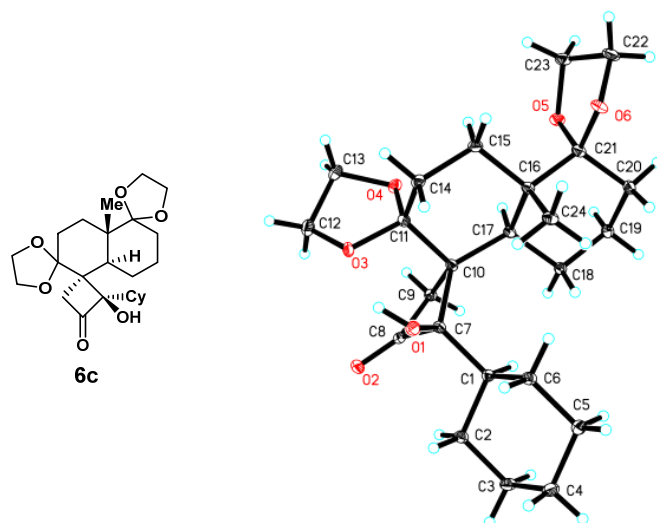

**Figure S103.** X-ray crystallographic structure of **6c**.

#### X-ray Crystallography Data of **7b**

CCDC 2002824 contains the supplementary crystallographic data for **7b**. The XRD sample of **7b** was prepared by slow evaporation from a CH<sub>2</sub>Cl<sub>2</sub>/hexane (1:3) solution at room temperature. The absolute and relative configurations of **7b** was unambiguously assigned from the XRD analysis. The crystal parameters are depicted in **Table S6**.

**Table S6.** Crystal data and structure refinement for **7b**.

|                            |                                                |
|----------------------------|------------------------------------------------|
| <b>Identification code</b> | <b>7b</b>                                      |
| Empirical formula          | C <sub>18</sub> H <sub>28</sub> O <sub>5</sub> |
| Formula weight             | 324.40                                         |
| Temperature/K              | 100.00(10)                                     |
| Crystal system             | orthorhombic                                   |
| Space group                | P2 <sub>1</sub> 2 <sub>1</sub> 2 <sub>1</sub>  |
| a/Å                        | 9.5133(10)                                     |
| b/Å                        | 10.7778(10)                                    |
| c/Å                        | 16.2346(19)                                    |



|                                               |                                                               |
|-----------------------------------------------|---------------------------------------------------------------|
| $\alpha/^\circ$                               | 90                                                            |
| $\beta/^\circ$                                | 90                                                            |
| $\gamma/^\circ$                               | 90                                                            |
| Volume/ $\text{\AA}^3$                        | 1664.6(3)                                                     |
| Z                                             | 4                                                             |
| $\rho_{\text{calc}}/\text{cm}^3$              | 1.294                                                         |
| $\mu/\text{mm}^{-1}$                          | 0.759                                                         |
| F(000)                                        | 704.0                                                         |
| Crystal size/ $\text{mm}^3$                   | $0.12 \times 0.11 \times 0.1$                                 |
| Radiation                                     | CuK $\alpha$ ( $\lambda = 1.54184$ )                          |
| $2\theta$ range for data collection/ $^\circ$ | 9.85 to 149.132                                               |
| Index ranges                                  | $-11 \leq h \leq 11, -13 \leq k \leq 13, -16 \leq l \leq 19$  |
| Reflections collected                         | 9482                                                          |
| Independent reflections                       | 3321 [ $R_{\text{int}} = 0.0423, R_{\text{sigma}} = 0.0357$ ] |
| Data/restraints/parameters                    | 3321/14/212                                                   |
| Goodness-of-fit on $F^2$                      | 1.065                                                         |
| Final R indexes [ $I \geq 2\sigma(I)$ ]       | $R_1 = 0.0847, wR_2 = 0.2104$                                 |
| Final R indexes [all data]                    | $R_1 = 0.1023, wR_2 = 0.2374$                                 |
| Largest diff. peak/hole / $e \text{\AA}^{-3}$ | 0.56/-0.59                                                    |
| Flack/Hoofit parameter                        | -0.05(16)/0.01(10)                                            |

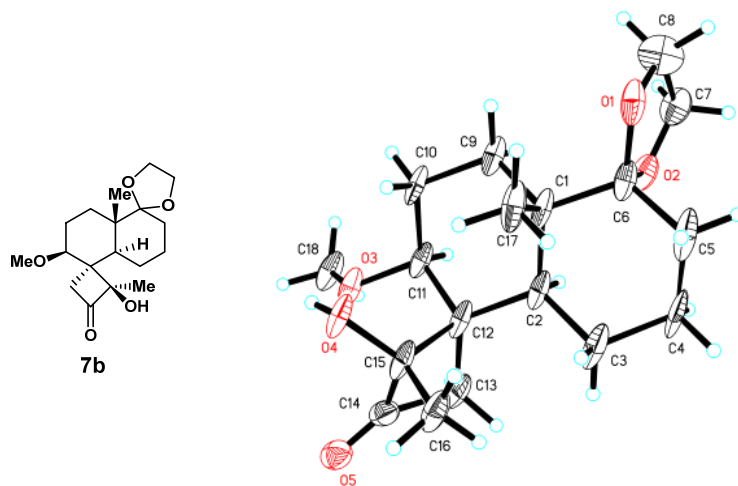

**Figure S104.** X-ray crystallographic structure of **7b**.
